# Supplementary material for: Flupirtine Analogues: Explorative Synthesis and Influence of Chemical Structure on KV7.2/KV7.3 Channel Opening Activity
Source: PubMed Central journal article supplement — ChemistryOpen. 2019 Jan 15;8(1):41–4. doi: 10.1002/open.201800244 (PMC6331712; doi:10.1002/open.201800244), 2019-01-15
Supplement: OPEN-8-41-s001.pdf [file OPEN-8-41-s001.pdf]

## Supporting Information

© Copyright Wiley-VCH Verlag GmbH & Co. KGaA, 69451 Weinheim, 2019

### **Flupirtine Analogues: Explorative Synthesis and Influence of Chemical Structure on $K_v7.2/K_v7.3$ Channel Opening Activity**

Abdrrahman S. Surur, Kristin Beirow, Christian Bock, Lukas Schulig, Markus K. Kindermann, Anja Bodtke, Werner Siegmund, Patrick J. Bednarski, and Andreas Link\*©2019 The Authors. Published by Wiley-VCH Verlag GmbH & Co. KGaA.

This is an open access article under the terms of the Creative Commons Attribution Non-Commercial NoDerivs License, which permits use and distribution in any medium, provided the original work is properly cited, the use is non-commercial and no modifications or adaptations are made.

## Contents

|                                                                                                            |    |
|------------------------------------------------------------------------------------------------------------|----|
| Specific procedures and characterization.....                                                              | 2  |
| 2-Amino-6-chloro-3-nitropyridine ( <b>6a</b> ) .....                                                       | 14 |
| 6-Chloro- <i>N</i> -methyl-3-nitropyridin-2-amine ( <b>6b</b> ) .....                                      | 15 |
| 6-Amino-5-nitropyridine-2-thiol ( <b>7a</b> ) .....                                                        | 16 |
| 6-(Methylamino)-5-nitropyridine-2-thiol ( <b>7b</b> ) .....                                                | 17 |
| 6-Methyl-5-nitropyridine-2-thiol ( <b>7c</b> ) .....                                                       | 18 |
| 6-[(4-Fluorobenzyl)thio]-3-nitropyridin-2-amine ( <b>8a</b> ) .....                                        | 19 |
| 6-[(1,1'-Biphenyl-4-yl)methylthio]-3-nitropyridin-2-amine ( <b>8b</b> ).....                               | 20 |
| 6-[(3,5-Dimethoxybenzyl)thio]-3-nitropyridin-2-amine ( <b>8c</b> ) .....                                   | 21 |
| 3-Nitro-6-[(pyridin-2-ylmethyl)thio]pyridin-2-amine ( <b>8d</b> ) .....                                    | 22 |
| <i>S</i> -(6-Amino-5-nitropyridin-2-yl) 4-fluorobenzothioate ( <b>8e</b> ).....                            | 23 |
| 3-Nitro-6-{[2-(piperidin-1-yl)ethyl]thio}pyridin-2-amine ( <b>8f</b> ) .....                               | 24 |
| 6-(Benzylthio)- <i>N</i> -methyl-3-nitropyridin-2-amine ( <b>8g</b> ) .....                                | 25 |
| 6[(4-Fluorobenzyl)thio]-2-methyl-3-nitropyridine ( <b>8h</b> ) .....                                       | 26 |
| <i>N</i> -[2-Amino-6-[(4-fluorobenzyl)thio]pyridin-3-yl]-3,4-difluorobenzamide ( <b>9a</b> ) .....         | 27 |
| Ethyl-{6-[(1,1'-biphenyl-4-yl)methylthio]-2-aminopyridin-3-yl}carbamate ( <b>9b</b> ) .....                | 28 |
| Ethyl-{2-amino-6-[(3,5-dimethoxybenzylthio)pyridin-3-yl]}carbamate ( <b>9c</b> ).....                      | 29 |
| Ethyl-{2-amino-6-[(pyridin-2-ylmethylthio)pyridin-3-yl]}carbamate ( <b>9d</b> ) .....                      | 30 |
| <i>S</i> -(6-Amino-5-[(ethoxycarbonyl)amino]pyridin-2-yl) 4-fluorobenzothioate ( <b>9e</b> ) .....         | 31 |
| Ethyl {2-amino-6-[(2-(piperidin-1-yl)ethylthio)pyridin-3-yl]}carbamate ( <b>9f</b> ) .....                 | 32 |
| <i>N</i> -[6-(Benzylthio)-2-(methylamino)pyridin-3-yl]-2-(3,5-difluorophenyl)acetamide ( <b>9g</b> ) ..... | 33 |
| Ethyl [6-(4-fluorobenzylthio)-2-methylpyridin-3-yl]carbamate ( <b>9h</b> ) .....                           | 34 |
| <i>N</i> -[2-Amino-6-(4-fluorobenzylsulfinyl)pyridin-3-yl]-3,4-difluorobenzamide ( <b>10a</b> ) .....      | 35 |
| Ethyl {6-[(1,1'-biphenyl-4-yl)methylsulfinyl]-2-aminopyridin-3-yl}carbamate ( <b>10b</b> ).....            | 36 |
| Calibration curve and retention times for LogD <sub>7.4</sub> determination.....                           | 39 |
| Retention time, retention factor and literature LogP values of references .....                            | 39 |
| Calibration curve.....                                                                                     | 39 |
| Retention time, retention factor and LogD <sub>7.4</sub> of synthesized compounds.....                     | 40 |
| Biological Evaluations .....                                                                               | 40 |
| MTT cell viability assay.....                                                                              | 40 |
| K <sub>v</sub> 7.2/3 channel opening assay .....                                                           | 41 |
| Toxicity/Activity ratio.....                                                                               | 41 |

## Specific procedures and characterization

### 2-Amino-6-chloro-3-nitropyridine (**6a**)

2,6-Dichloro-3-nitropyridine (40 mmol, 7.72g) was dissolved in 2-propanol (300 mL). An excess of aqueous ammonia (20 mL, 25%) was added. The reaction mixture was then warmed to 35 °C and stirred for 5 days. A light yellow precipitate was collected by filtration, which was washed with water (2 x 50 mL) and dried using desiccator. Light yellow solid (yield= 77%); mp: 194-195 °C; <sup>1</sup>H NMR (400 MHz, DMSO-d<sub>6</sub>): δ= 8.40 (d, *J*= 8.6 Hz, 1H), 8.26 (br s, 2H), 6.78 (d, *J*= 8.6 Hz, 1H); <sup>13</sup>C NMR (100 MHz, DMSO-d<sub>6</sub>): δ= 155.0, 153.5, 138.4, 126.1, 112.0; IR:  $\tilde{\nu}$  = 3442, 3277, 1633, 1556, 1495, 1422, 1338, 1234, 1148, 946, 762, 502 cm<sup>-1</sup>.

### 6-Chloro-*N*-methyl-3-nitropyridin-2-amine (**6b**)

2,6-Dichloro-3-nitropyridine (5 mmol, 1.0 g) was dissolved in acetonitrile (20 mL). After adding triethylamine (7.5 mmol, 1 mL), the mixture was cooled to about 0 °C. Methylamine (6 mmol, 613 μL) was dissolved in acetonitrile (10 mL) and added slowly over a period of 30 min. After complete addition of methylamine, the mixture was stirred for 10 min at about 0 °C and then allowed to rise to room temperature. The mixture was stirred at room temperature for 30 min. The product was purified using silica gel chromatography (solvent: toluene). Yellow solid (yield= 68%); mp: 119-120 °C; <sup>1</sup>H NMR (400 MHz, DMSO-d<sub>6</sub>): δ= 8.72 (d, *J*= 3.1 Hz, 1H), 8.43 (d, *J*= 8.6 Hz, 1H), 6.78 (d, *J*= 8.6 Hz, 1H), 3.01 (d, *J*= 4.8 Hz, 3H); <sup>13</sup>C NMR (100 MHz, DMSO-d<sub>6</sub>): δ= 155.2, 152.1, 138.4, 126.9, 111.0, 28.5; IR:  $\tilde{\nu}$  = 3397, 3111, 1567, 1504, 1375, 1217, 758 cm<sup>-1</sup>.

### 6-Amino-5-nitropyridine-2-thiol (**7a**)

Compound **6a** (4.2 mmol, 730 mg), sulfur (3.1 mmol, 103 mg), Na<sub>2</sub>S·9H<sub>2</sub>O (3 mmol, 702mg) and sodium hydroxide (4.2 mmol, 168 mg) were added to a round bottom flask. After adding ethanol (30 mL), the mixture was held under reflux for 5 hours. The reaction mixture was poured into ice-cooled water (100 mL) and then washed with dichloromethane (3 x 50 mL). The mixture was acidified (pH=4) with stepwise addition of 10% HCl, which resulted in precipitation of the product. Eventually, an orange coloured product was collected by filtration and dried using desiccator. Orange coloured solid (yield= 80%); mp: 190-191 °C; <sup>1</sup>H NMR (400 MHz, DMSO-d<sub>6</sub>): δ= 12.64 (s,

1H), 8.69 (br d,  $J=7.0$  Hz, 1H), 7.93 (d,  $J=9.4$  Hz, 1H), 7.61 (br d,  $J=10.4$  Hz, 1H), 6.51 (d,  $J=9.5$  Hz, 1H);  $^{13}\text{C}$  NMR (100 MHz, DMSO- $d_6$ ):  $\delta=183.8, 149.5, 131.9, 119.5, 118.8$ ; IR:  $\tilde{\nu}=3386, 3243, 1631, 1593, 1258, 1090, 755\text{ cm}^{-1}$ .

#### 6-(Methylamino)-5-nitropyridine-2-thiol (**7b**)

Compound **6b** (7.34 mmol, 1.38 mg), sulfur (5.35 mmol, 171 mg),  $\text{Na}_2\text{S}\cdot 9\text{H}_2\text{O}$  (5.29 mmol, 1.25 g) and sodium hydroxide (7.34 mmol, 294 mg) were added to a round bottom flask. After adding ethanol (30 mL), the mixture was heated under reflux for 6 hours. The reaction mixture was poured into ice-cooled water (100 mL) and then washed with dichloromethane (3 x 50 mL). The mixture was acidified to pH=4 with stepwise addition of 10% HCl. Eventually, the product was collected by filtration and dried using desiccator. Orange coloured solid (yield= 48%); mp: 193-194 °C;  $^1\text{H}$  NMR (400 MHz, DMSO- $d_6$ ):  $\delta=11.92$  (br s, 1H), 9.62 (d,  $J=4.7$  Hz, 1H), 7.94 (d,  $J=9.5$  Hz, 1H), 6.52 (d,  $J=9.5$  Hz, 1H), 3.17 (d,  $J=5.4$  Hz, 3H);  $^{13}\text{C}$  NMR (100 MHz, DMSO- $d_6$ ):  $\delta=185.0, 149.4, 131.4, 119.3, 119.1, 29.5$ ; IR:  $\tilde{\nu}=3246, 1623, 1581, 1338, 1140, 748, 529\text{ cm}^{-1}$ .

#### 6-Methyl-5-nitropyridine-2-thiol (**7c**)

Compound **6c** (10 mmol, 2.17 g), sulfur (7.29 mmol, 234 mg),  $\text{Na}_2\text{S}\cdot 9\text{H}_2\text{O}$  (7.2 mmol, 1.73 g) and sodium hydroxide (10 mmol, 400 mg) were added to a round bottom flask. After adding ethanol (40 mL), the mixture was heated under reflux for 3 hours. The reaction mixture was poured into ice-cooled water (100 mL) and then washed with dichloromethane (3 x 50 mL). The pH of the solution was adjusted to 4 with stepwise addition of 10% HCl. Eventually, the product was collected by filtration. Brown solid (yield= 32%); mp: 175-176 °C;  $^1\text{H}$  NMR (400 MHz, DMSO- $d_6$ ):  $\delta=13.95$  (br s, 1H), 7.99 (d,  $J=9.5$  Hz, 1H), 7.20 (d,  $J=9.6$  Hz, 1H), 2.73 (s, 3H);  $^{13}\text{C}$  NMR (100 MHz, DMSO- $d_6$ ):  $\delta=183.2, 150.6, 135.5, 130.9, 130.6, 19.0$ ; IR:  $\tilde{\nu}=3196, 1585, 1327, 1210, 1069, 830, 510\text{ cm}^{-1}$ .

#### 6-[(4-Fluorobenzyl)thio]-3-nitropyridin-2-amine (**8a**)

Compound **7a** (6 mmol, 1.03 g) was dissolved in dimethylformamide (10 mL). This was followed by the addition of 10% KOH (6 mmol, 3.1 mL) and 4-fluorobenzyl bromide (6 mmol, 740  $\mu\text{L}$ ). The reaction was completed after 1 hour of stirring at room temperature. The product was

precipitated with addition of water. A yellow product was collected by filtration and then washed with n-hexane and ethanol. Yellow solid (yield = 85%); mp: 139-140 °C; <sup>1</sup>H NMR (400 MHz, DMSO-d<sub>6</sub>): δ= 8.16 (d, *J*= 8.8 Hz, 3H), 7.55 (m, 2H), 7.15 (m, 2H), 6.62 (d, *J*= 8.8 Hz, 1H), 4.45 (s, 2H); <sup>13</sup>C NMR (100 MHz, DMSO-d<sub>6</sub>): δ= 166.3, 162.5 (d, *J*= 243 Hz, 1C), 153.1, 134.5, 134.2 (d, *J*= 3 Hz, 1C), 131.2 (d, *J*= 8 Hz, 1C), 123.5, 115.2 (d, *J*= 21 Hz, 1C), 110.3, 32.2; IR:  $\tilde{\nu}$  = 3458, 3333, 1558, 1345, 1220, 1144, 763 cm<sup>-1</sup>.

#### 6-[(1,1'-Biphenyl-4-yl)methylthio]-3-nitropyridin-2-amine (**8b**)

Compound **7a** (2.5 mmol, 430 mg) was dissolved in dimethylformamide (10 mL), to which 10% KOH (2.5 mmol, 1.4 mL) and 4-(bromomethyl)biphenyl (2.5 mmol, 668 mg) were added respectively. The reaction was completed after 1 hour of stirring at room temperature. Water was added to precipitate the product. The product was filtered and washed with n-hexane and ethanol. Yellow solid (yield= 90%); mp: 179-181 °C; <sup>1</sup>H NMR (400 MHz, DMSO-d<sub>6</sub>): δ= 8.18 (d, *J*= 8.8 Hz, 3H), 7.66 (m, 6H), 7.45 (m, 2H), 7.37 (m, 1H), 6.65 (d, *J*= 8.8 Hz, 1H) 4.45 (s, 2H); <sup>13</sup>C NMR (100 MHz, DMSO-d<sub>6</sub>): δ= 166.4, 153.1, 139.7, 139.0, 136.9, 134.4, 129.6 (2C), 128.8 (2C), 127.3, 126.6 (2C), 126.5 (2C), 123.4, 110.2, 32.7; IR:  $\tilde{\nu}$  = 3463, 3324, 1595, 1335, 1166, 1144, 763, 740 cm<sup>-1</sup>.

#### 6-[(3,5-Dimethoxybenzyl)thio]-3-nitropyridin-2-amine (**8c**)

Compound **7a** (2 mmol, 344 mg) was dissolved in dimethylformamide (10 mL). 10% KOH (2 mmol, 1.1 mL) and dimethoxybenzyl bromide (2 mmol, 463 mg) were added respectively to the reaction solution, which was stirred for 1 hour at room temperature. Water was added in order to precipitate the product. The product was washed with ethanol and n-hexane. Yellow solid (yield = 76%); mp: 124-125 °C; <sup>1</sup>H NMR (400 MHz, DMSO-d<sub>6</sub>): δ= 8.17 (d, *J*= 8.8 Hz, 1H), 6.65 (d, *J*= 2.2 Hz, 2H), 6.62 (d, *J*= 8.8 Hz, 1H), 6.38 (t, 1H), 4.39 (s, 2H), 3.71 (s, 6H); <sup>13</sup>C NMR (100 MHz, DMSO-d<sub>6</sub>): δ= 166.5, 160.4 (2C), 153.1, 139.9, 134.4, 123.4, 110.2, 107.1 (2C), 99.0, 55.1 (2C), 33.2; IR:  $\tilde{\nu}$  = 3488, 3362, 2834, 1577, 1462, 1204, 1145, 1052 cm<sup>-1</sup>.

### 3-Nitro-6-[(pyridin-2-ylmethyl)thio]pyridin-2-amine (**8d**)

Compound **7a** (2 mmol, 344 mg) was dissolved in dimethylformamide (10 mL). 10% KOH (3 mmol, 1.8 mL) and 2-(bromomethyl)pyridine HBr (2 mmol, 502 mg) were added respectively to the reaction solution. The reaction was completed after 1 hour of stirring at room temperature. The product was precipitated with the addition of water. Eventually, the product was filtered and washed with *n*-hexane. Saffron coloured solid (yield = 88%); mp: 121-123 °C; <sup>1</sup>H NMR (400 MHz, DMSO-*d*<sub>6</sub>): δ = 8.78 (d, *J* = 5.0 Hz, 1H), 8.34 (t, 1H), 8.19 (d, *J* = 8.8 Hz, 1H), 8.11 (d, *J* = 8.0 Hz, 1H), 7.78 (t, 1H), 6.70 (d, *J* = 8.8 Hz, 1H), 4.70 (s, 2H); <sup>13</sup>C NMR (100 MHz, DMSO-*d*<sub>6</sub>): δ = 166.5, 157.0, 153.1, 149.2, 136.8, 134.5, 123.5, 122.4, 110.2, 35.3; IR:  $\tilde{\nu}$  = 3404, 3242, 2595, 1606, 1569, 1243, 1143, 749 cm<sup>-1</sup>.

### S-(6-Amino-5-nitropyridin-2-yl) 4-fluorobenzothioate (**8e**)

Compound **7a** (2 mmol, 344 mg) was dissolved in 2-propanol (15 mL). Triethylamine (4 mmol, 560 μL) and 4-benzoyl chloride (2 mmol, 120 μL) were added to the reaction solution. The mixture was held at reflux for overnight. Water was added to precipitate the product. The precipitate was filtered and washed with water and *n*-hexane. Eventually, the product was recrystallized from ethyl acetate. Yellow solid (yield = 82%); mp: 168-169 °C; <sup>1</sup>H NMR (400 MHz, DMSO-*d*<sub>6</sub>): δ = 8.49 (d, *J* = 8.6 Hz, 1H), 8.12 (s, 2H), 8.10 (m, 2H), 7.48 (m, 2H), 7.18 (d, *J* = 8.6 Hz, 1H); <sup>13</sup>C NMR (100 MHz, DMSO-*d*<sub>6</sub>): δ = 186.3, 167.1 (d, *J* = 254 Hz, 1C), 157.8, 153.3, 152.9, 136.1, 133.5, 132.4 (d, *J* = 3 Hz, 1C), 130.4 (d, *J* = 10 Hz, 2C), 126.6, 117.0 (t, *J* = 24 Hz, 2C), 107.2; IR:  $\tilde{\nu}$  = 3489, 3067, 1674, 1549, 1477, 1236, 765 cm<sup>-1</sup>.

### 3-Nitro-6-[[2-(piperidin-1-yl)ethyl]thio]pyridin-2-amine (**8f**)

Aqueous KOH 10% (3 mmol, 1.8 mL) was added to the round bottom flask that contains compound **7a** (2 mmol, 344 mg) and 1-(2-chloroethyl)piperidine HCl. Dimethylformamide (10 mL) was added to put the above compounds into a solution. The solution was stirred for 1 hour at room temperature. The product was precipitated by the addition of water. The precipitate was then washed with *n*-hexane and aqueous NaOH 10%. Saffron coloured solid (yield = 87%); mp: 108-109 °C; <sup>1</sup>H NMR (400 MHz, DMSO-*d*<sub>6</sub>): δ = 8.15 (d, *J* = 8.8 Hz, 1H), 8.04 (s, 2H), 6.62 (d, *J* = 8.8 Hz, 1H), 3.32 (t, 2H), 2.56 (t, 2H), 2.40 (m, 4H), 1.51 (m, 4H), 1.40 (m, 2H); <sup>13</sup>C NMR (100 MHz,

DMSO- $d_6$ ):  $\delta$ = 167.7, 153.2, 134.1, 123.2, 110.6, 57.41, 53.8 (2C), 27.1, 25.5 (2C), 24.0; IR:  $\tilde{\nu}$  = 3457, 3328, 2933, 2760, 1607, 1557, 1347, 1229, 1141, 766  $\text{cm}^{-1}$ .

#### 6-(Benzylthio)-*N*-methyl-3-nitropyridin-2-amine (**8g**)

Compound **7b** (3.25 mmol, 602 mg) was dissolved in dimethylformamide (10 mL). 10% KOH (3.25 mmol, 2 mL) and benzyl bromide (3.25 mmol, 387  $\mu\text{L}$ ) were added sequentially to the above mixture. The mixture was stirred for 1 hour and a yellow product was precipitated with the addition of water. The precipitate was washed with ethanol and *n*-hexane. Yellow solid (yield= 89%); mp: 133-134  $^{\circ}\text{C}$ ;  $^1\text{H}$  NMR (400 MHz, DMSO- $d_6$ ):  $\delta$ = 8.76 (d,  $J$ = 4.4 Hz, 1H), 8.20 (d,  $J$ = 8.8 Hz, 1H), 7.44 (m, 2H), 7.35 (m, 2H), 7.23 (m, 1H), 6.65 (d,  $J$ = 8.8 Hz, 1H), 4.53 (s, 1H), 3.09 (d,  $J$ = 4.8 Hz, 3H);  $^{13}\text{C}$  NMR (100 MHz, DMSO- $d_6$ ):  $\delta$ = 166.8, 151.8, 137.4, 134.6, 128.7 (2C), 128.5 (2C), 127.2, 124.1, 109.3, 33.4, 28.3; IR:  $\tilde{\nu}$  = 3374, 1577, 1374, 1212, 1036, 928, 760  $\text{cm}^{-1}$ .

#### 6[(4-Fluorobenzyl)thio]-2-methyl-3-nitropyridine (**8h**)

Compound **7c** (3 mmol, 510 mg) was dissolved in dimethylformamide (10 mL). This was followed by the addition of aqueous KOH 10% (3 mmol, 1.68 mL) and 4-fluorobenzyl bromide (3 mmol, 374  $\mu\text{L}$ ) respectively. After 1 hour of stirring at room temperature, the reaction was complete. The product was precipitated with the addition of water. Eventually, the product was filtered and further purified by washing with *n*-hexane. Pale yellow solid (yield= 66%); mp: 66-67  $^{\circ}\text{C}$ ;  $^1\text{H}$  NMR (400 MHz, DMSO- $d_6$ ):  $\delta$ = 8.23 (d,  $J$ = 8.7 Hz, 1H), 7.51 (m, 2H), 7.42 (d,  $J$ = 8.8 Hz, 1H), 7.12 (m, 2H), 4.50 (s, 2H), 2.78 (s, 3H);  $^{13}\text{C}$  NMR (100 MHz, DMSO- $d_6$ ):  $\delta$ = 163.4, 162.5 (d,  $J$ = 243 Hz, 1C), 153.4, 142.1, 133.7 (d,  $J$ = 3 Hz, 1C), 133.1, 131.0 (d,  $J$ = 8 Hz, 2C), 119.6, 115.3 (d,  $J$ = 22 Hz, 2C), 32.8, 23.9; IR:  $\tilde{\nu}$  = 3074, 1566, 1499, 1324, 1066, 753, 530  $\text{cm}^{-1}$ .

#### *N*-{2-Amino-6-[(4-fluorobenzyl)thio]pyridin-3-yl}-3,4-difluorobenzamide (**9a**)

Compound **8a** (5 mmol, 1.4 g), iron powder (50 mmol, 2.8 g) and ammonium chloride (50 mmol, 2.675 g) were suspended in 4:1 ethanol/water (15 mL). The suspension was stirred at 100  $^{\circ}\text{C}$  for 1 hour. The suspension was filtered through a glass filter protected with 1 cm layer of diatomaceous earth and washed with ethyl acetate (2 x 50 mL). The filtrate was poured into water (50 mL) and extracted with ethyl acetate (2 x 50 mL). Triethylamine (7.5 mmol, 1.05 mL)

was added to the combined filtrate. The solution was cooled to about 0 °C and 3,4-difluorobenzyl chloride (5 mmol, 630 µL) was added slowly over a period of 30 min. After complete addition of 3,4-difluorobenzyl bromide, the mixture was stirred for 1 hour at room temperature. Eventually, the mixture was concentrated and left in the refrigerator to allow precipitation of the product. The product was further purified by recrystallization from dichloromethane. White solid (yield= 35%); purity 99%; mp: 150-151 °C; <sup>1</sup>H NMR (400 MHz, DMSO-d<sub>6</sub>): δ= 9.64 (s, 1H), 8.08 (m, 1H), 7.86 (d, *J*= 2.0 Hz, 1H), 7.63 (m, 1H), 7.56 (m, 2H), 7.34 (d, 1H), 7.13 (m, 2H), 6.49 (d, *J*= 7.9 Hz, 1H), 6.09 (s, 2H), 4.34 (s, 2H); <sup>13</sup>C NMR (100 MHz, DMSO-d<sub>6</sub>): δ= 167.3, 162.3 (d, *J*= 241 Hz, 1C), 154.6, 152.5, 150.3, 147.8, 135.2, 135.0 (d, *J*= 3 Hz, 1C), 130.8 (d, *J*= 8 Hz, 2C), 125.4, 117.5 (d, *J*= 9 Hz, 1C), 117.3 (d, *J*= 9 Hz, 1C), 115.1 (d, *J*= 21 Hz, 2C), 114.1, 109.0, 32.5; IR:  $\tilde{\nu}$  = 3396, 3298, 3150, 1629, 1504, 1462, 1226, 750 cm<sup>-1</sup>; HRMS-ESI *m/z* [M-H]<sup>-</sup> calcd for C<sub>19</sub>H<sub>14</sub>N<sub>3</sub>OF<sub>3</sub>S: 388.0737, found: 388.0747.

#### Ethyl-{6-[(1,1'-biphenyl-4-yl)methylthio]-2-aminopyridin-3-yl}carbamate (**9b**)

Compound **8b** (2 mmol, 675 mg) and tin (II) chloride dihydrate (10 mmol, 2.26 g) were suspended in absolute ethanol (20 mL). The suspension was carefully set under an argon atmosphere and stirred at 70 °C. After 24 hours, the temperature was reduced to 40 °C and then triethylamine (20.4 mmol, 2.85 mL) and ethyl chloroformate (2.6 mmol, 248 µL) were added respectively. The reaction was stirred for overnight. The suspension was filtered through a protected glass filter and washed with ethanol (2 x 30 mL). The filtrate was concentrated and water was added to precipitate the product. The product was further purified by recrystallization from dichloromethane. Beige coloured solid (yield = 38%); purity 97%; mp: 165-167 °C; <sup>1</sup>H NMR (400 MHz, DMSO-d<sub>6</sub>): δ= 8.58 (s, 1H), 7.65 (m, 2H), 7.60 (m, 2H), 7.50 (m, 5H), 7.56 (m, 1H), 6.48 (d, *J*= 8.0 Hz, 1H), 5.96 (s, 2H), 4.35 (s, 2H), 4.12 (q, *J*= 7.1 Hz, 2H), 1.24 (t, *J*= 7.1 Hz, 3H); <sup>13</sup>C NMR (100 MHz, DMSO-d<sub>6</sub>): δ= 154.9, 154.2, 152.0, 139.6, 139.5, 130.8 (2C), 129.9, 128.9 (2C), 127.5, 126.5 (2C), 126.4 (2C), 120.1, 108.6, 60.6, 58.7, 14.4; IR:  $\tilde{\nu}$  = 3484, 3290, 3161, 1703, 1622, 1460, 1219, 1065, 747 cm<sup>-1</sup>; HRMS-ESI *m/z* [M-H]<sup>-</sup> calcd for C<sub>21</sub>H<sub>21</sub>N<sub>3</sub>O<sub>2</sub>S: 378.1282, found: 378.1272.



Ethyl-{2-amino-6-[(3,5-dimethoxybenzylthio)pyridin-3-yl]}carbamate (**9c**)

Compound **8c** (2.5 mmol, 800 mg) and tin (II) chloride dihydrate (12.5 mmol, 2.82 g) were suspended in absolute alcohol (20 mL). The suspension was carefully set under an argon atmosphere and stirred at 70 °C for overnight. The temperature was lowered to 40 °C. Triethylamine (25.5 mmol, 3.5 mL) and ethyl chloroformate (3.25 mmol, 310 µL) were added sequentially and the mixture was stirred for 4 hours. The mixture was then filtered through a protected glass filter and washed with ethanol (3x 20 mL). The product was separated using column flash chromatography (solvent: n-hexane and ethyl acetate). The fractions that contain the product were combined and evaporated to dryness. The product was dissolved in ethanol and then precipitated with the addition of water. Off-white solid (yield = 52%); purity 100%; mp: 84-85 °C; <sup>1</sup>H NMR (400 MHz, DMSO-d<sub>6</sub>): δ= 8.57 (br s, 1H), 7.41 (d, *J*= 5.1 Hz, 1H), 6.57 (d, *J*= 2.1 Hz, 2H), 6.44 (d, *J*= 8.0 Hz, 1H), 6.34 (t, 1H), 5.94 (s, 2H), 4.22 (s, 2H), 4.12 (q, *J*= 7.1 Hz, 2H), 3.70 (s, 6H), 1.24 (t, *J*= 7.0 Hz, 3H); <sup>13</sup>C NMR (100 MHz, DMSO-d<sub>6</sub>): δ= 160.2 (2C), 154.4, 152.8, 150.4, 140.9, 131.8, 115.2, 109.4, 106.7 (2C), 98.7, 60.3, 55.1 (2C), 33.7, 14.5; IR:  $\tilde{\nu}$  = 3475, 3285, 3163, 2935, 1685, 1598, 1520, 1460, 1202, 1148, 1057 cm<sup>-1</sup>; HRMS-ESI *m/z* [M+H]<sup>+</sup> calcd for C<sub>17</sub>H<sub>21</sub>N<sub>3</sub>O<sub>4</sub>S: 364.1326, found: 364.1317.

Ethyl-{2-amino-6-[(pyridin-2-ylmethylthio)pyridin-3-yl]}carbamate (**9d**)

Compound **8d** (1 mmol, 263 mg) and tin (II) chloride dihydrate (4.6 mmol, 1.04 g) were suspended in ethanol (10 mL). The suspension was carefully set under an argon atmosphere and then stirred at 70 °C for 22 hours. The temperature was lowered to 40 °C. Triethylamine (10.2 mmol, 1.4 mL) and ethyl chloroformate (1.3 mmol, 120 µL) were added respectively and stirred overnight. The filtrate was concentrated and water was added. The product was then partitioned into dichloromethane and packed for flash column chromatography (solvent: dichloromethane and methanol). The fractions containing the product were combined and evaporated to dryness. Brown solid (yield= 30%); purity 100%; mp: 129-131 °C; <sup>1</sup>H NMR (400 MHz, DMSO-d<sub>6</sub>): δ= 8.57 (s, 1H), 8.49 (d, *J*= 4.3 Hz, 1H), 7.73 (m, 1H), 7.50 (d, *J*= 7.8 Hz, 1H), 7.41 (d, *J*= 6.0 Hz, 1H), 7.25 (m, 1H), 6.49 (d, *J*= 8.0 Hz, 1H), 5.94 (s, 2H), 4.39 (s, 2H), 4.12 (q, *J*= 7.1 Hz, 2H), 1.24 (t, *J*= 7.1 Hz, 3H); <sup>13</sup>C NMR (100 MHz, DMSO-d<sub>6</sub>): δ= 158.2, 154.5, 152.8, 150.3, 149.0, 136.7, 131.9, 130.1, 123.1,

122.1, 115.2, 109.2, 60.4, 45.6, 35.7, 14.5; IR:  $\tilde{\nu}$  = 3361, 3227, 2979, 2929, 1721, 1524, 1456, 1245, 1221, 1071  $\text{cm}^{-1}$ ; HRMS-ESI  $m/z$   $[M+H]^+$  calcd for  $\text{C}_{14}\text{H}_{16}\text{N}_4\text{O}_2\text{S}$ : 305.1067, found: 305.1061.

*S*-{6-Amino-5-[(ethoxycarbonyl)amino]pyridin-2-yl} 4-fluorobenzothioate (**9e**)

Compound **8e** (1 mmol, 293 mg) and tin (II) chloride dihydrate (5 mmol, 1.13 g) were suspended in absolute ethanol (10 mL). The suspension was carefully set under argon atmosphere. The suspension was stirred at 70 °C for 48 hours. The temperature was lowered to 40 °C. Triethylamine (10.2 mmol, 1.4 mL) and ethyl chloroformate (2.6 mmol, 240  $\mu\text{L}$ ) were added respectively. After 4 hours of stirring at 40 °C, the reaction was complete. The mixture was filtered through a protected glass filter and washed with ethanol (3 x 20 mL). The product was separated by flash column chromatography (solvent: dichloromethane and ethanol). The product was further purified using preparative HPLC (water and methanol). Off-white solid (yield= 28%); purity 100%; mp: 156-157 °C;  $^1\text{H}$  NMR (400 MHz,  $\text{DMSO-d}_6$ ):  $\delta$ = 8.84 (s, 1H), 8.03 (m, 2H), 7.81 (d,  $J$ = 7.2 Hz, 1H), 7.44 (m, 2H), 6.92 (d,  $J$ = 7.8 Hz, 1H), 6.19 (s, 2H), 4.18 (q,  $J$ = 6.8 Hz, 2H), 1.28 (t,  $J$ = 6.8 Hz, 3H);  $^{13}\text{C}$  NMR (100 MHz,  $\text{DMSO-d}_6$ ):  $\delta$ = 188.2, 166.7 (d,  $J$ = 251 Hz, 1C), 154.2, 132.8, 130.0 (d,  $J$ = 10 Hz, 1C), 119.8, 119.4, 116.5 (d,  $J$ = 23 Hz, 1C), 60.6, 14.4; IR:  $\tilde{\nu}$  = 3434, 3377, 3161, 1736, 1649, 1505, 1470, 1201, 906  $\text{cm}^{-1}$ ; HRMS-ESI  $m/z$   $[M+H]^+$  calcd for  $\text{C}_{15}\text{H}_{14}\text{N}_3\text{O}_3\text{FS}$ : 336.0813, found: 336.0816.

Ethyl {2-amino-6-([2-(piperidin-1-yl)ethylthio]pyridin-3-yl)carbamate (**9f**)

Compound **8f** (1 mmol, 282 mg) and tin (II) chloride dihydrate (4.6 mmol, 1.02g) were suspended in absolute ethanol (10 mL). After carefully setting under argon atmosphere, the suspension was stirred at 70 °C for 25 hours. The temperature was lowered to 40 °C. Triethylamine (10.2 mmol, 1.4 mL) and ethyl chloroformate (2.6 mmol, 240  $\mu\text{L}$ ) were added and the mixture was stirred for 3 hours. The mixture was filtered and washed with ethanol (3 x 20 mL). The filtrate was concentrated and poured into water (50 mL). The product was partitioned into dichloromethane, which was evaporated to dryness in order to give a pure product. Brown coloured solid (yield= 32%); purity 100%; mp: 136-137 °C;  $^1\text{H}$  NMR (400 MHz,  $\text{DMSO-d}_6$ ):  $\delta$ = 8.55 (s, 1H), 7.40 (d,  $J$ = 6.1 Hz, 1H), 6.44 (d,  $J$ = 8.0 Hz, 1H), 5.82 (s, 2H), 4.12 (q,  $J$ = 7.1 Hz, 2H), 3.14 (q,  $J$ = 8.8 Hz, 2H), 2.50 (m, 2H), 2.38 (m, 4H), 1.51 (m, 4H), 1.39 (m, 2H), 1.24 (t,  $J$ = 7.1 Hz, 3H);  $^{13}\text{C}$  NMR (100 MHz,  $\text{DMSO-d}_6$ ):

d<sub>6</sub>):  $\delta$  = 154.5, 152.8, 151.1, 131.9, 114.9, 109.3, 60.3, 58.2, 53.8 (2C), 26.9, 25.5 (2), 24.0, 14.5; IR:  $\tilde{\nu}$  = 3341, 3212, 2934, 1713, 1530, 1452, 1214, 1065 cm<sup>-1</sup>; HRMS-ESI m/z [M+H]<sup>+</sup> calcd for C<sub>15</sub>H<sub>24</sub>N<sub>4</sub>O<sub>2</sub>S: 325.1693, found: 325.1698.

#### *N*-[6-(Benzylthio)-2-(methylamino)pyridin-3-yl]-2-(3,5-difluorophenyl)acetamide (**9g**)

Compound **8g** (2.8 mmol, 771 mg), iron powder (28 mmol, 1.57 g) and ammonium chloride (28 mmol, 1.5 g) were suspended in 15 mL ethanol 20%. The suspension was stirred at 100 °C for 2 hours, filtered over diatomaceous earth, and the filter washed with ethyl acetate. The filtrate was poured into water. The collected precipitate was washed with ethyl acetate. 2,6-Dichlorophenyl acetic acid (2.8 mmol, 600 mg) and *O*-(7-azabenzotriazole-1-yl)-*N,N,N,N'*-tetramethyluroniumhexafluorophosphate (HATU, 5.6 mmol, 2.1 g) were added and the mixture was stirred at 40 °C overnight. The product was separated using silica gel chromatography (solvent: ethyl acetate/hexane). The combined product containing fractions were evaporated to dryness. The residue was dissolved in ethanol and water was added to precipitate the product. Lavender coloured solid (yield = 8%); purity 100%; mp: 201-202 °C; <sup>1</sup>H NMR (400 MHz, DMSO-d<sub>6</sub>):  $\delta$  = 9.25 (s, 1H), 7.40 (m, 2H), 7.30 (m, 4H), 7.13 (m, 3H), 6.41 (d, *J* = 7.8 Hz, 1H), 6.23 (d, *J* = 4.6 Hz, 2H), 4.38 (s, 2H), 3.70 (s, 2H), 2.89 (d, *J* = 4.6 Hz, 2H); <sup>13</sup>C NMR (100 MHz, DMSO-d<sub>6</sub>):  $\delta$  = 168.7, 163.4 (dd, *J* = 13 Hz, *J* = 244 Hz, 2C), 153.2, 151.6, 140.4 (t, *J* = 10 Hz, 1C), 138.9, 133.2, 128.6 (2C), 128.3 (2C), 126.8, 115.1, 112.7 (dd, *J* = 6 Hz, *J* = 17 Hz, 2C), 107.9, 102.2 (t, *J* = 26 Hz, 1C), 41.8, 33.3, 27.9; IR:  $\tilde{\nu}$  = 3442, 3404, 3269, 1652, 1591, 1496, 1389, 1230, 1119, 991, 696 cm<sup>-1</sup>; HRMS-ESI m/z [M-H]<sup>-</sup> calcd for C<sub>14</sub>H<sub>16</sub>N<sub>4</sub>O<sub>2</sub>S: 398.1144, found: 398.1157.

#### Ethyl [6-(4-fluorobenzylthio)-2-methylpyridin-3-yl]carbamate (**9h**)

Compound **8h** (1.8 mmol, 501 mg) and tin (II) chloride dihydrate (9 mmol, 2.03 g) were suspended in absolute ethanol (20 mL). The suspension was carefully set under argon atmosphere. The mixture was stirred at 70 °C for overnight. The temperature was then lowered to 40 °C. Triethylamine (18.36 mmol, 2.56 mL) and ethyl chloroformate (2.34 mmol, 223  $\mu$ L) were added respectively. The reaction mixture was vigorously stirred for 3 hours and then filtered through a glass filter protected with 1 cm layer of diatomaceous earth. The mixture was washed with ethanol (3 x 10 mL). Eventually, the mixture was concentrated and water added to precipitate

the product. Beige coloured solid (yield = 84%); purity 100%; mp: 102-103 °C; <sup>1</sup>H NMR (400 MHz, DMSO-d<sub>6</sub>): δ= 8.99 (s, 1H), 7.60 (d, *J*= 8.4 Hz, 1H), 7.46 (m, 2H), 7.13 (m, 3H), 4.36 (s, 2H), 4.13 (q, *J*= 7.1 Hz, 2H), 2.40 (s, 3H), 1.25 (t, *J*= 7.1 Hz, 3H); <sup>13</sup>C NMR (100 MHz, DMSO-d<sub>6</sub>): δ= 162.3 (d, *J*= 243 Hz, 1C), 154.4, 152.0, 134.7 (d, *J*= 3 Hz, 1C), 132.8, 130.8 (d, *J*= 8 Hz, 2C), 129.5, 119.5, 115.1 (d, *J*=21 Hz, 2C), 60.43, 32.8, 20.8, 14.5; IR:  $\tilde{\nu}$  = 3284, 2980, 1689, 1509, 1442, 1250, 1061 cm<sup>-1</sup>; HRMS-ESI m/z [M+H]<sup>+</sup> calcd for C<sub>16</sub>H<sub>17</sub>N<sub>2</sub>O<sub>2</sub>FS: 321.1068, found: 321.1060.

*N*-[2-Amino-6-(4-fluorobenzylsulfinyl)pyridin-3-yl]-3,4-difluorobenzamide (**10a**)

Compound **9a** (1 mmol, 390 mg) was dissolved in dichloromethane (15 mL) and was allowed to cool using an ice-cold water bath. 3-chloroperbenzoic acid (1.1 mmol, 190 mg) was dissolved in dichloromethane (15 mL) and was added slowly to the reaction mixture. Following the complete addition of 3-chloroperbenzoic acid, the solution was stirred for 1 hour. The solution was concentrated and left in the refrigerator for overnight. The product was collected by filtration and washed with 10% NaHCO<sub>3</sub>. The product was further purified by recrystallization from ethanol. Beige coloured solid (yield = 30%); purity 100%; mp: 118-119 °C; <sup>1</sup>H NMR (400 MHz, DMSO-d<sub>6</sub>): δ= 9.81 (s, 1H), 8.12 (m, 1H), 7.91 (m, 1H), 7.70 (d, *J*= 7.8 Hz, 1H), 7.65 (m, 1H), 7.12 (m, 4H), 6.77 (d, *J*= 7.8 Hz, 1H), 6.51 (s, 2H), 4.38 (d, *J*= 13.0 Hz, 1H), 4.05 (d, *J*= 13.0 Hz, 1H); <sup>13</sup>C NMR (100 MHz, DMSO-d<sub>6</sub>): δ= 163.9, 163.1 (d, *J*= 243 Hz, 1C), 157.5, 154.6, 134.7, 132.3 (d, *J*= 8 Hz, 1C), 131.7, 126.6, 125.6, 119.3, 117.6, 117.4, 115.1 (d, *J*= 21 Hz, 2C), 108.1, 57.6; IR:  $\tilde{\nu}$  = 3470, 3349, 3234, 1657, 1596, 1494, 1456, 1289, 1229, 1042 cm<sup>-1</sup>; HRMS-ESI m/z [M-H]<sup>-</sup> calcd for C<sub>19</sub>H<sub>14</sub>N<sub>3</sub>O<sub>2</sub>F<sub>3</sub>S: 404.0686, found: 404.0701.

Ethyl {6-[(1,1'-biphenyl-4-yl)methylsulfinyl]-2-aminopyridin-3-yl}carbamate (**10b**)

Compound **9b** (0.64 mmol, 241 mg) was dissolved in dichloromethane (15 mL) and was cooled in an ice-cold water bath. 3-chloroperbenzoic acid (0.71 mmol, 122mg) was dissolved in dichloromethane (15 mL) and added slowly to the reaction solution. The solution was stirred for an additional 1 hr, which was then concentrated and left in the refrigerator to allow precipitation of the product. The product was collected by filtration, which was washed with 10% NaHCO<sub>3</sub>. Off-white solid (yield = 88%); purity 100%; mp: 224-225 °C; <sup>1</sup>H NMR (400 MHz, DMSO-d<sub>6</sub>): δ= 8.90 (br s, 1H), 7.86 (d, *J*= 7.8 Hz, 1H), 7.66 (d, *J*= 7.3 Hz, 2H), 7.60 (d, *J*= 8.2 Hz, 2H), 7.45 (t, 2H), 7.38 (t,

1H), 7.19 (d,  $J = 8.2$  Hz, 2H), 6.82 (d,  $J = 7.9$  Hz, 1H), 6.39 (s, 2H), 4.39 (d,  $J = 12.9$  Hz, 1H), 4.16 (q,  $J = 7.1$  Hz, 2H), 4.04 (d,  $J = 12.9$  Hz, 1H), 1.27 (t,  $J = 7.1$  Hz, 3H);  $^{13}\text{C}$  NMR (100 MHz, DMSO- $d_6$ ):  $\delta = 154.9, 154.1, 152, 139.6, 139.5, 130.8$  (2C), 129.9, 128.9 (2C), 127.5, 126.6 (2C), 126.4 (2C), 120.6, 108.6, 60.6, 58.7, 14.4; IR:  $\tilde{\nu} = 3341, 3211, 2988, 1725, 1530, 1465, 1220, 1030, 762$   $\text{cm}^{-1}$ ; HRMS-ESI  $m/z$   $[\text{M}+\text{H}]^+$  calcd for  $\text{C}_{21}\text{H}_{21}\text{N}_3\text{O}_3\text{S}$ : 396.1376, found: 396.1366.

#### Ethyl [2-amino-6-(3,5-dimethoxybenzylsulfinyl)pyridin-3-yl]carbamate (**10c**)

Compound **9c** (0.8 mmol, 291 mg) was dissolved in dichloromethane (15 mL) and was cooled in an ice-cold water bath. 3-chloroperbenzoic acid (0.88 mmol, 152 mg) was dissolved in dichloromethane (15 mL) and was added to the reaction mixture over a period on 1 hour. After full addition of 3-chloroperbenzoic acid, the solution stirred for 1 hr, concentrated and left in the refrigerator for overnight. The precipitate was collected by filtration and washed with 10%  $\text{NaHCO}_3$ . The product was separated using flash column chromatography (solvent: dichloromethane and ethanol). White solid (yield = 18%); purity 100%; mp: 200-202  $^\circ\text{C}$ ;  $^1\text{H}$  NMR (400 MHz, DMSO- $d_6$ ):  $\delta = 8.88$  (s, 1H), 7.84 (d,  $J = 7.8$  Hz, 1H), 6.83 (d,  $J = 7.9$  Hz, 1H), 6.40 (t, 1H), 6.37 (s, 2H), 6.23 (d,  $J = 2.2$  Hz, 2H), 4.25 (d,  $J = 12.8$  Hz, 1H), 4.17 (q,  $J = 7.1$  Hz, 2H), 3.93 (d,  $J = 12.8$  Hz, 1H), 3.65 (s, 6H), 1.27 (t,  $J = 7.1$  Hz, 3H);  $^{13}\text{C}$  NMR (100 MHz, DMSO- $d_6$ ):  $\delta = 160.0$  (2C), 154.9, 154.2, 152.1, 132.7, 129.7, 120.5, 108.7, 108.1 (2C), 99.8, 60.7, 59.1, 55.1 (2C), 14.4; IR:  $\tilde{\nu} = 3340, 3210, 1732, 1595, 1524, 1208, 1036$   $\text{cm}^{-1}$ ; HRMS-ESI  $m/z$   $[\text{M}+\text{H}]^+$  calcd for  $\text{C}_{17}\text{H}_{21}\text{N}_3\text{O}_5\text{S}$ : 380.1275, found: 380.1274.

#### Ethyl [6-(4-fluorobenzylsulfinyl)-2-methylpyridin-3-yl]carbamate (**10d**)

Compound **9d** (0.8 mmol, 275 mg) was dissolved in dichloromethane (15 mL). The solution was put in an ice-cold water bath. 3-Chloroperbenzoic acid (0.88 mmol, 152 mg) was dissolved in dichloromethane (15 mL) and added to the reaction solution slowly over a period of 1 hour. After complete addition, the solution was stirred for another 1 hour. The solution was then concentrated and left in the refrigerator to allow the precipitation of the product. The product was washed with 10%  $\text{NaHCO}_3$  and dried under reduced pressure. White solid (yield = 25%); purity 100%; mp: 155-156  $^\circ\text{C}$ ;  $^1\text{H}$  NMR (400 MHz, DMSO- $d_6$ ):  $\delta = 9.28$  (s, 1H), 8.03 (d,  $J = 8.4$  Hz, 1H), 7.37 (d,  $J = 8.3$  Hz, 1H), 7.10 (m, 4H), 4.39 (d,  $J = 13.08$  Hz, 1H), 4.19 (q,  $J = 7.1$  Hz, 2H), 4.07 (d,

$J = 13.08$  Hz, 1H), 1.28 (t,  $J = 7.1$  Hz, 3H);  $^{13}\text{C}$  NMR (100 MHz, DMSO- $d_6$ ):  $\delta = 163.1$  (d,  $J = 244$  Hz, 1C), 156.6, 154.1, 151.3, 134.2, 132.3 (d,  $J = 8$  Hz, 2C), 131.4, 126.3 (d,  $J = 3$  Hz, 1C), 118.2, 115.0 (d,  $J = 22$  Hz, 2C), 60.8, 57.9, 21.0, 14.4; IR:  $\tilde{\nu} = 3164, 3058, 2994, 1712, 1528, 1231, 1040, 870$   $\text{cm}^{-1}$ ; HRMS-ESI  $m/z$   $[\text{M}+\text{H}]^+$  calcd for  $\text{C}_{16}\text{H}_{17}\text{N}_2\text{O}_3\text{FS}$ : 337.1017, found: 337.1008.

#### Determination of $\text{LogD}_{7.4}$

$\text{LogD}_{7.4}$  values were determined using a HPLC method. Column: Phenomenex Kinetex PFP 2.6  $\mu\text{M}$  75 $\times$ 4.6 mm, flow rate 0.5 mL/min, mobile phase: **A**: 95% ammonium formate buffer (21.05 mM, pH 7.4) and 5% methanol, **B** 5% ammonium formate buffer (0.36 mM, pH 7.4) and 95% methanol, gradient: 0-50 min 0  $\rightarrow$  100% **B**, 50-52 min 100  $\rightarrow$  0% **B**, 52-60 min 0% **B**.

## 2-Amino-6-chloro-3-nitropyridine (6a)

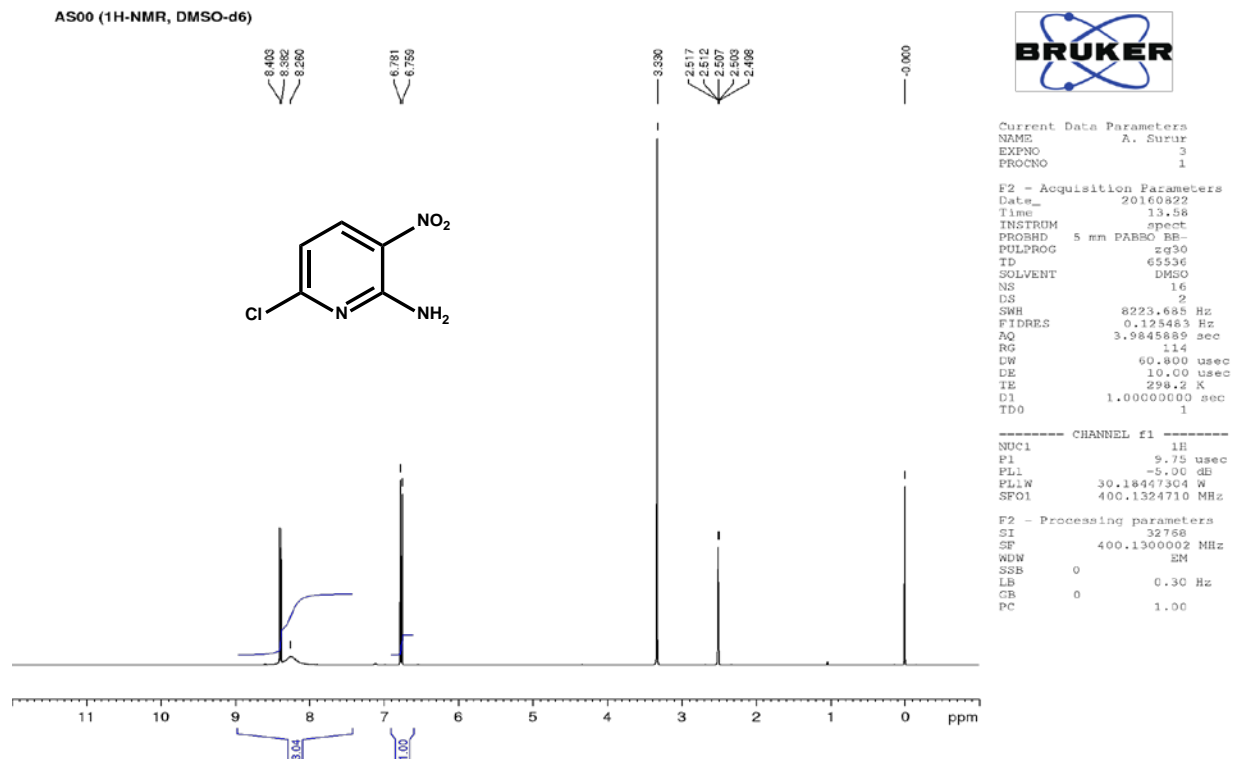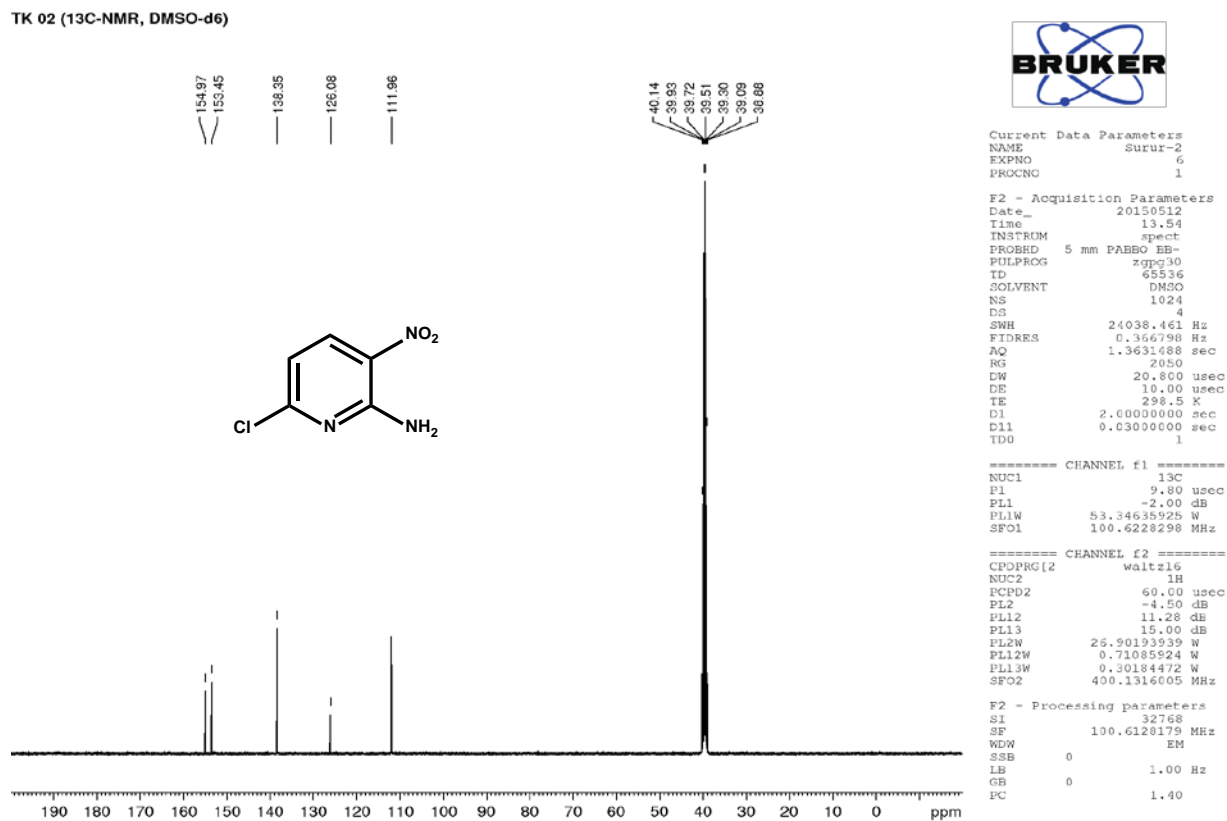

# 6-Chloro-N-methyl-3-nitropyridin-2-amine (6b)

AS-54 (1H-NMR, DMSO-d6)

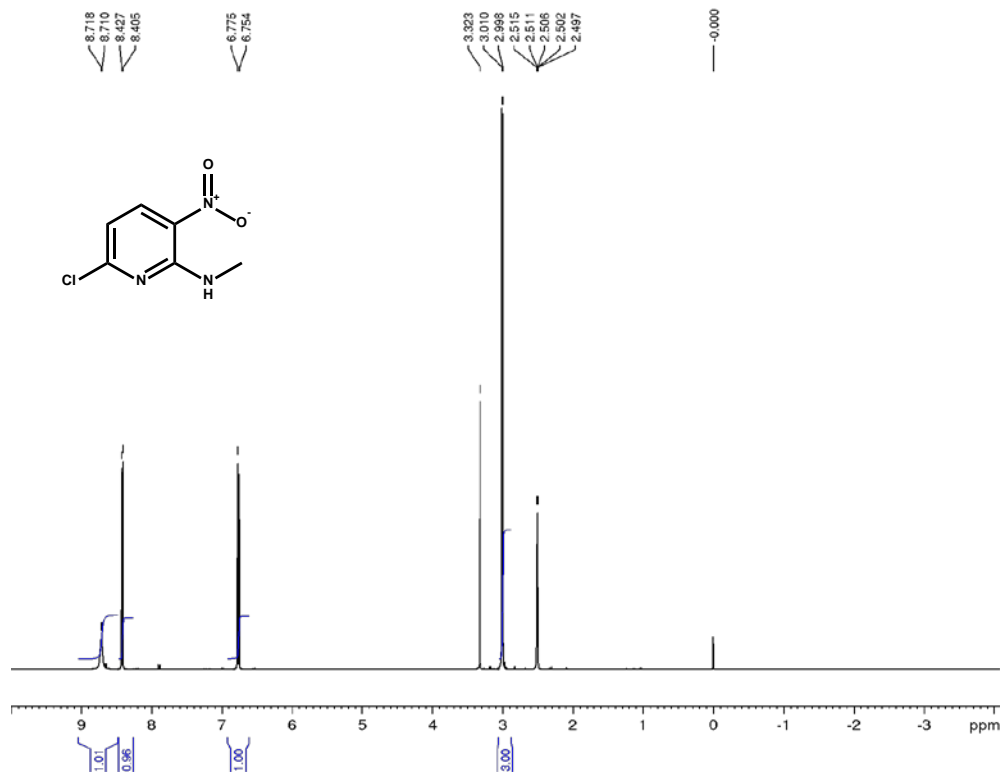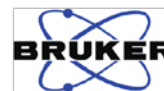

Current Data Parameters  
 NAME A. Surur  
 EXPNO 393  
 PROCNO 1

F2 - Acquisition Parameters  
 Date\_ 20170718  
 Time 10.17  
 INSTRUM spect  
 PROBEHD 5 mm PABEO BB-  
 PULPROG zg30  
 TD 65536  
 SOLVENT DMSO  
 NS 16  
 DS 2  
 SWH 8223.685 Hz  
 FIDRES 0.125483 Hz  
 AQ 3.9845889 sec  
 RG 114  
 DW 60.800 usec  
 DE 10.00 usec  
 TE 298.2 K  
 D1 1.0000000 sec  
 TDO 1

----- CHANNEL f1 -----  
 NUC1 1H  
 P1 9.75 usec  
 PL1 -5.00 dB  
 PL1W 30.18447304 W  
 SFO1 400.1324710 MHz

F2 - Processing parameters  
 SI 32768  
 SF 400.1300007 MHz  
 WDW EM  
 SSB 0  
 LB 0.30 Hz  
 GB 0  
 PC 1.00

AS-54 (13C-NMR, DMSO-d6)

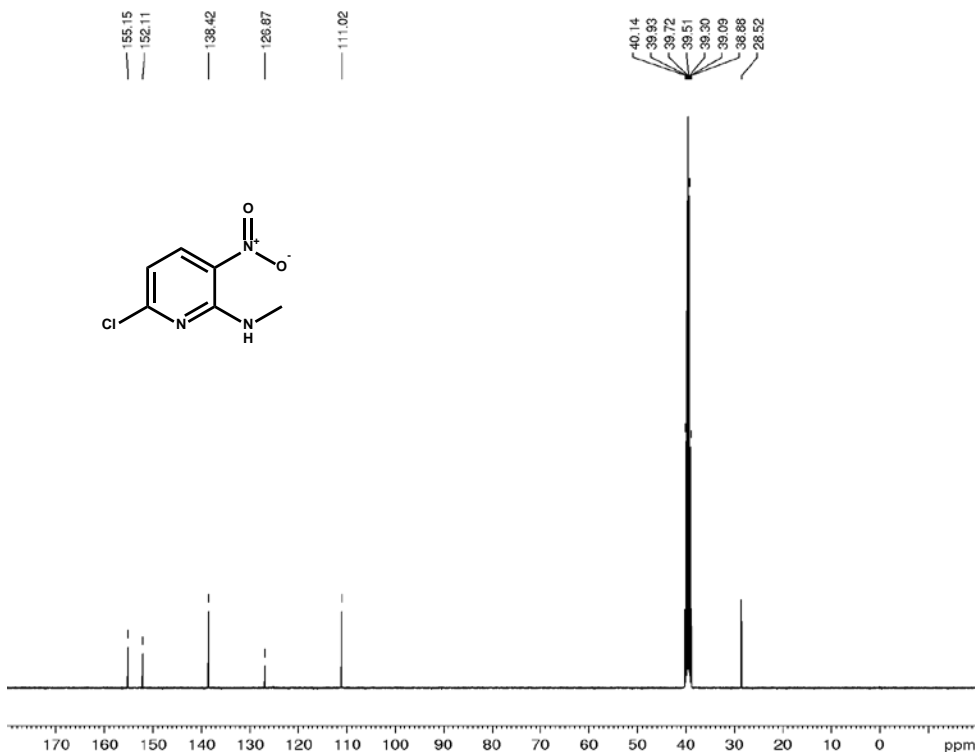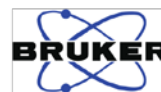

Current Data Parameters  
 NAME A. Surur  
 EXPNO 399  
 PROCNO 1

F2 - Acquisition Parameters  
 Date\_ 20170719  
 Time 5.26  
 INSTRUM spect  
 PROBEHD 5 mm PABEO BB-  
 PULPROG zgpg30  
 TD 65536  
 SOLVENT DMSO  
 NS 4000  
 DS 4  
 SWH 24038.461 Hz  
 FIDRES 0.366798 Hz  
 AQ 1.3631488 sec  
 RG 2050  
 DW 20.800 usec  
 DE 10.00 usec  
 TE 298.2 K  
 D1 2.0000000 sec  
 D11 0.0300000 sec  
 TDO 1

----- CHANNEL f1 -----  
 NUC1 13C  
 P1 10.00 usec  
 PL1 -2.70 dB  
 PL1W 62.6765096 W  
 SFO1 100.6228298 MHz

----- CHANNEL f2 -----  
 CPDPRG2 waltz16  
 NUC2 1H  
 ECPD2 60.00 usec  
 PL2 -5.00 dB  
 PL12 10.78 dB  
 PL13 15.00 dB  
 PL2W 30.18447304 W  
 PL12W 0.79759723 W  
 PL13W 0.30184472 W  
 SFO2 400.1316005 MHz

F2 - Processing parameters  
 SI 32768  
 SF 100.6128187 MHz  
 WDW EM  
 SSB 0  
 LB 1.00 Hz  
 GB 0  
 PC 1.40



# 6-Amino-5-nitropyridine-2-thiol (7a)

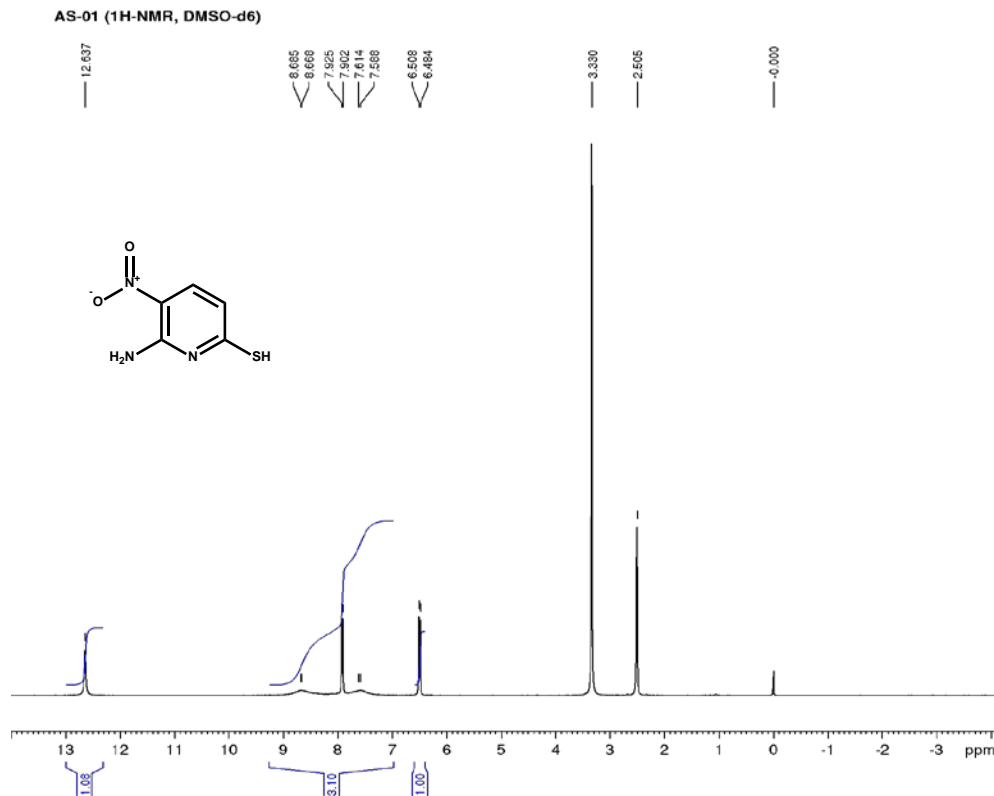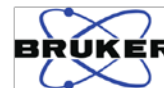

```

Current Data Parameters
NAME      A. Surur
EXPNO    193
PROCNO   1

F2 - Acquisition Parameters
Date_    20170316
Time     9.41
INSTRUM spect
PROBHD   5 mm PABBO BS-
PULPROG zg30
TD       65536
SOLVENT  DMSO
NS       16
DS       2
SWH      8223.685 Hz
FIDRES   0.125483 Hz
AQ       3.9845889 sec
RG       114
DW       60.800 usec
DE       10.00 usec
TE       298.2 K
D1       1.0000000 sec
TD0      1

===== CHANNEL f1 =====
NUC1     1H
P1       9.75 usec
PL1     -5.00 dB
PL1W    30.18447304 W
SFO1    400.1324710 MHz

F2 - Processing parameters
SI       32768
SF      400.1300010 MHz
NDW      EM
SSB      0
LB       0.30 Hz
GB       0
PC       1.00
    
```

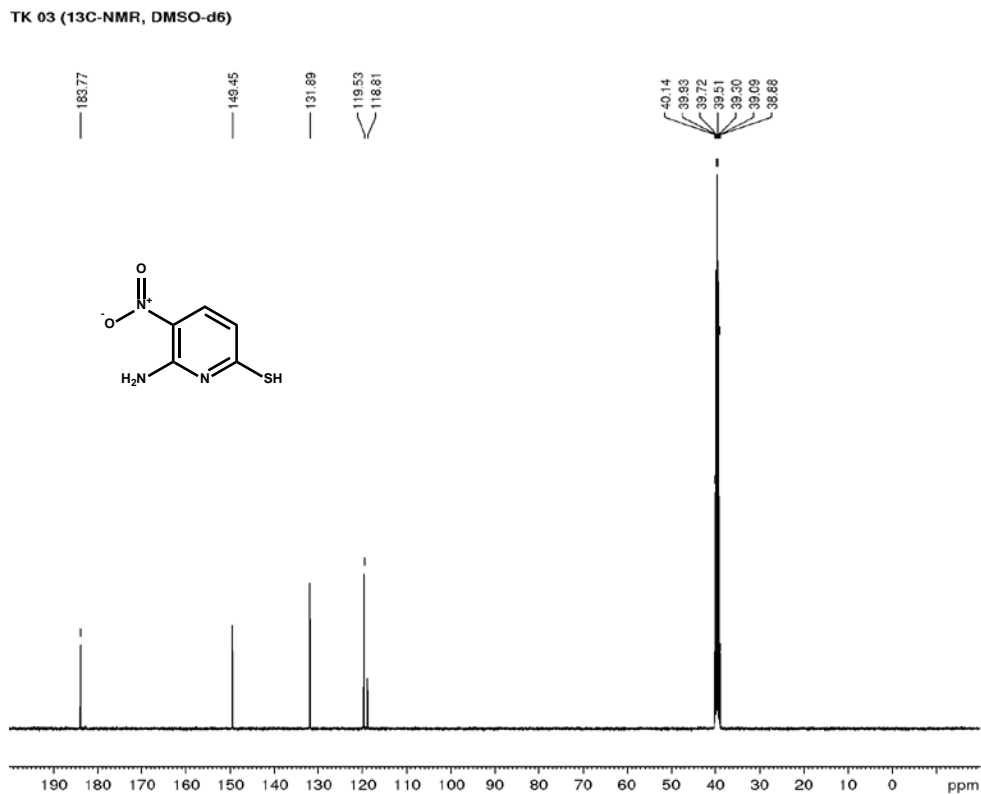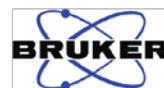

```

Current Data Parameters
NAME      Surur-2
EXPNO    8
PROCNO   1

F2 - Acquisition Parameters
Date_    20150518
Time     14.01
INSTRUM spect
PROBHD   5 mm PABBO BB-
PULPROG zgpg30
TD       65536
SOLVENT  DMSO
NS       1024
DS       4
SWH      24038.461 Hz
FIDRES   0.366798 Hz
AQ       1.3631488 sec
RG       2050
DW       20.800 usec
DE       10.00 usec
TE       298.1 K
D1       2.0000000 sec
D11     0.03000000 sec
TD0      1

===== CHANNEL f1 =====
NUC1     13C
P1       9.80 usec
PL1     -2.00 dB
PL1W    53.34635925 W
SFO1    100.6228298 MHz

===== CHANNEL f2 =====
CPDPRG2  waltz16
NUC2     1H
PCPD2   60.00 usec
PL2     -4.50 dB
PL12    11.28 dB
PL13    15.00 dB
PL2W    26.90193939 W
PL12W   0.71085924 W
PL13W   0.30184472 W
SFO2    400.1316005 MHz

F2 - Processing parameters
SI       32768
SF      100.6128167 MHz
WDW      EM
SSB      0
LB       1.00 Hz
GB       0
PC       1.40
    
```

# 6-(Methylamino)-5-nitropyridine-2-thiol (**7b**)

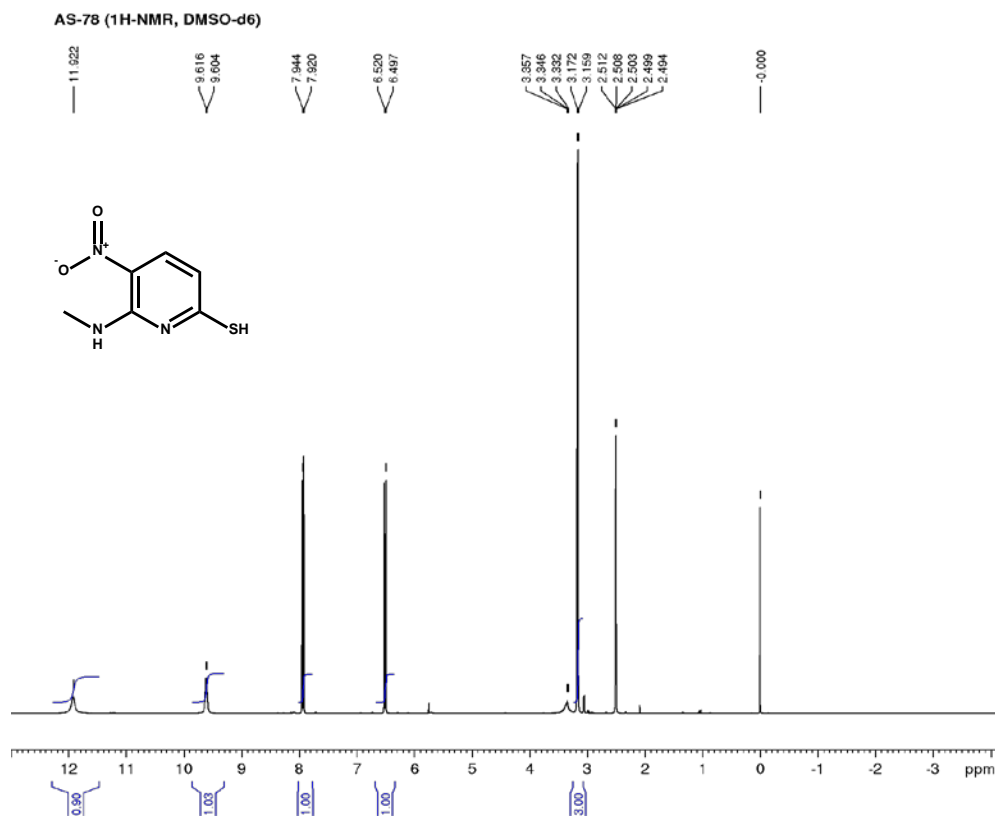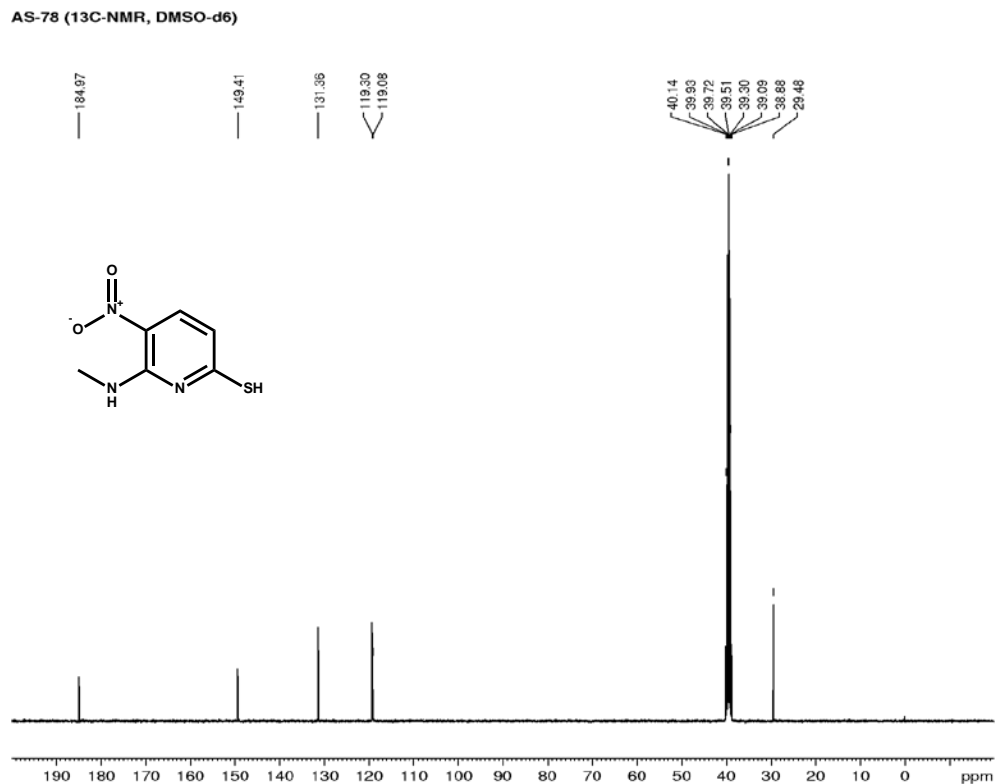

# 6-Methyl-5-nitropyridine-2-thiol (7c)

AS-43 (1H-NMR, DMSO-d6)

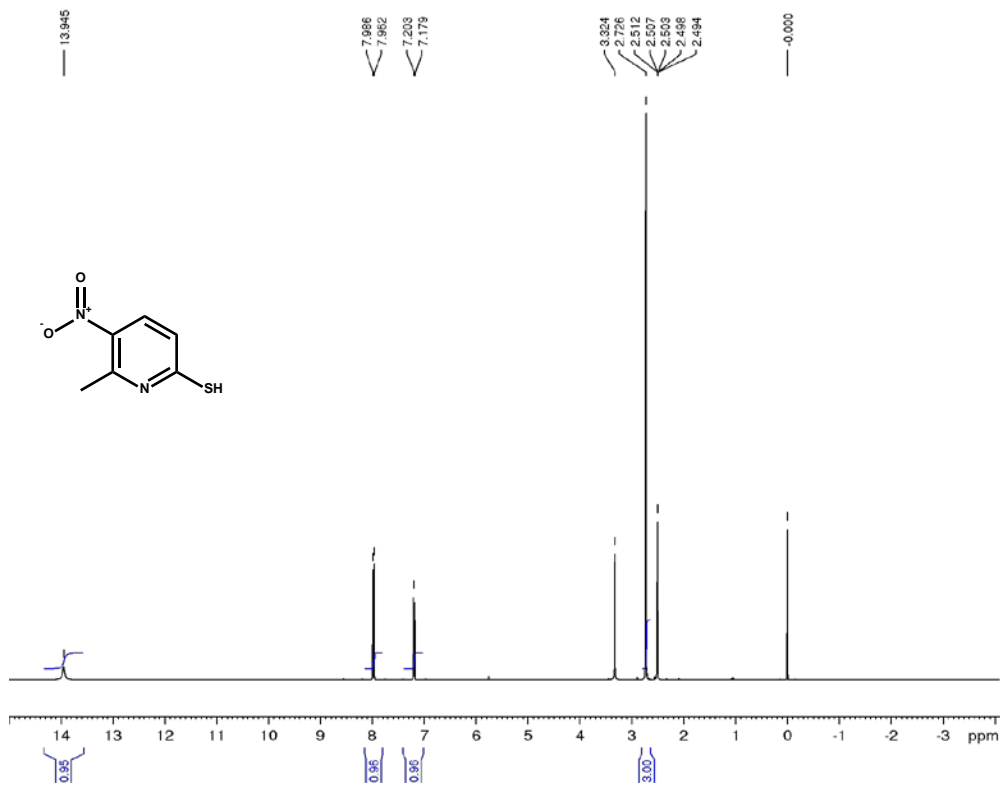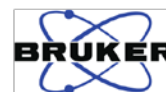

```
Current Data Parameters
NAME      A. Surur
EXPNO    337
PROCNO   1

F2 - Acquisition Parameters
Date_    20170630
Time     13.30
INSTRUM  spect
PROBHD   5 mm PABBO BB-
PULPROG  zg30
TD       65536
SOLVENT  DMSO
NS       16
DS       2
SWH      8223.665 Hz
FIDRES   0.125483 Hz
AQ       3.9845869 sec
RG       128
DW       60.600 usec
DE       10.00 usec
TE       298.2 K
D1       1.0000000 sec
TD0      1

===== CHANNEL f1 =====
NUC1     1H
P1       9.75 usec
PL1      -5.00 dB
PL1W     30.18447304 W
SFO1     400.1324710 MHz

F2 - Processing parameters
SI       32768
SF       400.1300022 MHz
WDW      EM
SSB      0
LB       0.30 Hz
GB       0
PC       1.00
```

AS-43 (13C-NMR, DMSO-d6)

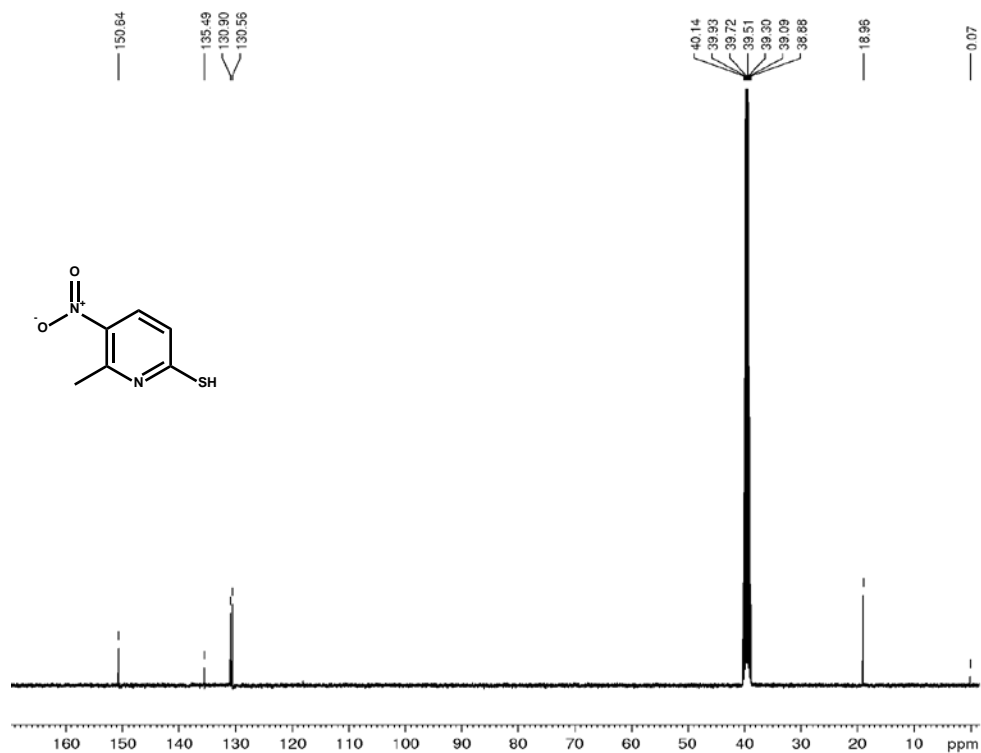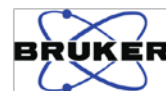

```
Current Data Parameters
NAME      A. Surur
EXPNO    339
PROCNO   1

F2 - Acquisition Parameters
Date_    20170703
Time     18.29
INSTRUM  spect
PROBHD   5 mm PABBO BB-
PULPROG  zgpg30
TD       65536
SOLVENT  DMSO
NS       1024
DS       4
SWH      24038.461 Hz
FIDRES   0.366798 Hz
AQ       1.3631488 sec
RG       2050
DW       20.800 usec
DE       10.00 usec
TE       300.2 K
D1       2.0000000 sec
D11      0.0300000 sec
TD0      1

===== CHANNEL f1 =====
NUC1     13C
P1       10.00 usec
PL1      -2.70 dB
PL1W     62.67650986 W
SFO1     100.6228298 MHz

===== CHANNEL f2 =====
CPDPRG12 waltz16
NUC2     1H
PCPD2    60.00 usec
PL2      -5.00 dB
PL12     10.78 dB
PL13     15.00 dB
PL1W     30.18447304 W
PL12W    0.79759723 W
PL13W    0.30184472 W
SFO2     400.1316005 MHz

F2 - Processing parameters
SI       32768
SF       100.6128191 MHz
WDW      EM
SSB      0
LB       1.00 Hz
GB       0
PC       1.40
```

# 6-[(4-Fluorobenzyl)thio]-3-nitropyridin-2-amine (8a)

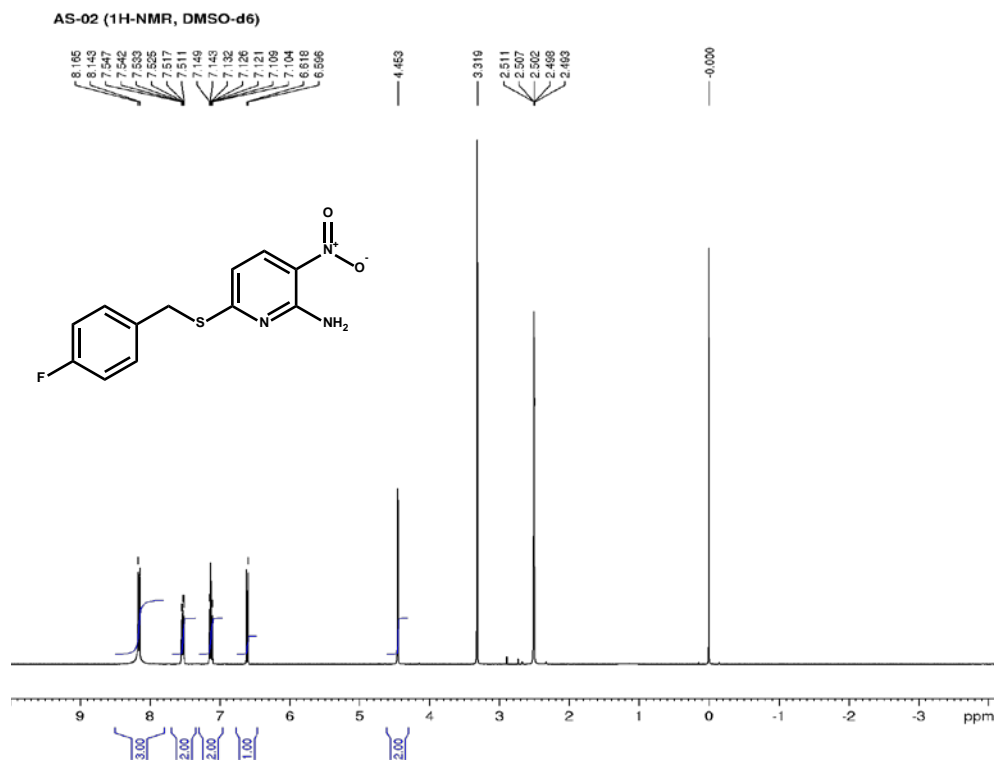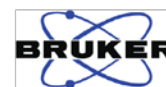

Current Data Parameters

```

NAME      A. Surur
EXPNO     17
PROCNO    1

F2 - Acquisition Parameters
Date_     20160919
Time      9.16
INSTRUM   spect
PROBHD    5 mm PABBO BB-
PULPROG   zg30
TD         65536
SOLVENT   DMSO
NS         16
DS         2
SWH        8223.685 Hz
FIDRES     0.125483 Hz
AQ         3.9845889 sec
RG         114
DW         60.800 usec
DE         10.00 usec
TE         298.2 K
D1         1.0000000 sec
TDD        1

----- CHANNEL f1 -----
NUC1      1H
P1        9.75 usec
PL1       -5.00 dB
PL1W      30.18447304 W
SFO1      400.1324710 MHz

F2 - Processing parameters
SI        32768
SF        400.1300023 MHz
WDW       EM
SSB       0
LB        0.30 Hz
GB        0
PC        1.00
    
```

## TK 04 (13C-NMR, DMSO-d6)

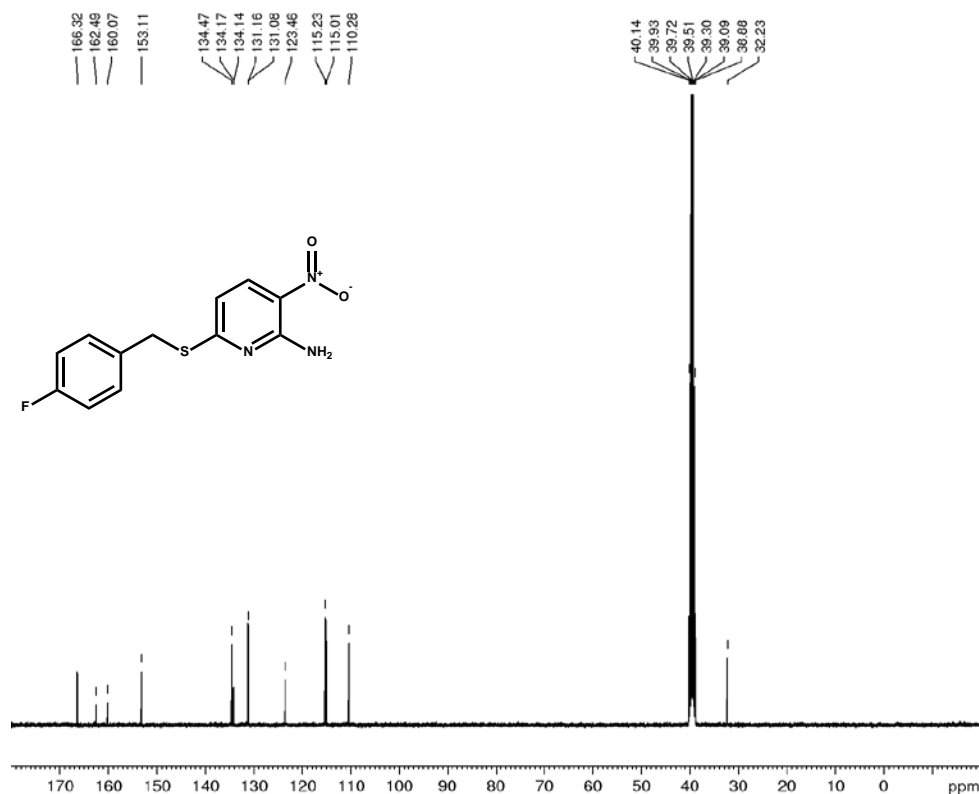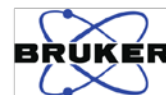

Current Data Parameters

```

NAME      Surur-2
EXPNO     15
PROCNO    1

F2 - Acquisition Parameters
Date_     20150527
Time      12.18
INSTRUM   spect
PROBHD    5 mm PABBO BB-
PULPROG   zgpg30
TD         65536
SOLVENT   DMSO
NS         1024
DS         4
SWH        24038.461 Hz
FIDRES     0.366798 Hz
AQ         1.3631488 sec
RG         2050
DW         20.800 usec
DE         10.00 usec
TE         297.9 K
D1         2.0000000 sec
D11        0.0300000 sec
TDD        1

----- CHANNEL f1 -----
NUC1      13C
P1        9.80 usec
PL1       -2.00 dB
PL1W      53.34635925 W
SFO1      100.6228298 MHz

===== CHANNEL f2 =====
CPDPRG[2] waltz16
NUC2      1H
FCPD2     60.00 usec
PL2       -4.50 dB
PL12      11.23 dB
PL13      15.00 dB
PL2W      25.90193939 W
PL12W     0.71085924 W
PL13W     0.30184472 W
SFO2      400.1316005 MHz

F2 - Processing parameters
SI        32768
SF        100.6128178 MHz
WDW       EM
SSB       0
LB        1.00 Hz
GB        0
PC        1.40
    
```

6-[(1,1'-Biphenyl-4-yl)methylthio]-3-nitropyridin-2-amine (**8b**)

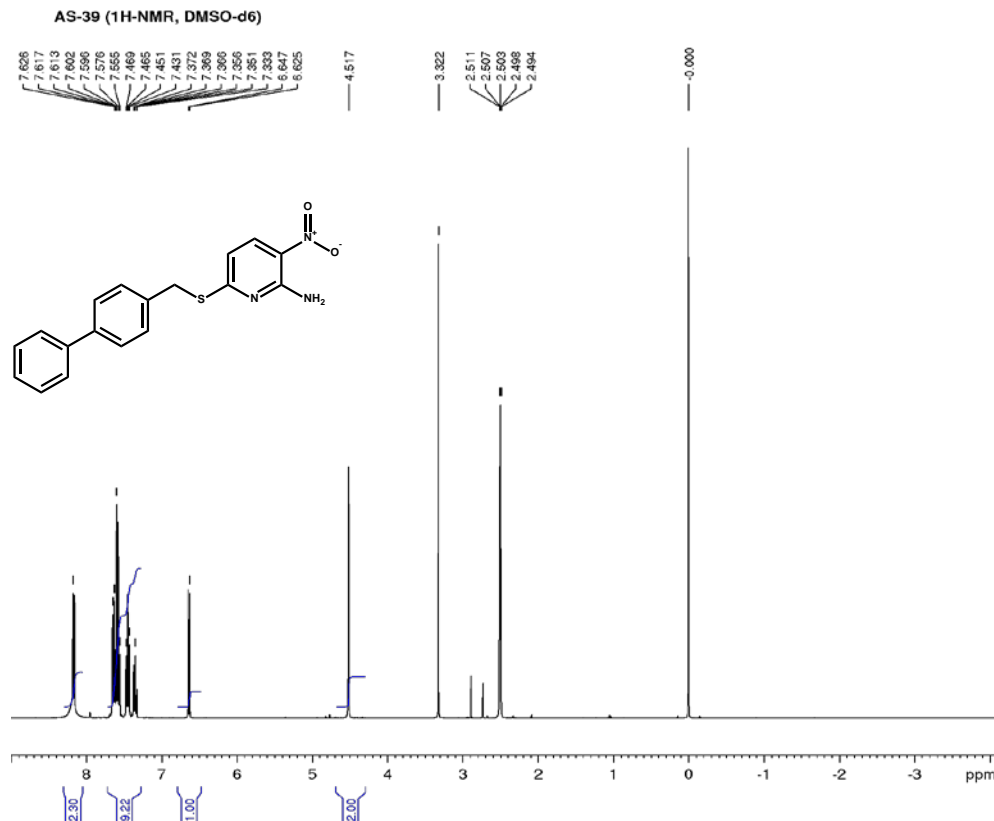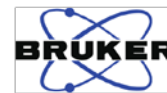

Current Data Parameters  
 NAME A. Surur  
 EXPNO 313  
 PROCNO 1

F2 - Acquisition Parameters  
 Date\_ 20170608  
 Time 9.54  
 INSTRUM spect  
 PROBHD 5 mm PABBO BB-  
 PULPROG zg30  
 TD 65535  
 SOLVENT DMSO  
 NS 16  
 DS 2  
 SWH 8223.685 Hz  
 FIDRES 0.125483 Hz  
 AQ 3.9845809 sec  
 RG 128  
 DW 60.800 usec  
 DE 10.00 usec  
 TE 298.2 K  
 D1 1.00000000 sec  
 TD0 1

===== CHANNEL f1 =====  
 NUC1 1H  
 P1 9.75 usec  
 PL1 -5.00 dB  
 PL1W 30.18447304 W  
 SFO1 400.1324710 MHz

F2 - Processing parameters  
 SI 32768  
 SF 400.1300021 MHz  
 WDW EM  
 SSB 0  
 LB 0.30 Hz  
 GB 0  
 PC 1.00

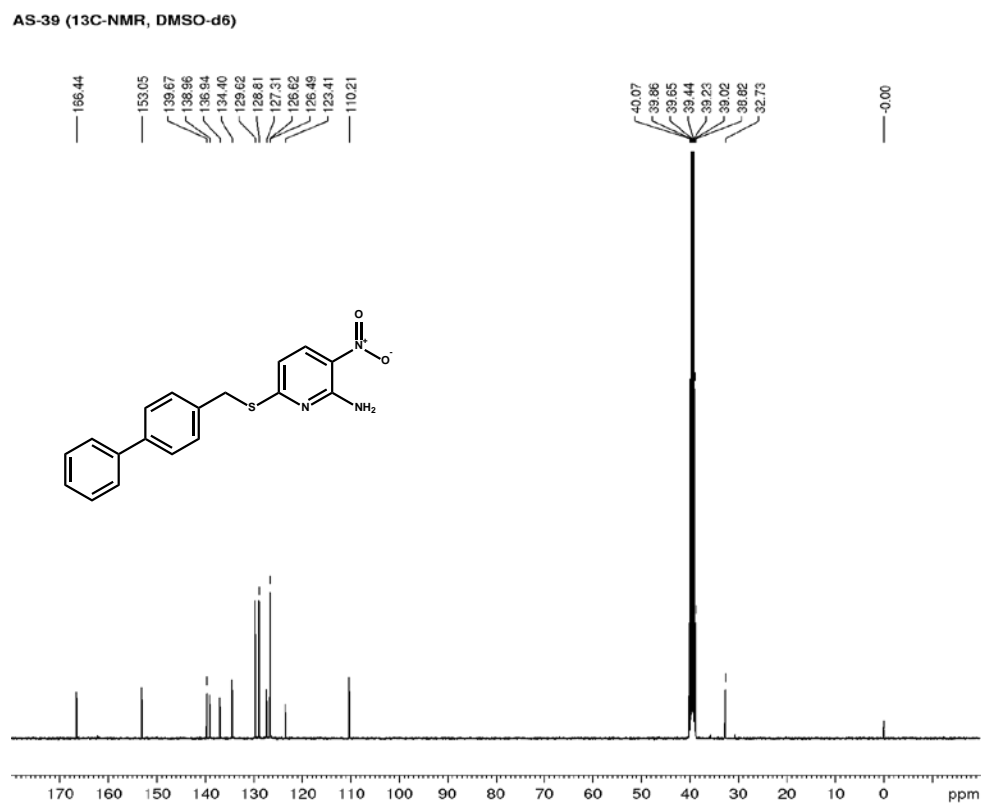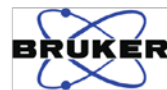

Current Data Parameters  
 NAME A. Surur  
 EXPNO 314  
 PROCNO 1

F2 - Acquisition Parameters  
 Date\_ 20170608  
 Time 20.19  
 INSTRUM spect  
 PROBHD 5 mm PABBO BB-  
 PULPROG zgpg30  
 TD 65536  
 SOLVENT DMSO  
 NS 5000  
 DS 4  
 SWH 24038.461 Hz  
 FIDRES 0.366798 Hz  
 AQ 1.3631488 sec  
 RG 2050  
 DW 20.800 usec  
 DE 10.00 usec  
 TE 299.2 K  
 D1 2.00000000 sec  
 D11 0.03000000 sec  
 TD0 1

===== CHANNEL f1 =====  
 NUC1 13C  
 P1 10.00 usec  
 PL1 -2.70 dB  
 PL1W 62.67650986 W  
 SFO1 100.6228298 MHz

===== CHANNEL f2 =====  
 CPDPRG[2] waltz16  
 NUC2 1H  
 FCPD2 60.00 usec  
 PL2 -5.00 dB  
 PL12 10.78 dB  
 PL13 15.00 dB  
 PL2W 30.18447304 W  
 PL12W 0.79759723 W  
 PL13W 0.30184472 W  
 SFO2 400.1316005 MHz

F2 - Processing parameters  
 SI 32768  
 SF 100.6128263 MHz  
 WDW EM  
 SSB 0  
 LB 1.00 Hz  
 GB 0  
 PC 1.40

# 6-[(3,5-Dimethoxybenzyl)thio]-3-nitropyridin-2-amine (8c)

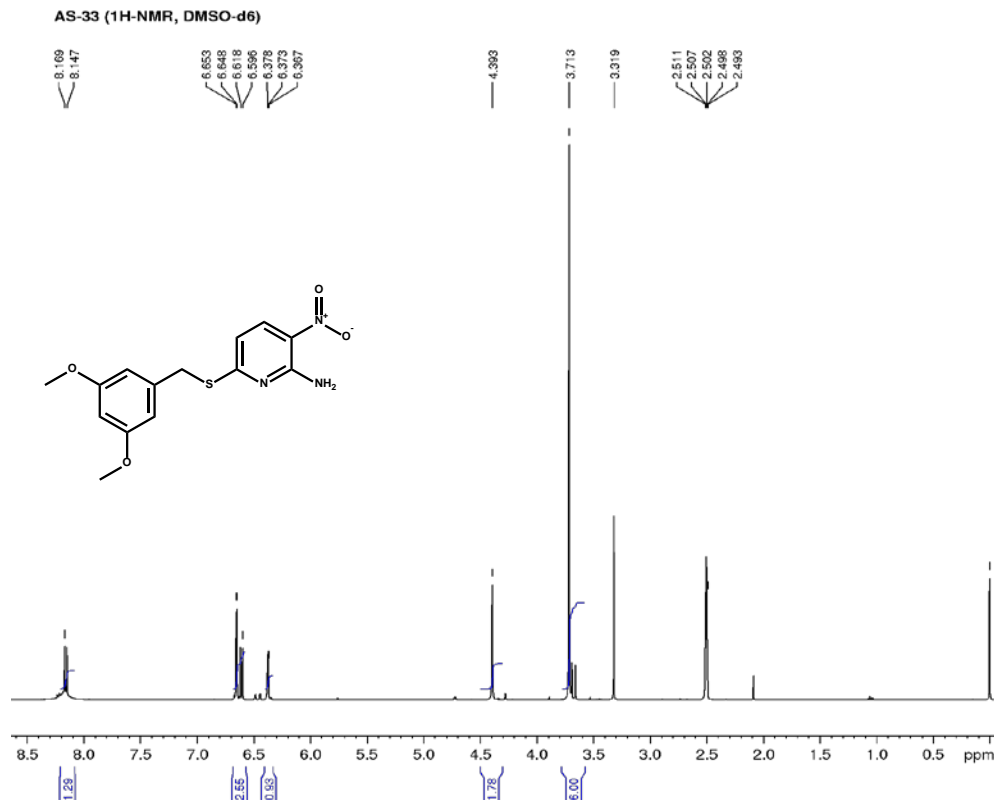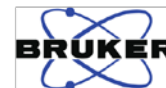

```

Current Data Parameters
NAME      A. Surur
EXPNO    280
PROCNO   1

F2 - Acquisition Parameters
Date_    20170515
Time     9.28
INSTRUM spect
PROBHD   5 mm PABBO BB-
PULPROG zg30
TD       65536
SOLVENT  DMSO
NS       16
DS       2
SWH      8223.685 Hz
FIDRES   0.125483 Hz
AQ       3.9845889 sec
RG       114
DW       60.800 usec
DE       10.00 usec
TE       298.2 K
D1       1.00000000 sec
TD0      1

----- CHANNEL f1 -----
NUC1     1H
P1       9.75 usec
PL1      -5.00 dB
PL1W     30.18447304 W
SFO1     400.1324710 MHz

F2 - Processing parameters
SI       32768
SF       400.1300023 MHz
WDW      EM
SSB      0
LB       0.30 Hz
GB       0
PC       1.00
    
```

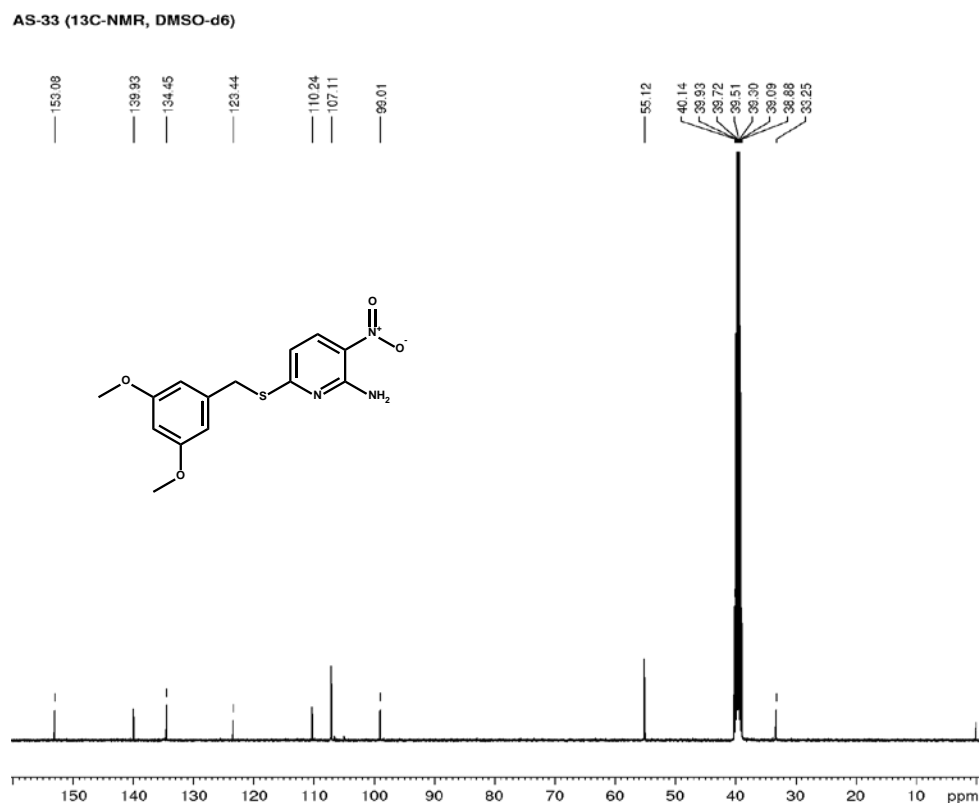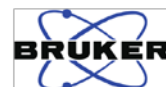

```

Current Data Parameters
NAME      A. Surur
EXPNO    281
PROCNO   1

F2 - Acquisition Parameters
Date_    20170515
Time     19.22
INSTRUM spect
PROBHD   5 mm PABBO BB-
PULPROG zgpg30
TD       65536
SOLVENT  DMSO
NS       4000
DS       4
SWH      24038.461 Hz
FIDRES   0.366798 Hz
AQ       1.3631488 sec
RG       2050
DW       20.800 usec
DE       10.00 usec
TE       301.2 K
D1       2.00000000 sec
D11      0.03000000 sec
TD0      1

----- CHANNEL f1 -----
NUC1     13C
P1       10.00 usec
PL1      -2.70 dB
PL1W     62.67650986 W
SFO1     100.6220298 MHz

----- CHANNEL f2 -----
CPDPRG[2] waltz16
NUC2     1H
PCPD02   60.00 usec
PL2      -5.00 dB
PL12     10.78 dB
PL13     15.00 dB
PL2W     30.18447304 W
PL12W    0.79759723 W
PL13W    0.30184472 W
SFO2     400.1316005 MHz

F2 - Processing parameters
SI       32768
SF       100.6120199 MHz
WDW      EM
SSB      0
LB       1.00 Hz
GB       0
PC       1.40
    
```

### 3-Nitro-6-[(pyridin-2-ylmethyl)thio]pyridin-2-amine (**8d**)

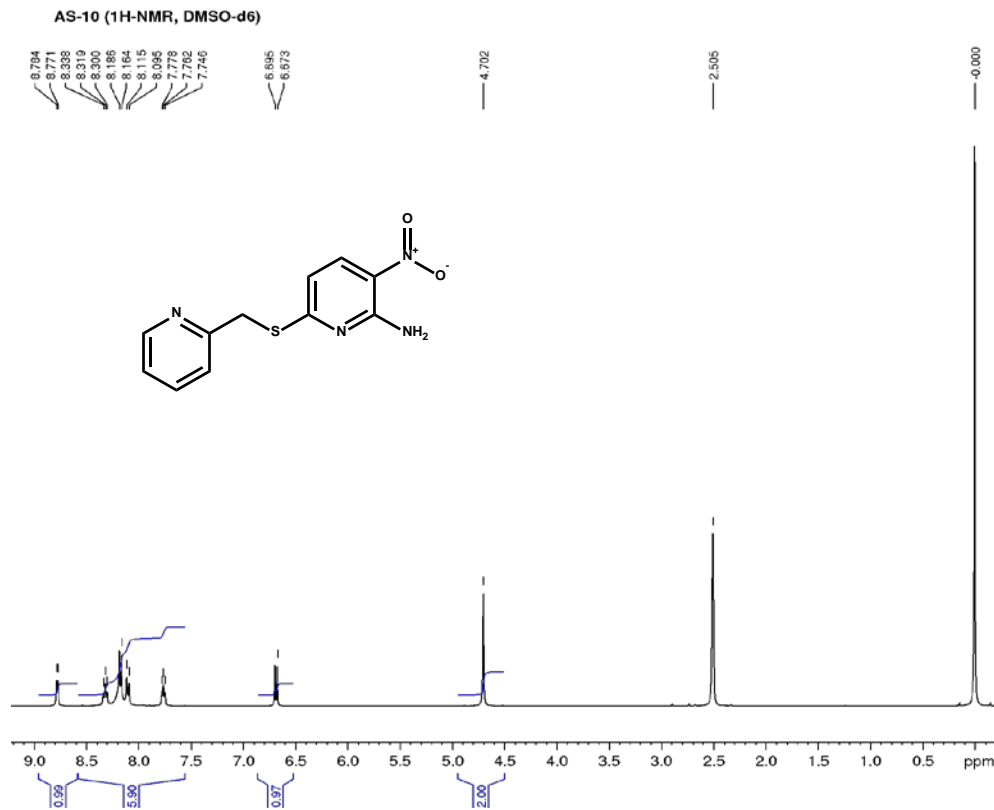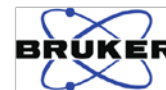

Current Data Parameters  
 NAME A. Surur  
 EXPNO 103  
 PROCNO 1

F2 - Acquisition Parameters  
 Date\_ 20170105  
 Time 13.40  
 INSTRUM spect  
 PROBHD 5 mm PABBO BB-  
 PULPROG zg30  
 TD 65536  
 SOLVENT DMSO  
 NS 16  
 DS 2  
 SWH 8223.685 Hz  
 FIDRES 0.125483 Hz  
 AQ 3.9845889 sec  
 RG 101  
 DW 60.800 usec  
 DE 10.00 usec  
 TE 298.2 K  
 D1 1.0000000 sec  
 TDO 1

----- CHANNEL f1 -----  
 NUC1 1H  
 P1 9.75 usec  
 PL1 -5.00 dB  
 PL1W 30.18447304 W  
 SFO1 400.1324710 MHz

F2 - Processing parameters  
 SI 32768  
 SF 400.1300008 MHz  
 WDW EM  
 SSB 0  
 LB 0.30 Hz  
 GB 0  
 PC 1.00

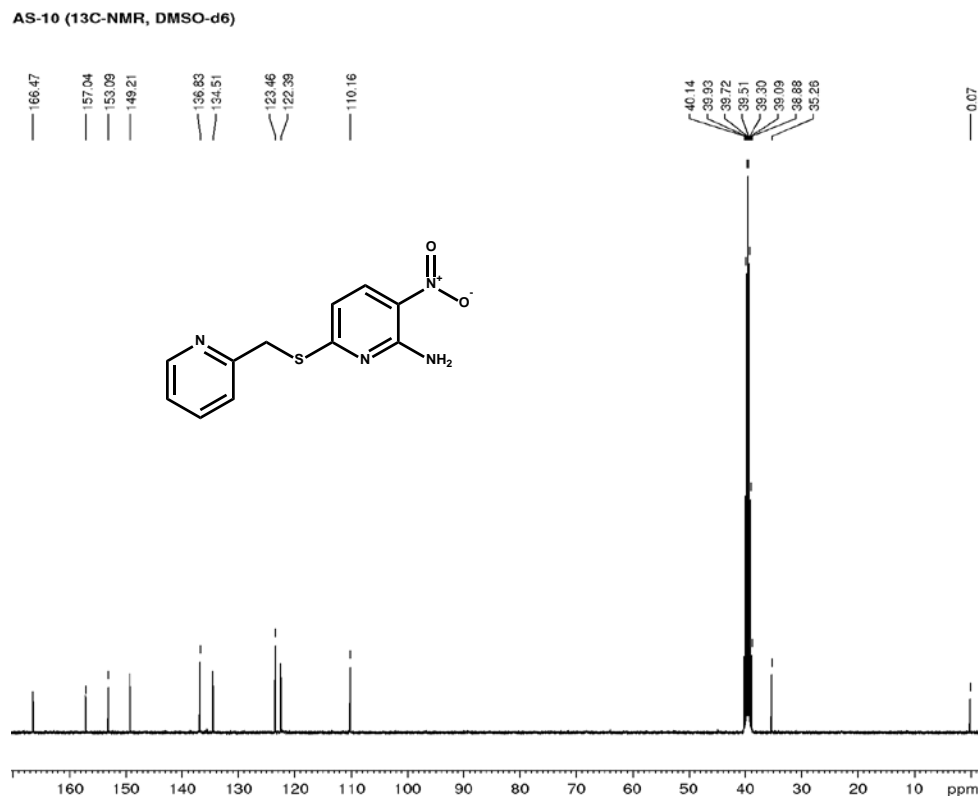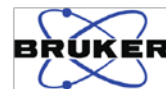

Current Data Parameters  
 NAME A. Surur  
 EXPNO 49  
 PROCNO 1

F2 - Acquisition Parameters  
 Date\_ 20161121  
 Time 12.16  
 INSTRUM spect  
 PROBHD 5 mm PABBO BB-  
 PULPROG zgpg30  
 TD 65536  
 SOLVENT DMSO  
 NS 1024  
 DS 4  
 SWH 24038.461 Hz  
 FIDRES 0.366798 Hz  
 AQ 1.3631488 sec  
 RG 2050  
 DW 20.800 usec  
 DE 10.00 usec  
 TE 299.2 K  
 D1 2.0000000 sec  
 D11 0.0300000 sec  
 TDO 1

----- CHANNEL f1 -----  
 NUC1 13C  
 P1 10.00 usec  
 PL1 -2.70 dB  
 PL1W 62.67650986 W  
 SFO1 100.6228298 MHz

----- CHANNEL f2 -----  
 CPDPRGf2 waltz16  
 NUC2 1H  
 PCPD2 60.00 usec  
 PL2 -5.00 dB  
 PL12 10.78 dB  
 PL13 15.00 dB  
 PL2W 30.18447304 W  
 PL12W 0.79759723 W  
 PL13W 0.30184472 W  
 SFO2 400.1316005 MHz

F2 - Processing parameters  
 SI 32768  
 SF 100.6128189 MHz  
 WDW EM  
 SSB 0  
 LB 1.00 Hz  
 GB 0  
 PC 1.40

# S-(6-Amino-5-nitropyridin-2-yl) 4-fluorobenzothioate (**8e**)

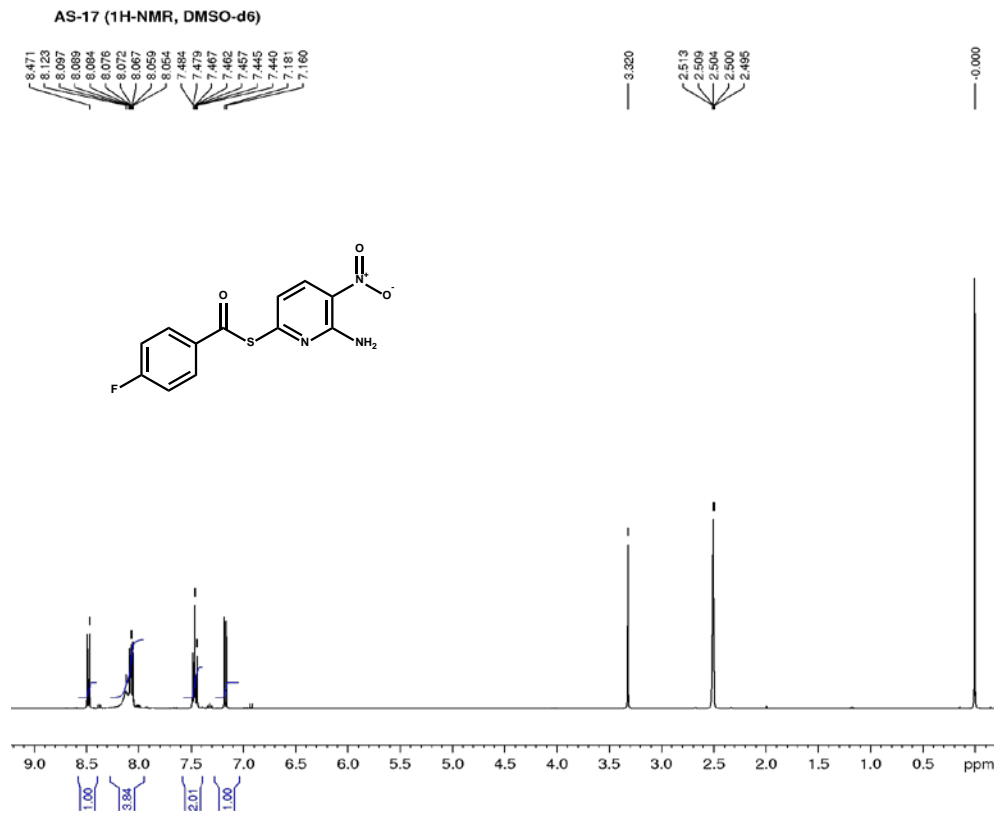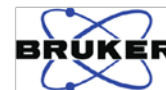

Current Data Parameters  
 NAME A. Surur  
 EXPNO 159  
 PROCNO 1

F2 - Acquisition Parameters  
 Date\_ 20170220  
 Time 10.23  
 INSTRUM spect  
 PROBHD 5 mm PABBO BB-  
 PULPROG zg30  
 TD 65536  
 SOLVENT DMSO  
 NS 16  
 DS 2  
 SWH 8223.665 Hz  
 FIDRES 0.125483 Hz  
 AQ 3.9845889 sec  
 RG 114  
 DW 60.800 usec  
 DE 10.00 usec  
 TE 298.2 K  
 D1 1.0000000 sec  
 TDD 1

----- CHANNEL f1 -----  
 NUC1 1H  
 P1 9.75 usec  
 PL1 -5.00 dB  
 PL1W 30.18447304 W  
 SFO1 400.1324710 MHz

F2 - Processing parameters  
 SI 32768  
 SF 400.1300017 MHz  
 WDW EM  
 SSB 0  
 LB 0.30 Hz  
 GB 0  
 PC 1.00

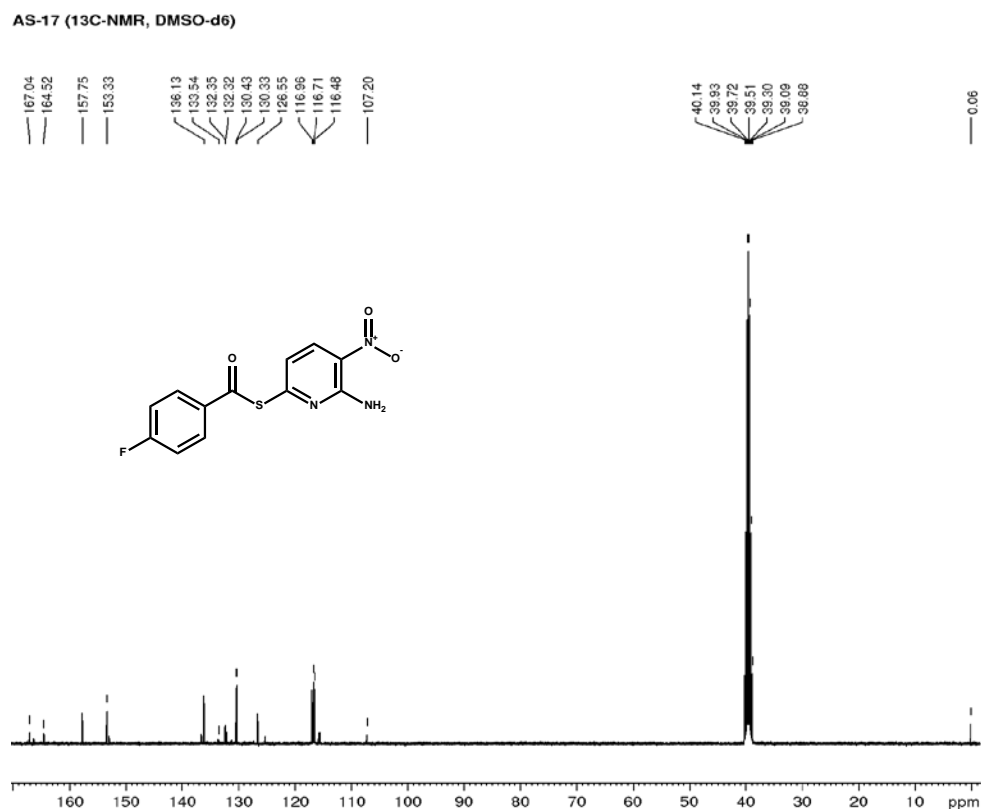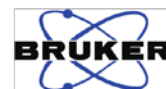

Current Data Parameters  
 NAME A. Surur  
 EXPNO 128  
 PROCNO 1

F2 - Acquisition Parameters  
 Date\_ 20170120  
 Time 14.52  
 INSTRUM spect  
 PROBHD 5 mm PABBO BB-  
 PULPROG zgpg30  
 TD 65536  
 SOLVENT DMSO  
 NS 1024  
 DS 4  
 SWH 24038.461 Hz  
 FIDRES 0.366798 Hz  
 AQ 1.3631488 sec  
 RG 2050  
 DW 20.800 usec  
 DE 10.00 usec  
 TE 298.2 K  
 D1 2.0000000 sec  
 D11 0.0300000 sec  
 TDD 1

----- CHANNEL f1 -----  
 NUC1 13C  
 P1 10.00 usec  
 PL1 -2.70 dB  
 PL1W 62.67650986 W  
 SFO1 100.6228298 MHz

----- CHANNEL f2 -----  
 CPDPRG2 waltz16  
 NUC2 1H  
 FCPD2 60.00 usec  
 PL2 -5.00 dB  
 PL12 10.78 dB  
 PL13 15.00 dB  
 PL12W 30.18447304 W  
 PL12W 0.79759723 W  
 PL13W 0.30184472 W  
 SFO2 400.1316005 MHz

F2 - Processing parameters  
 SI 32768  
 SF 100.6128179 MHz  
 WDW EM  
 SSB 0  
 LB 1.00 Hz  
 GB 0  
 PC 1.40



### 3-Nitro-6-[[2-(piperidin-1-yl)ethyl]thio]pyridin-2-amine (8f)

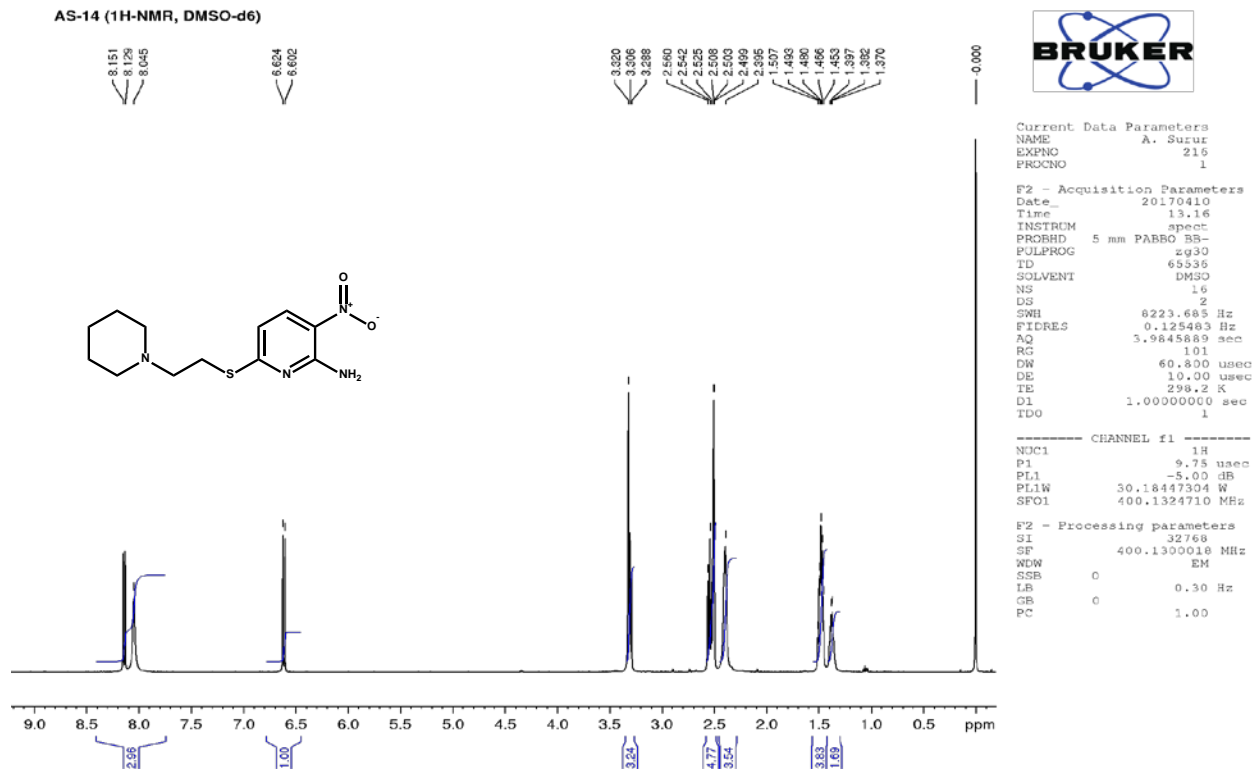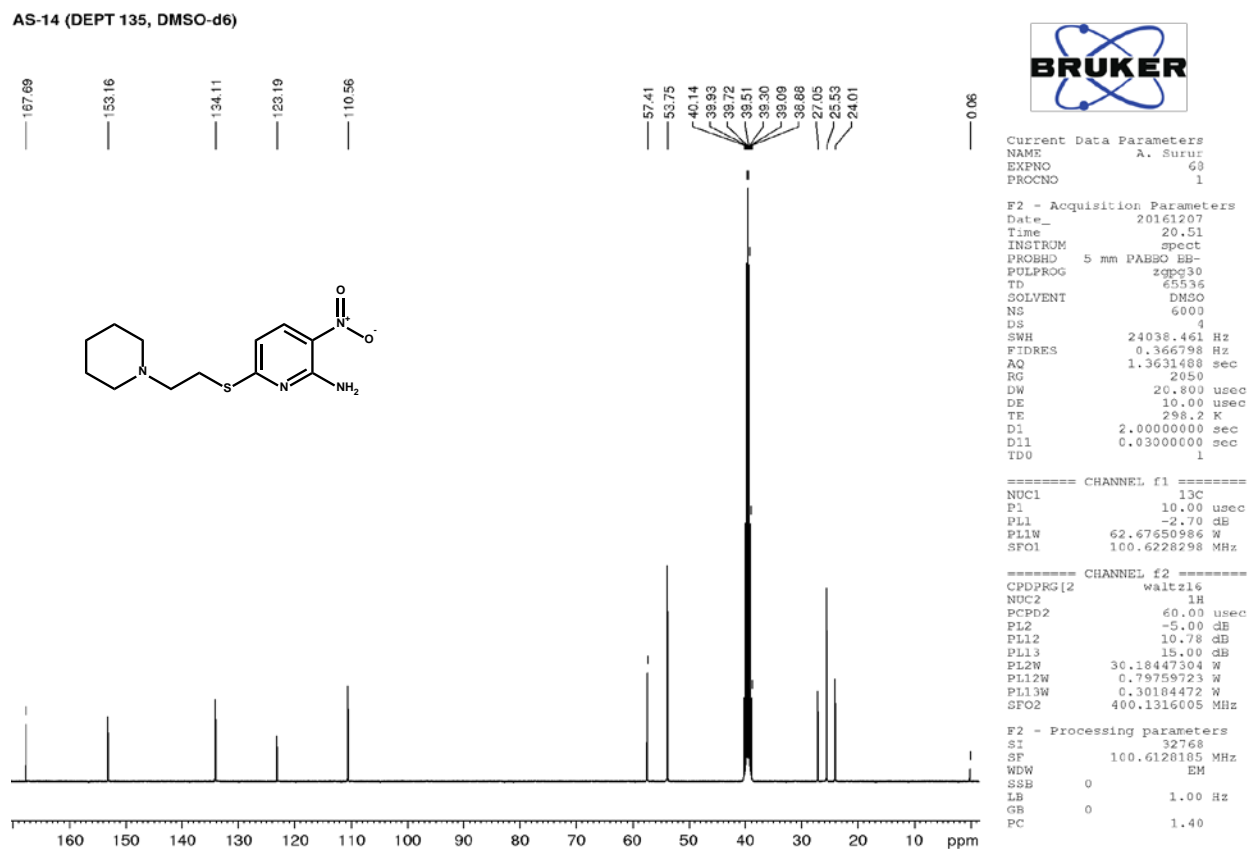

# 6-(Benzylthio)-*N*-methyl-3-nitropyridin-2-amine (8g)

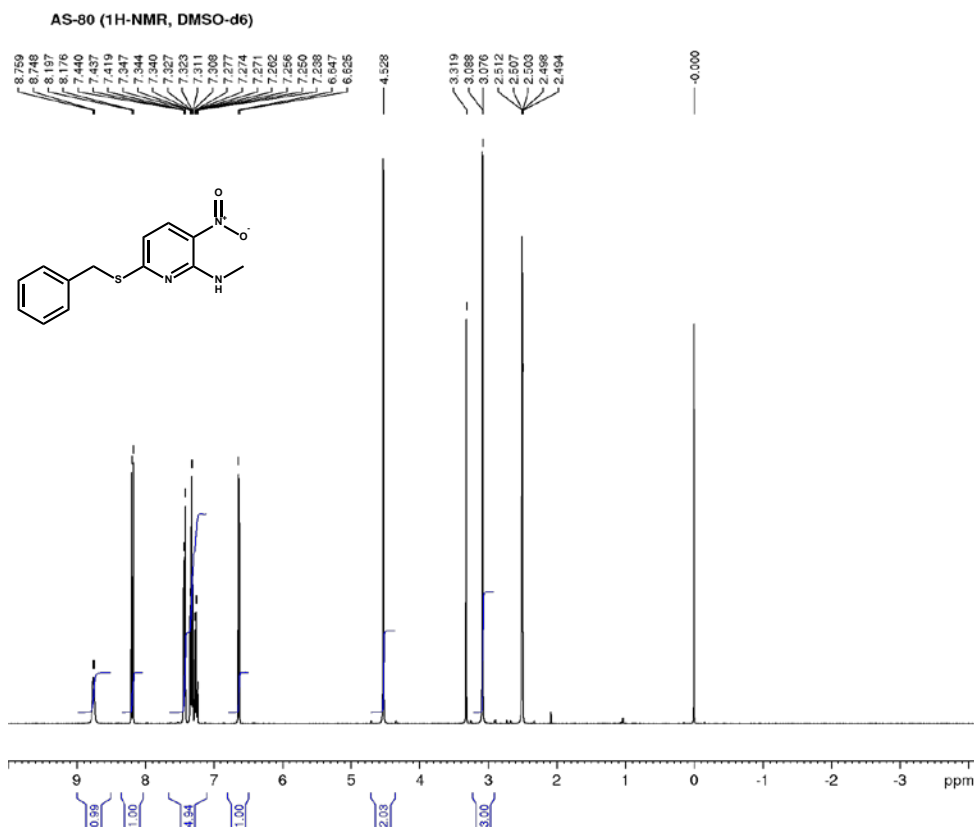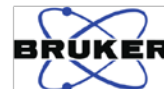

Current Data Parameters  
 NAME A. Surur  
 EXPNO 523  
 PROCNO 1

F2 - Acquisition Parameters  
 Date\_ 20171110  
 Time 9.47  
 INSTRUM spect  
 PROBHD 5 mm PABBO BB-  
 PULPROG zg30  
 ID 65536  
 SOLVENT DMSO  
 NS 16  
 DS 2  
 SWH 6223.695 Hz  
 FIDRES 0.125883 Hz  
 AQ 3.9845889 sec  
 RG 114  
 DW 60.800 usec  
 DE 10.00 usec  
 TE 298.1 K  
 D1 1.0000000 sec  
 TD0 1

===== CHANNEL f1 =====  
 NUC1 1H  
 P1 9.75 usec  
 PL1 -5.00 dB  
 PL1W 30.18447304 W  
 SFO1 400.1324710 MHz

F2 - Processing parameters  
 SI 32768  
 SF 400.1300019 MHz  
 WDW EM  
 SSB 0  
 LB 0.30 Hz  
 GB 0  
 PC 1.00

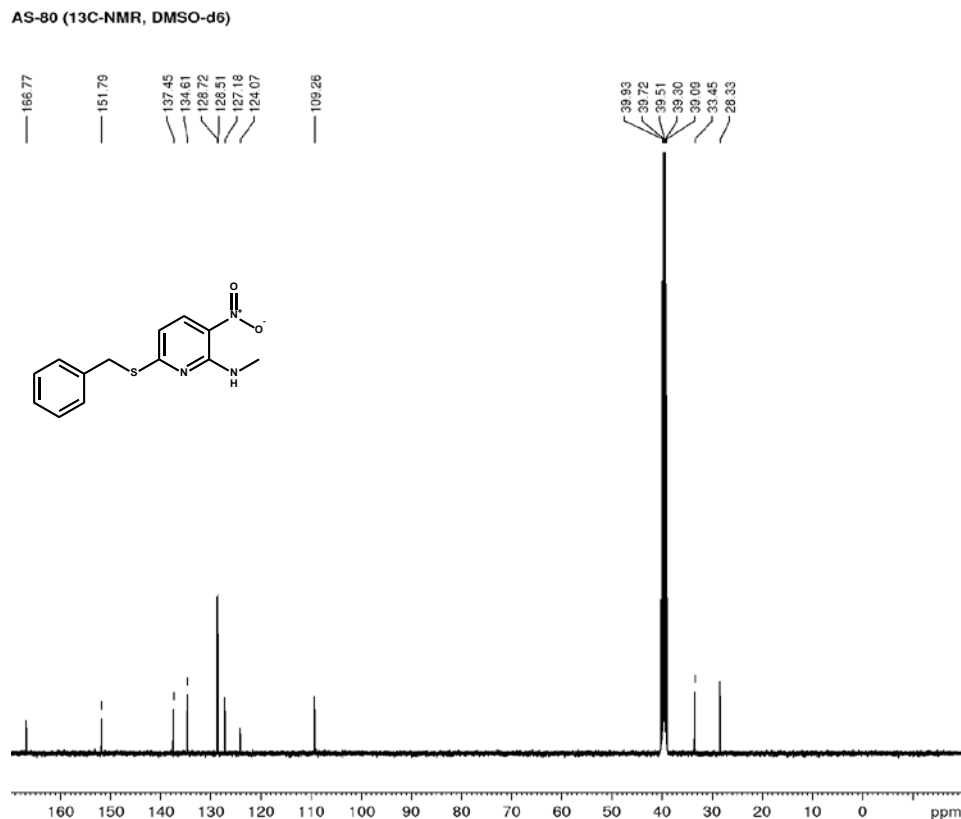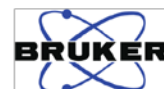

Current Data Parameters  
 NAME A. Surur  
 EXPNO 549  
 PROCNO 1

F2 - Acquisition Parameters  
 Date\_ 20171124  
 Time 9.59  
 INSTRUM spect  
 PROBHD 5 mm PABBO BB-  
 PULPROG zgpg30  
 ID 65536  
 SOLVENT DMSO  
 NS 1024  
 DS 4  
 SWH 24038.461 Hz  
 FIDRES 0.356798 Hz  
 AQ 1.3631488 sec  
 RG 2050  
 DW 20.800 usec  
 DE 10.00 usec  
 TE 298.2 K  
 D1 2.0000000 sec  
 D11 0.0300000 sec  
 TD0 1

===== CHANNEL f1 =====  
 NUC1 13C  
 P1 10.00 usec  
 PL1 -2.70 dB  
 PL1W 62.67650986 W  
 SFO1 100.6228298 MHz

===== CHANNEL f2 =====  
 CPOPRG2 waltz16  
 NUC2 1H  
 PCPD2 60.00 usec  
 PL2 -5.00 dB  
 PL12 10.78 dB  
 PL13 15.00 dB  
 PL2W 30.18447304 W  
 PL12W 0.79759723 W  
 PL13W 0.30184472 W  
 SFO2 400.1316005 MHz

F2 - Processing parameters  
 SI 32768  
 SF 100.6128175 MHz  
 WDW EM  
 SSB 0  
 LB 1.00 Hz  
 GB 0  
 PC 1.40

# 6[(4-Fluorobenzyl)thio]-2-methyl-3-nitropyridine (8h)

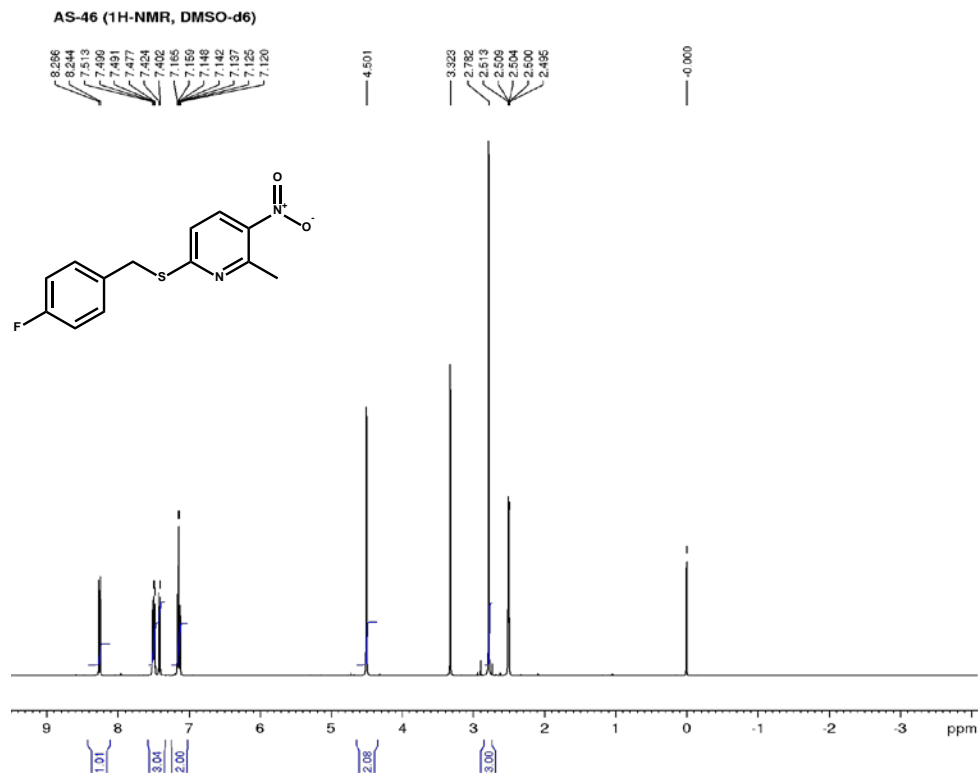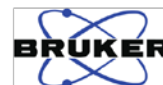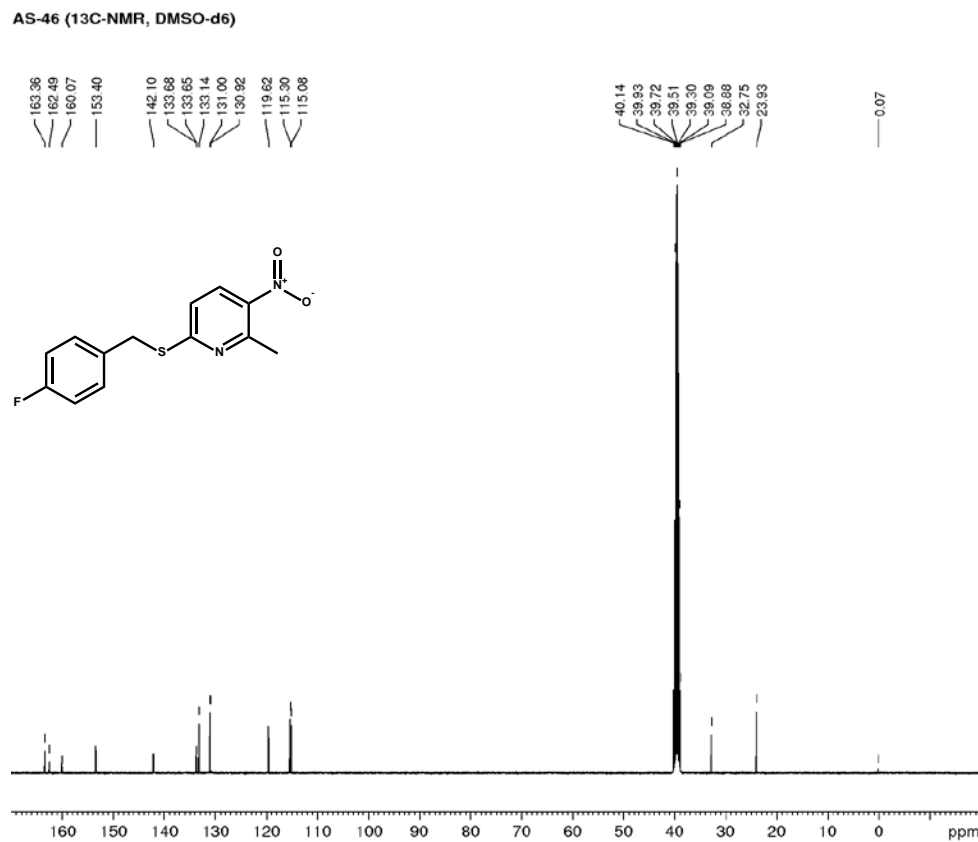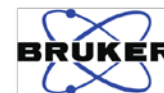

# N-{2-Amino-6-[(4-fluorobenzyl)thio]pyridin-3-yl}-3,4-difluorobenzamide (9a)

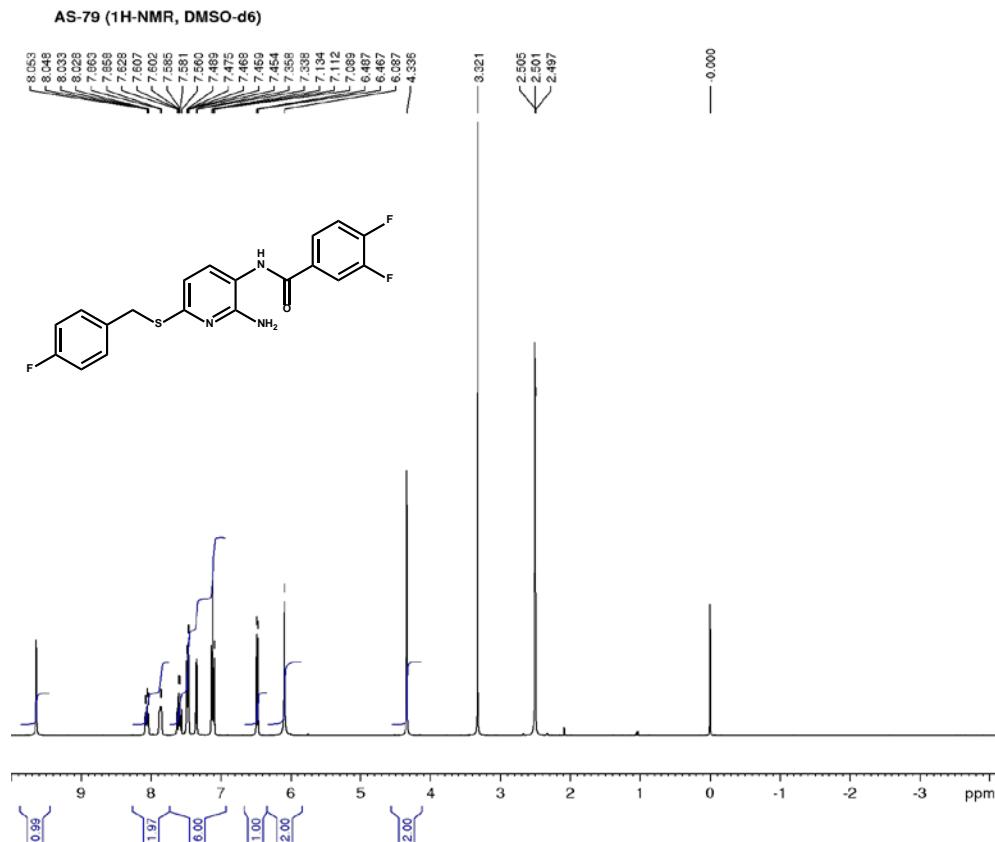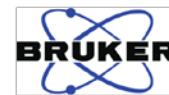

Current Data Parameters  
 NAME A. Surur  
 EXPNO 529  
 PROCNO 1

F2 - Acquisition Parameters  
 Date\_ 20171115  
 Time 3.08  
 INSTRUM spect  
 PROBHD 5 mm PABBO BB-  
 PULPROG zg30  
 TD 65536  
 SOLVENT DMSO  
 NS 16  
 DS 2  
 SWH 8273.685 Hz  
 FIDRES 0.125483 Hz  
 AQ 3.9845889 sec  
 RG 114  
 DW 60.800 usec  
 DE 10.00 usec  
 TE 298.1 K  
 D1 1.0000000 sec  
 TDO 1

===== CHANNEL f1 =====  
 NUC1 1H  
 P1 9.75 usec  
 PL1 -5.00 dB  
 PL1W 30.18447304 W  
 SFO1 400.1324710 MHz

F2 - Processing parameters  
 SI 32768  
 SF 400.1300027 MHz  
 WDW EM  
 SSB 0  
 LB 0.30 Hz  
 GB 0  
 PC 1.00

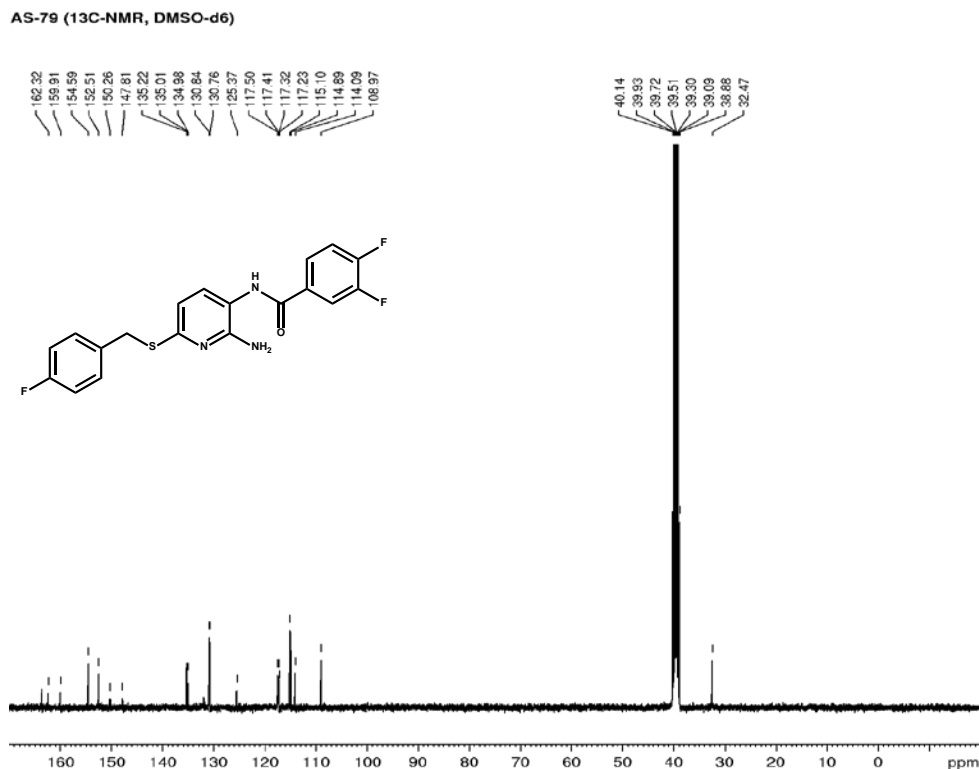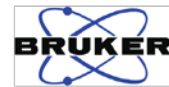

Current Data Parameters  
 NAME A. Surur  
 EXPNO 554  
 PROCNO 1

F2 - Acquisition Parameters  
 Date\_ 20171127  
 Time 11.53  
 INSTRUM spect  
 PROBHD 5 mm PABBO BB-  
 PULPROG zgpg30  
 TD 65536  
 SOLVENT DMSO  
 NS 1024  
 DS 4  
 SWH 24038.461 Hz  
 FIDRES 0.366798 Hz  
 AQ 1.3631488 sec  
 RG 2050  
 DW 20.800 usec  
 DE 10.00 usec  
 TE 298.2 K  
 D1 2.0000000 sec  
 D11 0.03000000 sec  
 TDO 1

===== CHANNEL f1 =====  
 NUC1 13C  
 P1 10.00 usec  
 PL1 -2.70 dB  
 PL1W 62.67650986 W  
 SFO1 100.6228298 MHz

===== CHANNEL f2 =====  
 CPDPRG12 waltz16  
 NUC2 1H  
 PCPD2 60.00 usec  
 PL2 -5.00 dB  
 PL12 10.78 dB  
 PL13 15.00 dB  
 PL2W 30.18447304 W  
 PL12W 0.79759723 W  
 PL13W 0.30184472 W  
 SFO2 400.1316005 MHz

F2 - Processing parameters  
 SI 32768  
 SF 100.6128177 MHz  
 WDW EM  
 SSB 0  
 LB 1.00 Hz  
 GB 0  
 PC 1.40

# Ethyl-{6-[(1,1'-biphenyl-4-yl)methylthio]-2-aminopyridin-3-yl}carbamate (9b)

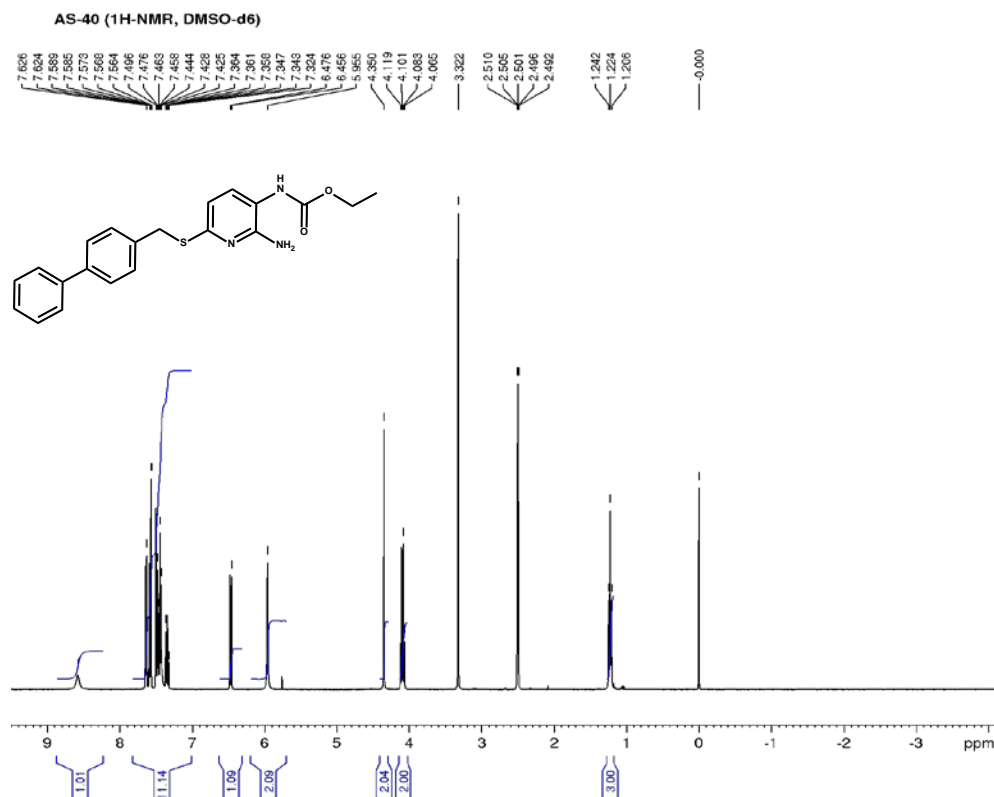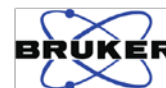

Current Data Parameters  
 NAME A. Surur  
 EXPNO 325  
 PROCNO 1

F2 - Acquisition Parameters  
 Date\_ 20170622  
 Time 14.01  
 INSTRUM spect  
 PROBHD 5 mm PABBO BB-  
 PULPROG zg30  
 TD 65536  
 SOLVENT DMSO  
 NS 16  
 DS 2  
 SWH 8223.685 Hz  
 FIDRES 0.125403 Hz  
 AQ 3.9845889 sec  
 RG 101  
 DW 60.800 usec  
 DE 10.00 usec  
 TE 298.2 K  
 D1 1.0000000 sec  
 TDO 1

===== CHANNEL f1 =====  
 NUC1 1H  
 P1 9.75 usec  
 PL1 -5.00 dB  
 PL1W 30.18447304 W  
 SFO1 400.1324710 MHz

F2 - Processing parameters  
 SI 32768  
 SF 400.1300030 MHz  
 WDW EM  
 SSB 0  
 LB 0.30 Hz  
 GB 0  
 FC 1.00

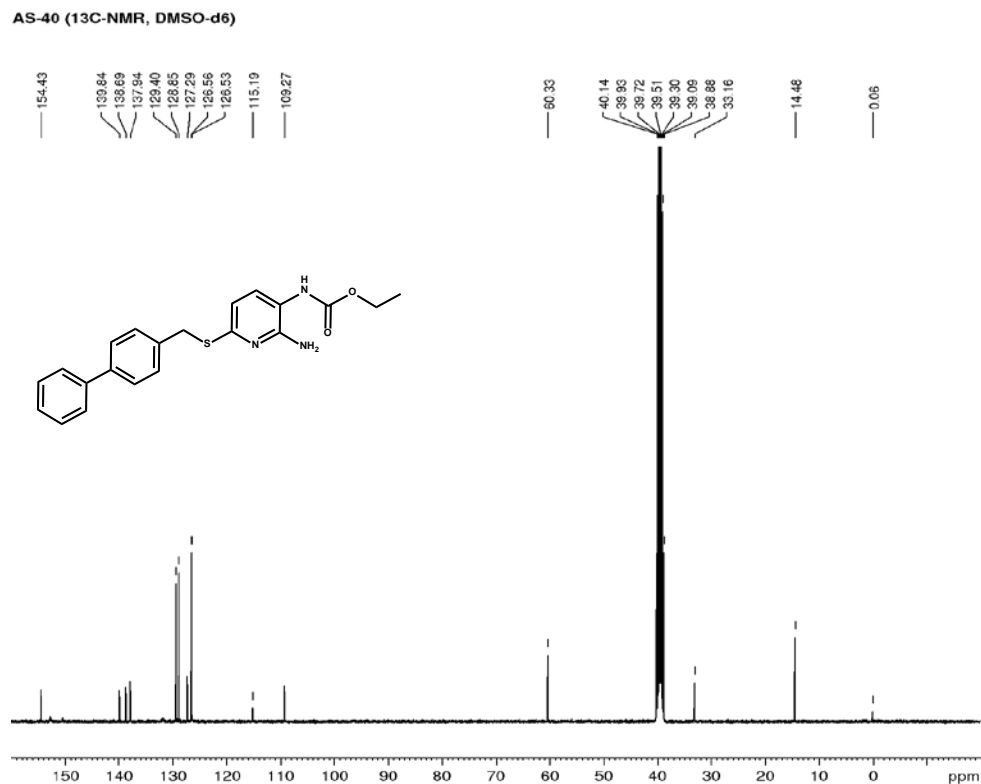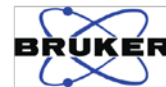

Current Data Parameters  
 NAME A. Surur  
 EXPNO 326  
 PROCNO 1

F2 - Acquisition Parameters  
 Date\_ 20170622  
 Time 18.49  
 INSTRUM spect  
 PROBHD 5 mm PABBO BB-  
 PULPROG zgpg30  
 TD 65536  
 SOLVENT DMSO  
 NS 4000  
 DS 4  
 SWH 24038.461 Hz  
 FIDRES 0.366798 Hz  
 AQ 1.3631488 sec  
 RG 2050  
 DW 20.800 usec  
 DE 10.00 usec  
 TE 301.2 K  
 D1 2.0000000 sec  
 D11 0.0300000 sec  
 TDO 1

===== CHANNEL f1 =====  
 NUC1 13C  
 P1 10.00 usec  
 PL1 -2.70 dB  
 PL1W 62.67650986 W  
 SFO1 100.6228298 MHz

===== CHANNEL f2 =====  
 CPDPRG[2] waltz16  
 NUC2 1H  
 PCPD2 60.00 usec  
 PL2 -5.00 dB  
 PL12 10.78 dB  
 PL13 15.00 dB  
 PL2W 30.18447304 W  
 PL12W 0.79759723 W  
 PL13W 0.30184472 W  
 SFO2 400.1316005 MHz

F2 - Processing parameters  
 SI 32768  
 SF 100.6128202 MHz  
 WDW EM  
 SSB 0  
 LB 1.00 Hz  
 GB 0  
 FC 1.40

# Ethyl-{2-amino-6-[(3,5-dimethoxybenzylthio)pyridin-3-yl]}carbamate (9c)

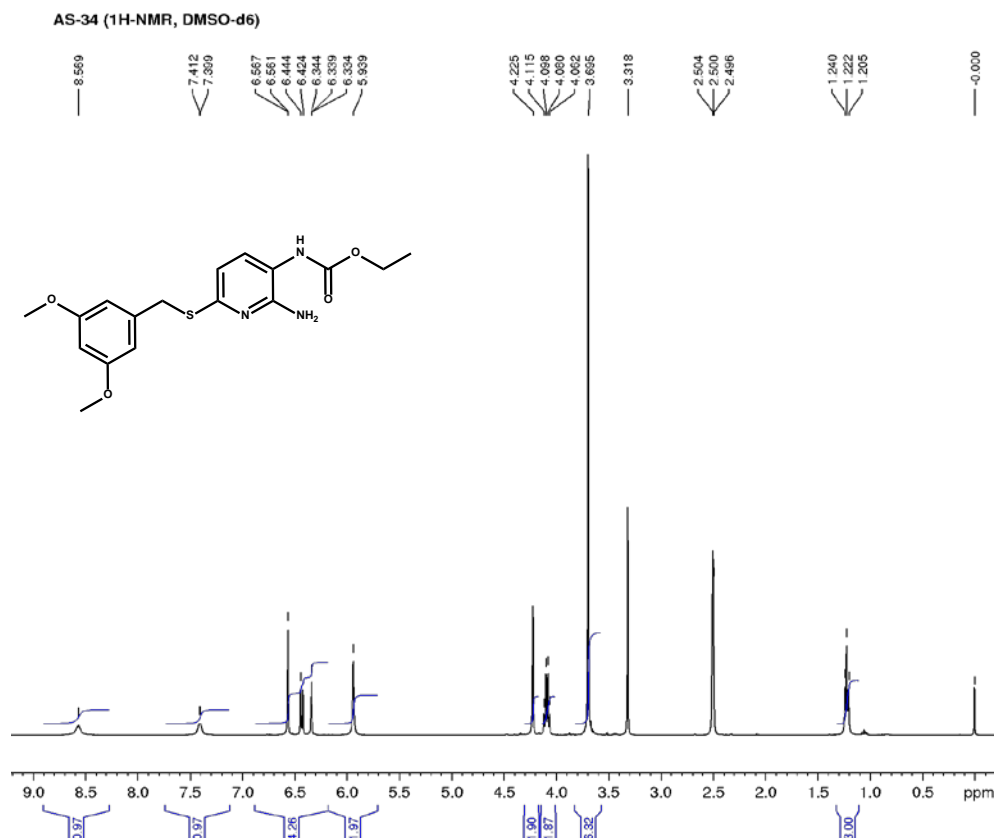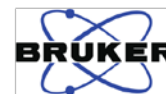

Current Data Parameters  
 NAME A. Surur  
 EXPNO 291  
 PROCNO 1

F2 - Acquisition Parameters  
 Date\_ 20170524  
 Time 10.28  
 INSTRUM spect  
 PROBHD 5 mm PABBO BB-  
 PULPROG zg30  
 TD 65536  
 SOLVENT DMSO  
 NS 16  
 DS 2  
 SWH 8223.685 Hz  
 FIDRES 0.125483 Hz  
 AQ 3.9845889 sec  
 RG 114  
 DW 60.800 usec  
 DE 10.00 usec  
 TE 298.2 K  
 D1 1.00000000 sec  
 TD0 1

CHANNEL f1  
 NUC1 1H  
 P1 9.75 usec  
 PL1 -5.00 dB  
 PL1W 30.18447304 W  
 SFO1 400.1324710 MHz

F2 - Processing parameters  
 SI 32768  
 SF 400.1300030 MHz  
 WDN EM  
 SSB 0  
 LB 0.30 Hz  
 GB 0  
 PC 1.00

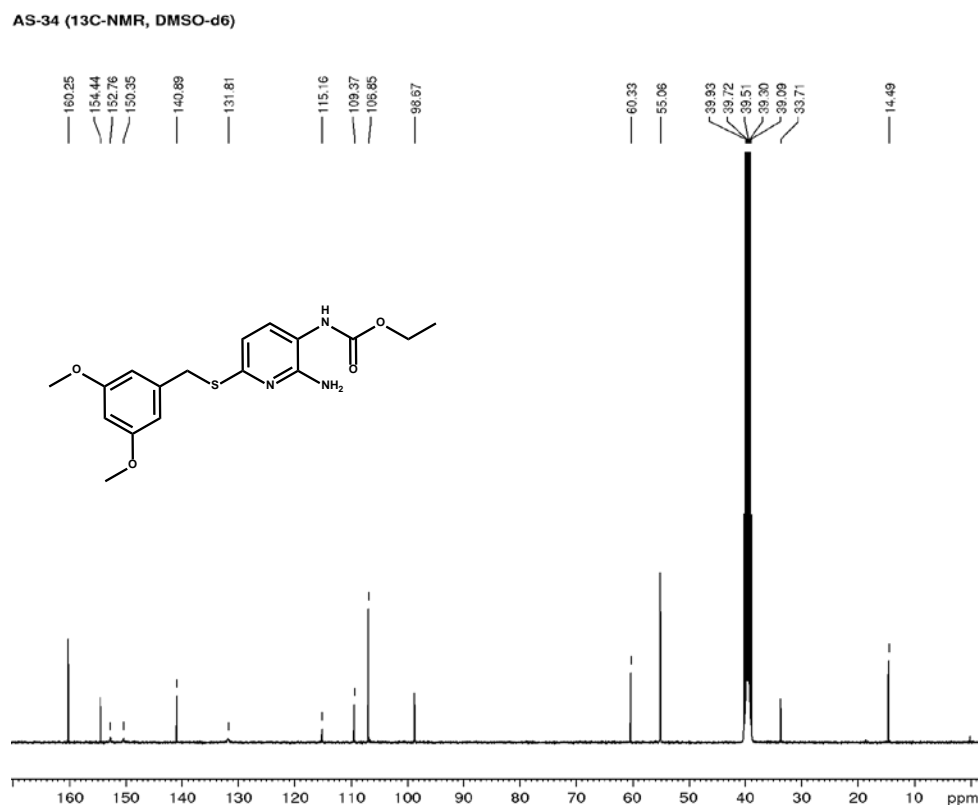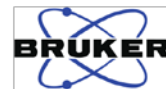

Current Data Parameters  
 NAME A. Surur  
 EXPNO 292  
 PROCNO 1

F2 - Acquisition Parameters  
 Date\_ 20170525  
 Time 7.17  
 INSTRUM spect  
 PROBHD 5 mm PABBO BB-  
 PULPROG zgpg30  
 TD 65536  
 SOLVENT DMSO  
 NS 15000  
 DS 4  
 SWH 24038.461 Hz  
 FIDRES 0.366798 Hz  
 AQ 1.3631488 sec  
 RG 2050  
 DW 20.800 usec  
 DE 10.00 usec  
 TE 299.2 K  
 D1 2.00000000 sec  
 D11 0.03000000 sec  
 TD0 1

CHANNEL f1  
 NUC1 13C  
 P1 10.00 usec  
 PL1 -2.70 dB  
 PL1W 62.67650986 W  
 SFO1 100.6228298 MHz

CHANNEL f2  
 CPDPRG2 waltz16  
 NUC2 1H  
 PCPD2 60.00 usec  
 PL2 -5.00 dB  
 PL12 10.78 dB  
 PL13 15.00 dB  
 PL2W 30.18447304 W  
 PL12W 0.78759723 W  
 PL13W 0.30184472 W  
 SFO2 400.1316005 MHz

F2 - Processing parameters  
 SI 32768  
 SF 100.6128189 MHz  
 WDN EM  
 SSB 0  
 LB 1.00 Hz  
 GB 0  
 PC 1.40

# Ethyl-{2-amino-6-[(pyridin-2-ylmethylthio)pyridin-3-yl]}carbamate (9d)

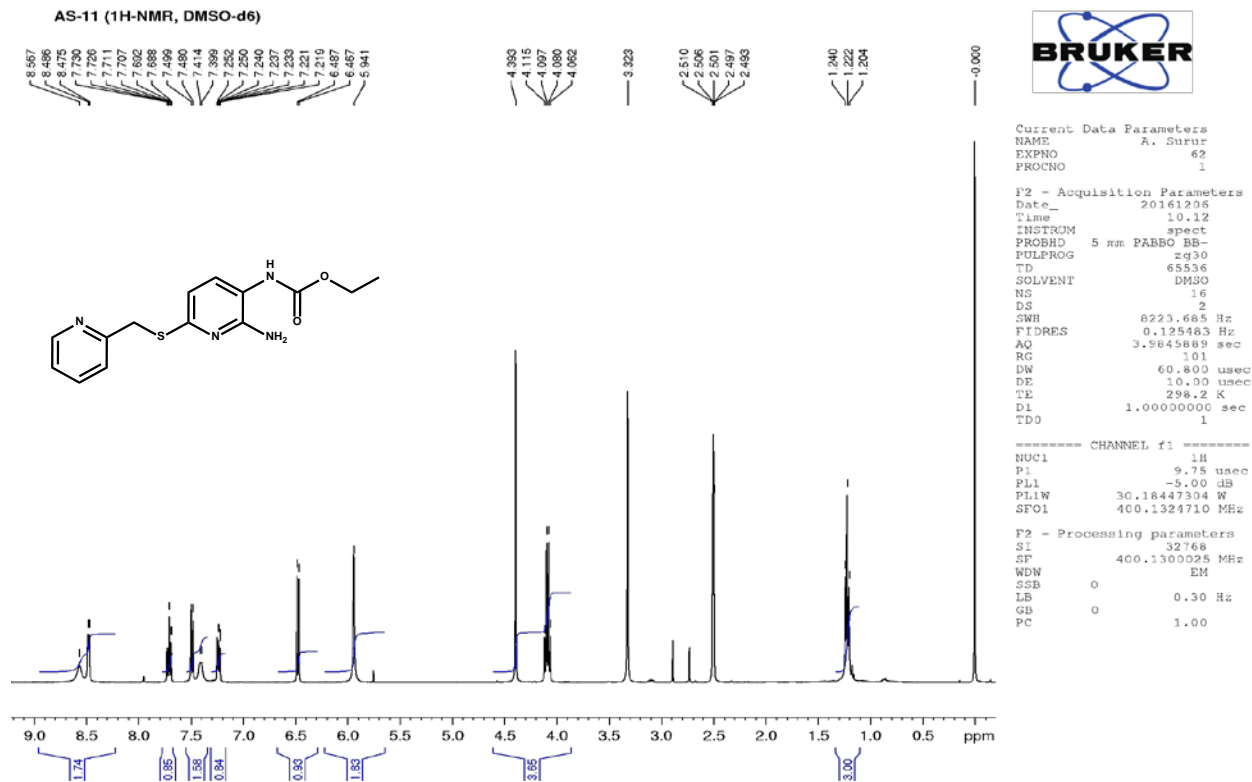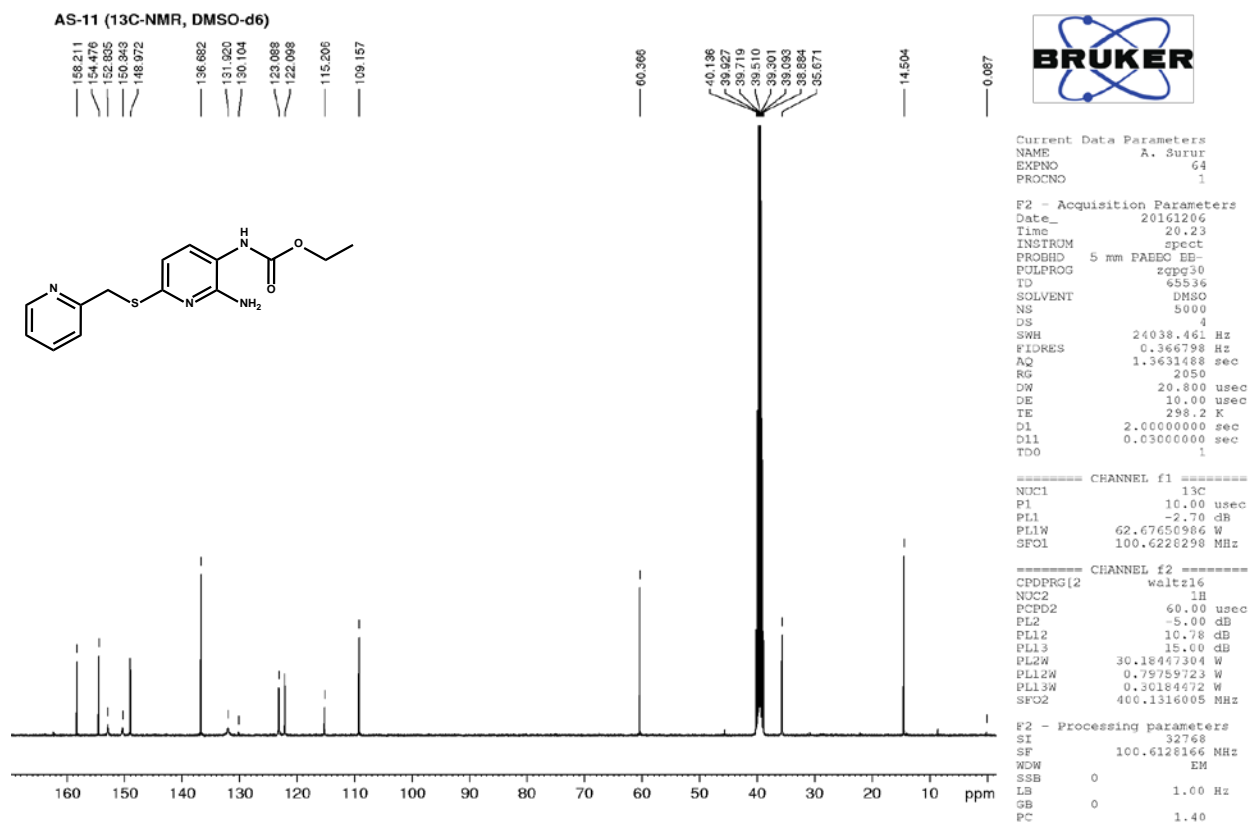

S-{6-Amino-5-[(ethoxycarbonyl)amino]pyridin-2-yl} 4-fluorobenzothioate (9e)

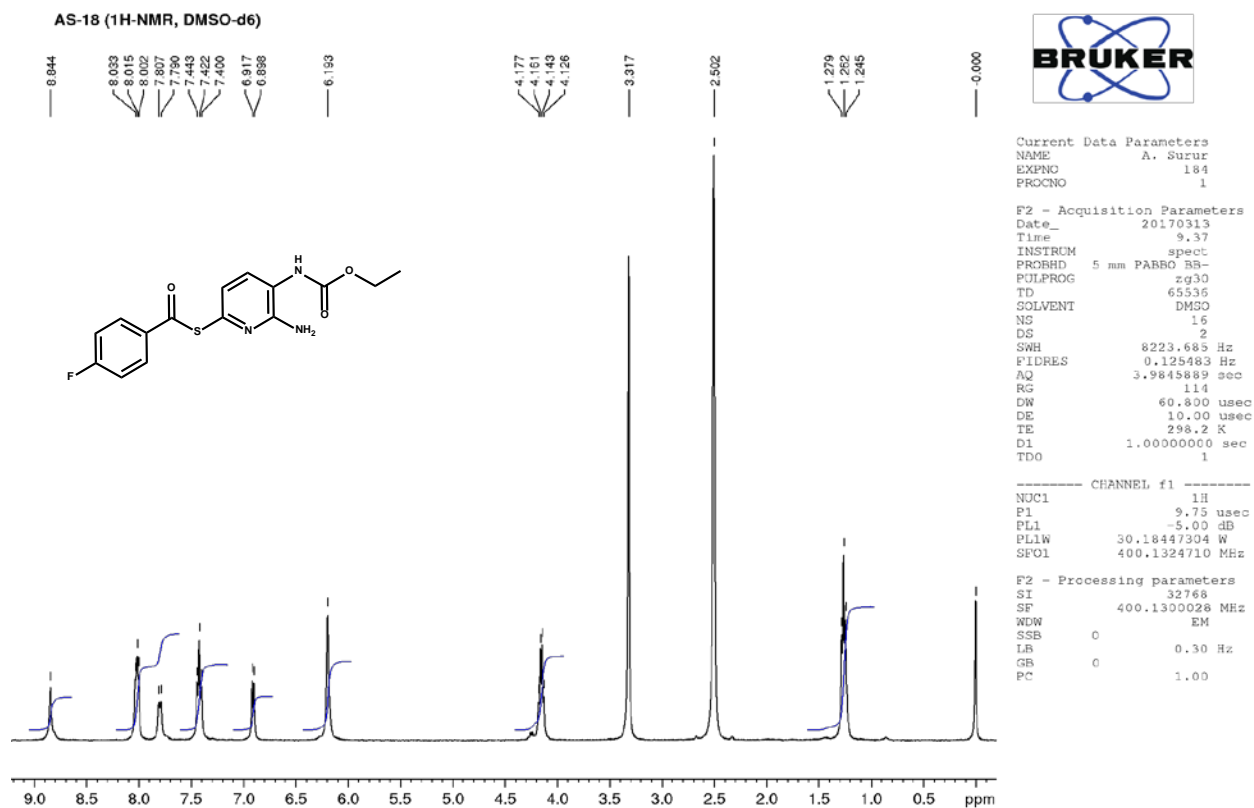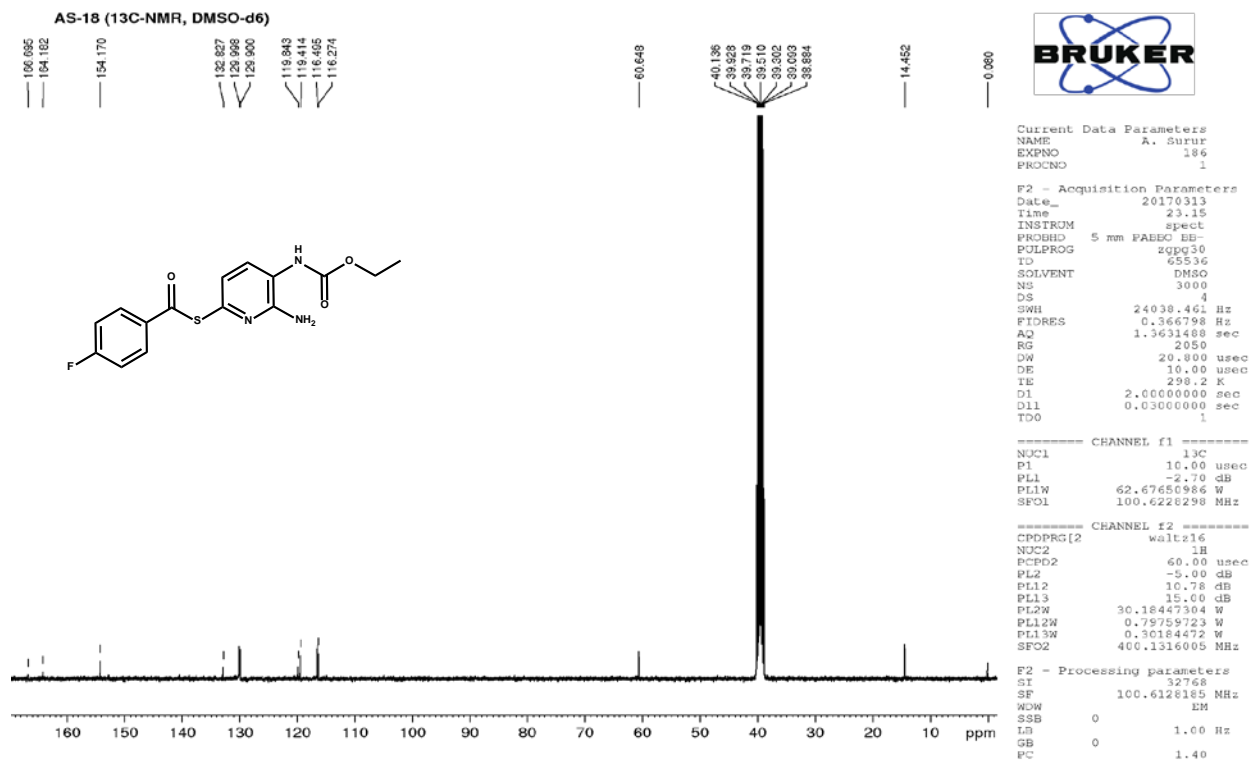



# Ethyl {2-amino-6-([2-(piperidin-1-yl)ethylthio]pyridin-3-yl)carbamate (9f)

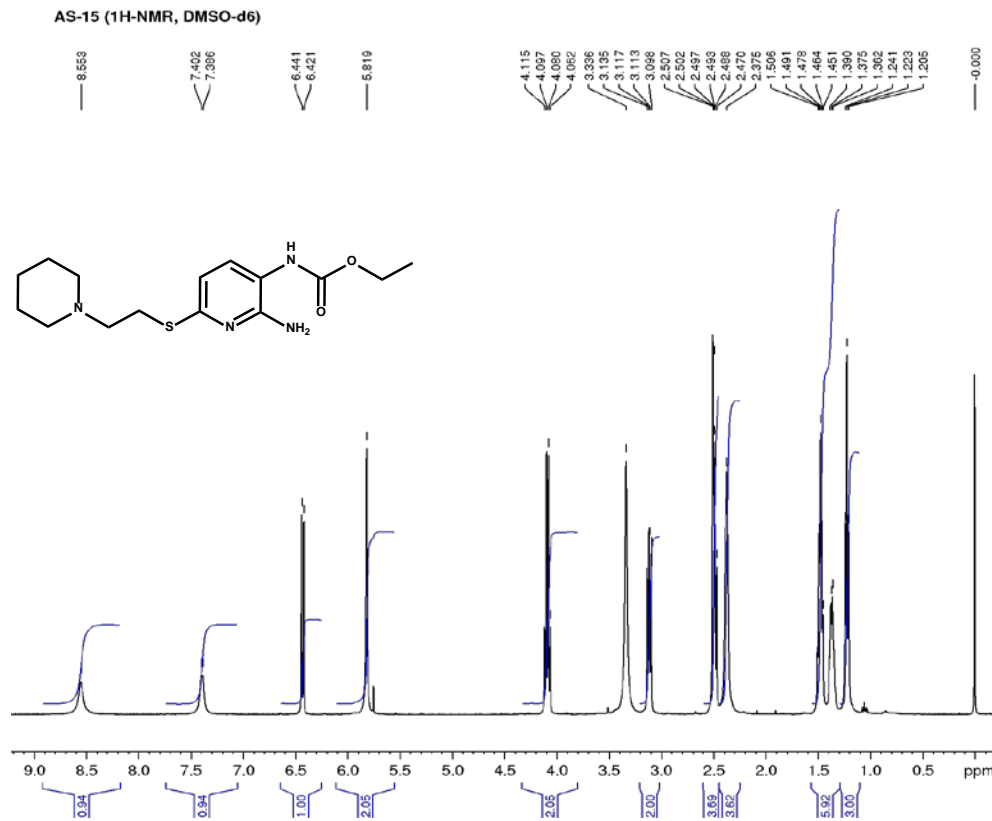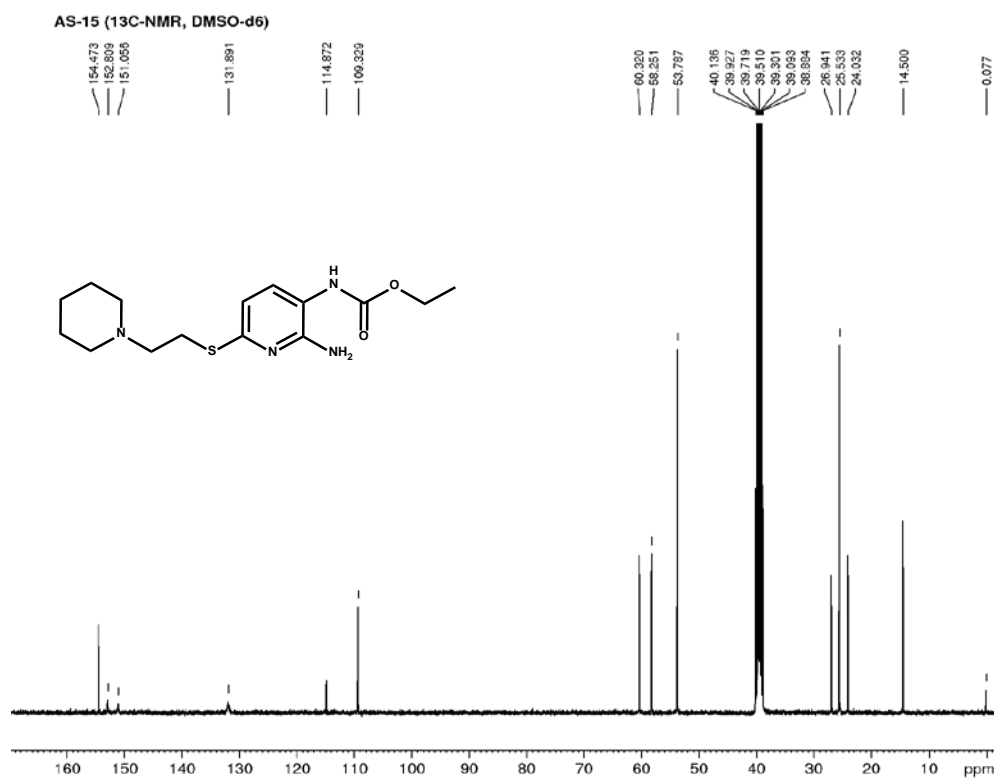

# N-[6-(Benzylthio)-2-(methylamino)pyridin-3-yl]-2-(3,5-difluorophenyl)acetamide (9g)

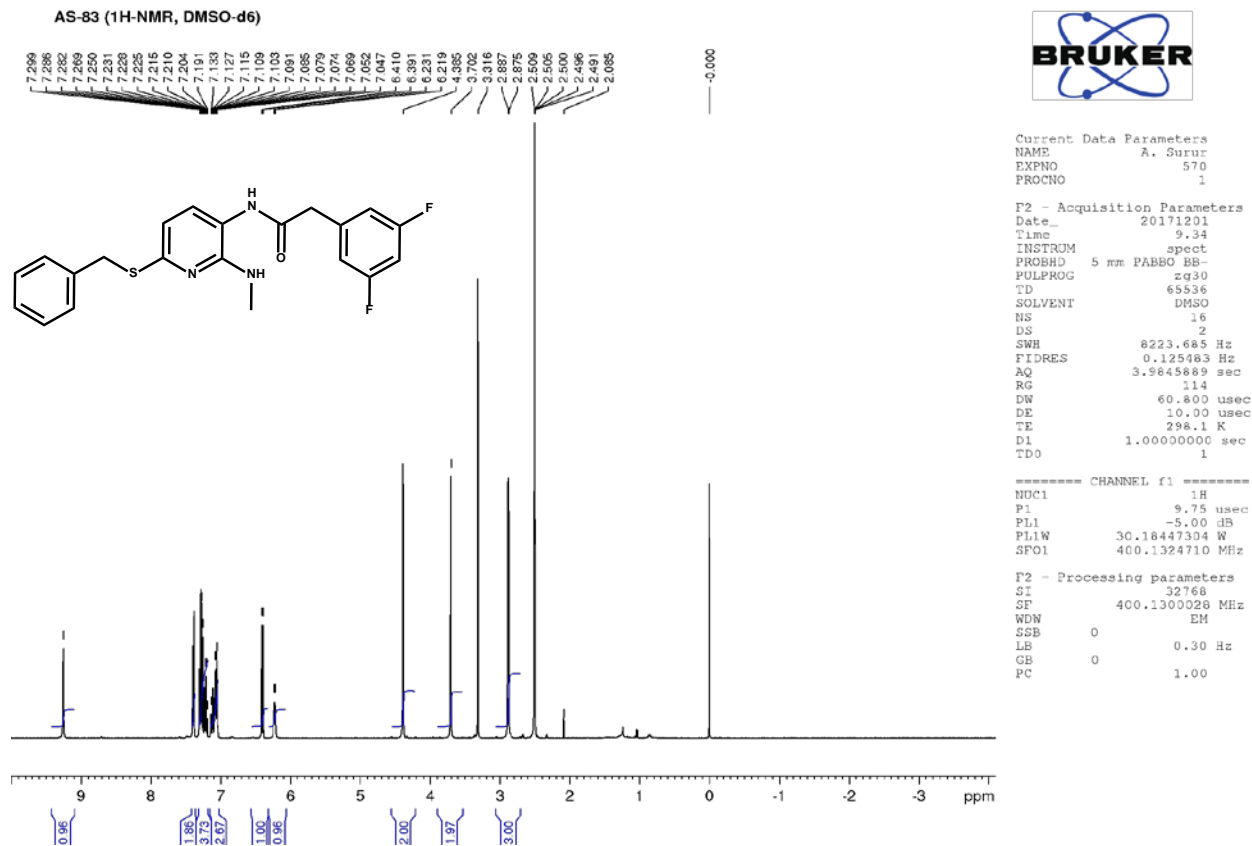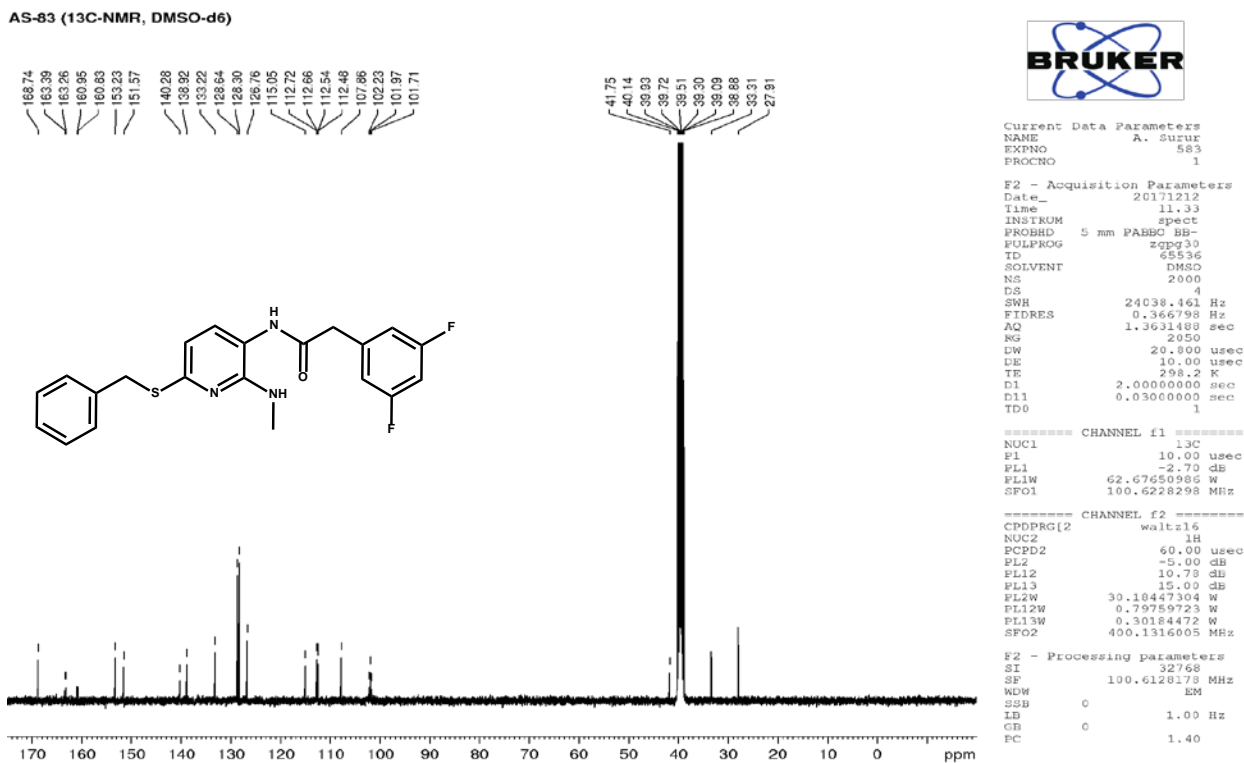

# Ethyl [6-(4-fluorobenzylthio)-2-methylpyridin-3-yl]carbamate (9h)

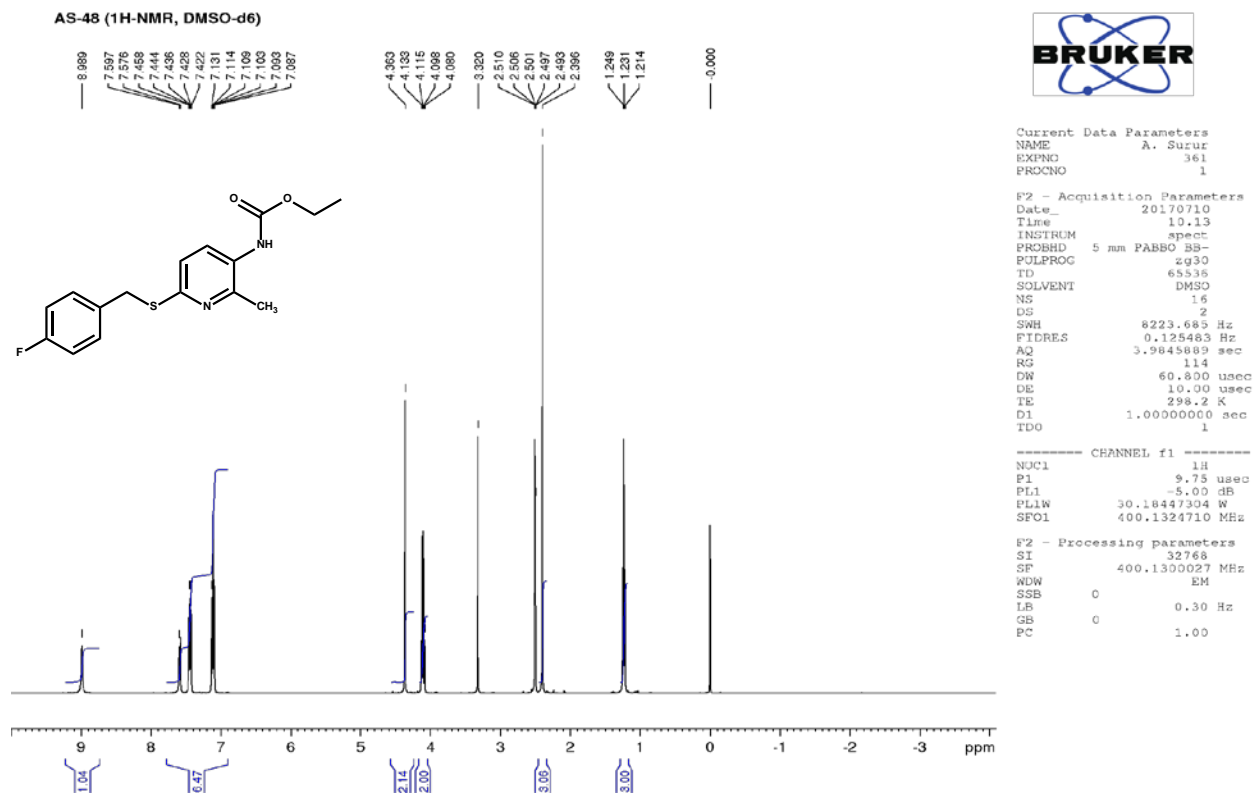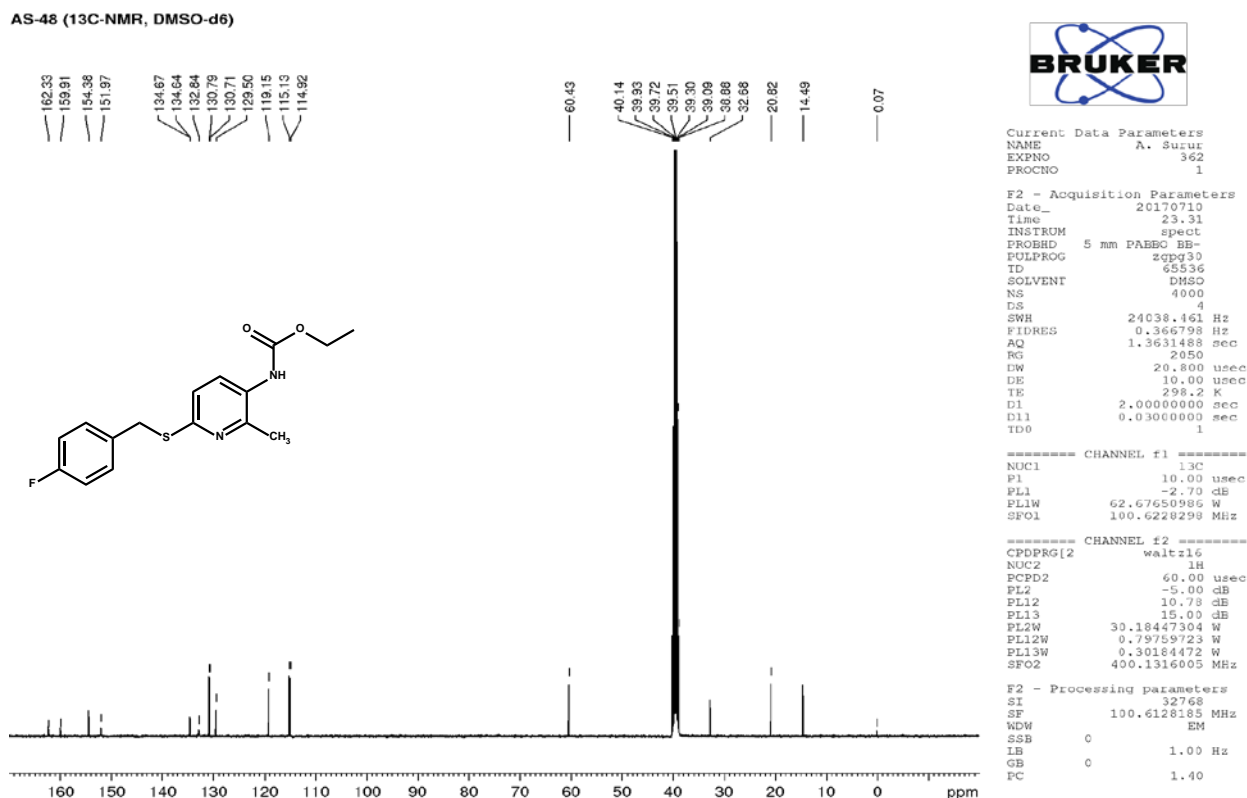

# N-[2-Amino-6-(4-fluorobenzylsulfinyl)pyridin-3-yl]-3,4-difluorobenzamide (10a)

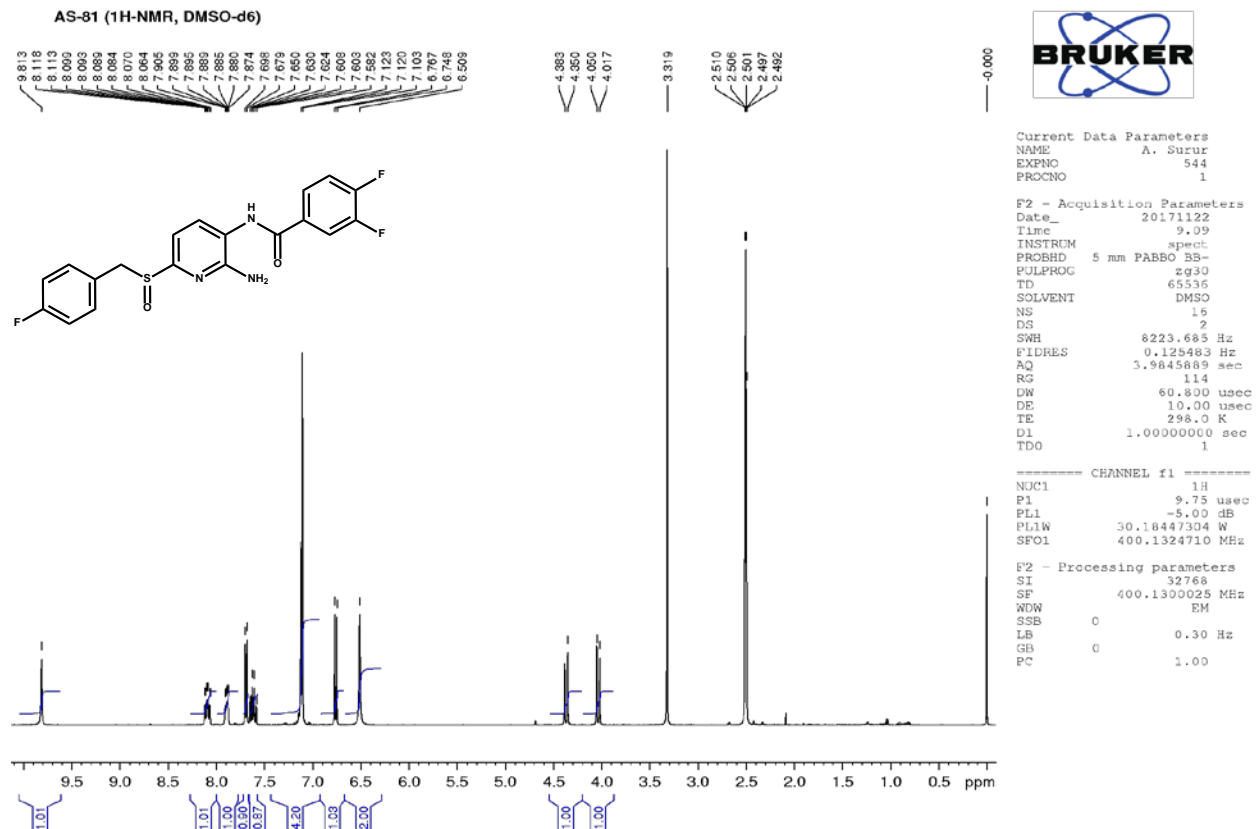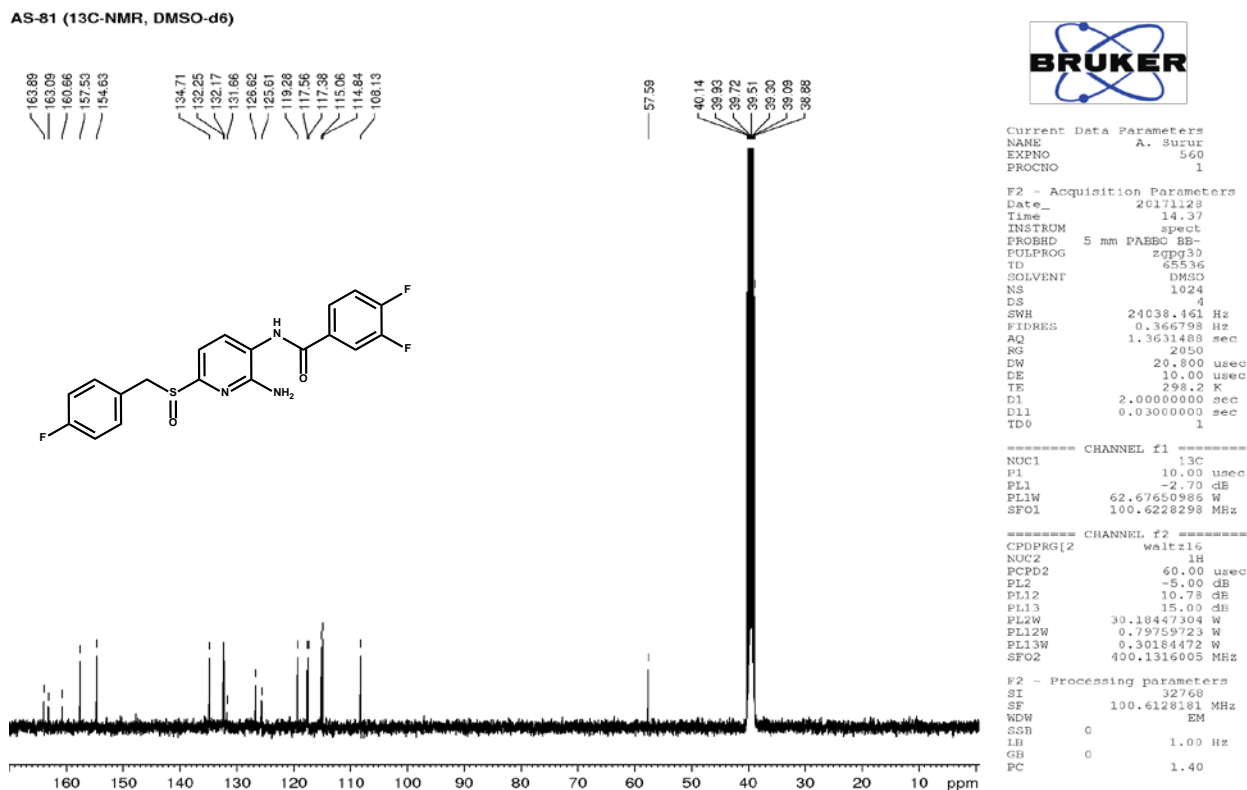

# Ethyl {6-[(1,1'-biphenyl-4-yl)methylsulfinyl]-2-aminopyridin-3-yl}carbamate (10b)

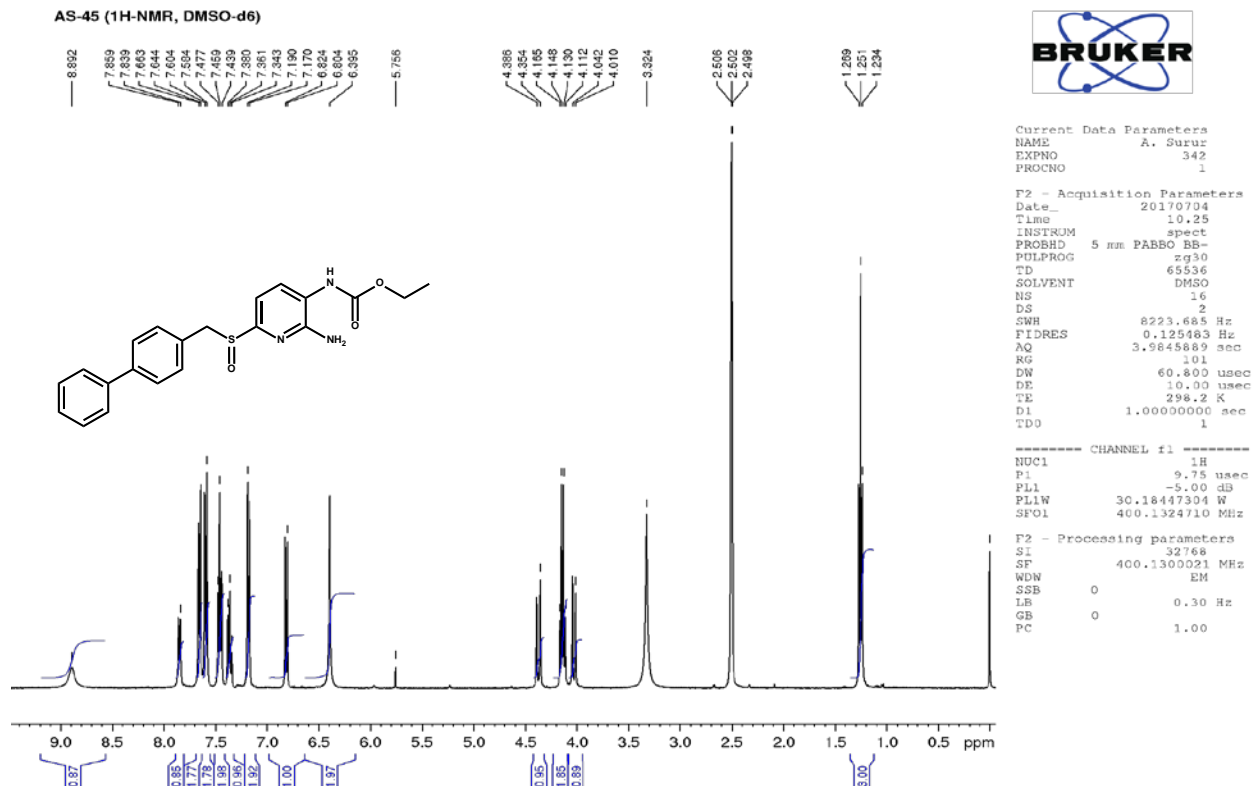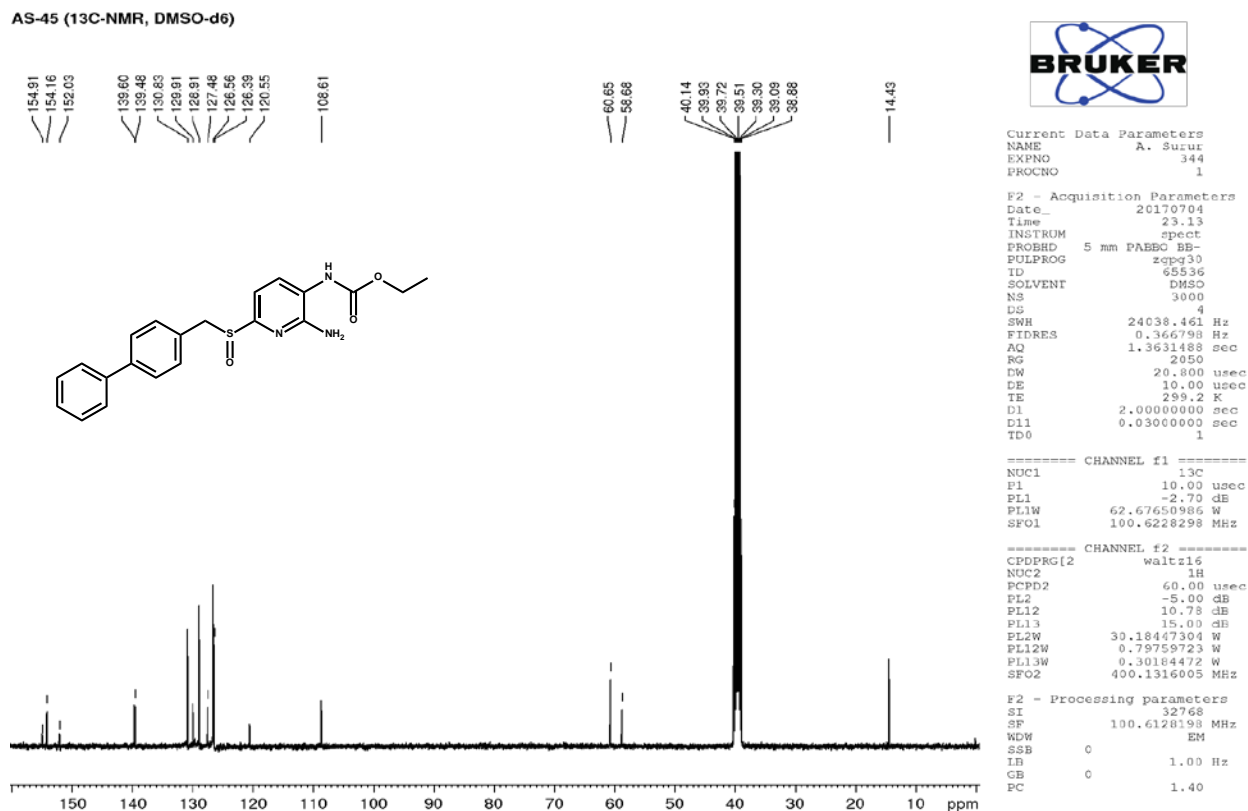

# Ethyl [2-amino-6-(3,5-dimethoxybenzylsulfinyl)pyridin-3-yl]carbamate (10c)

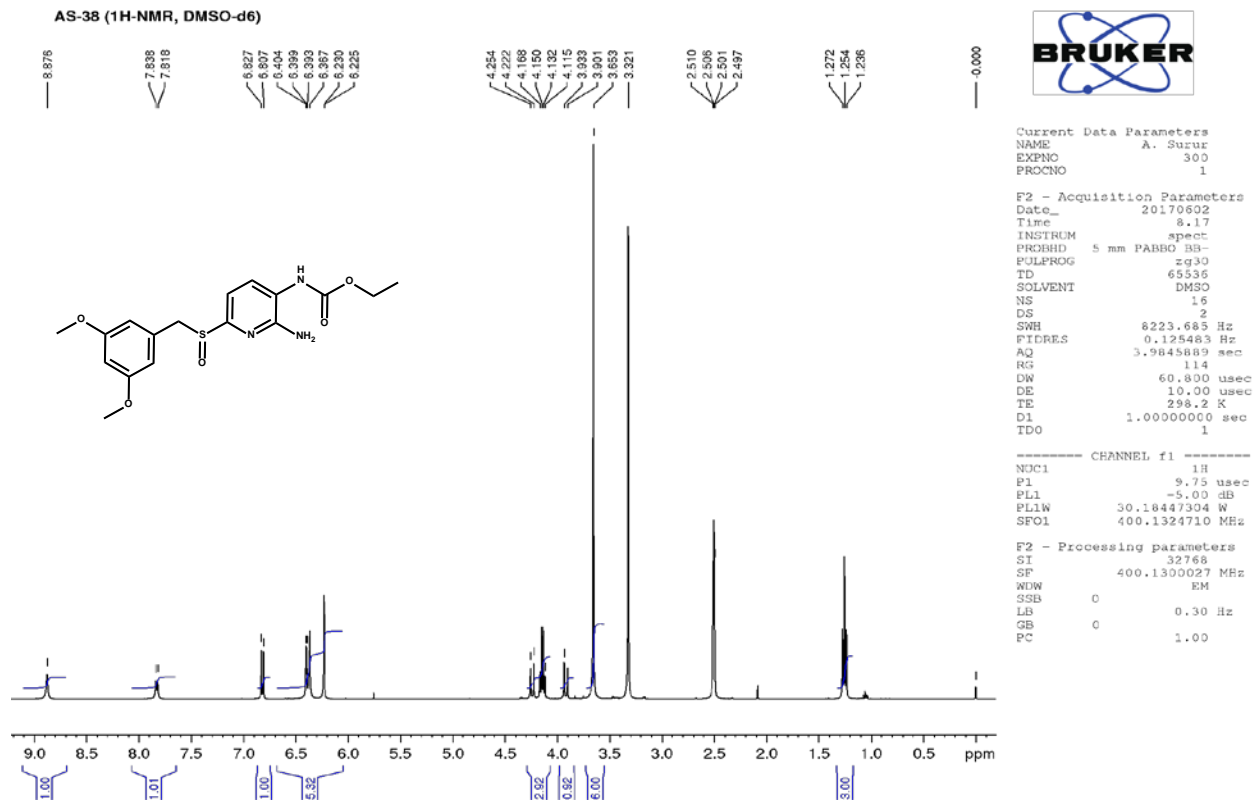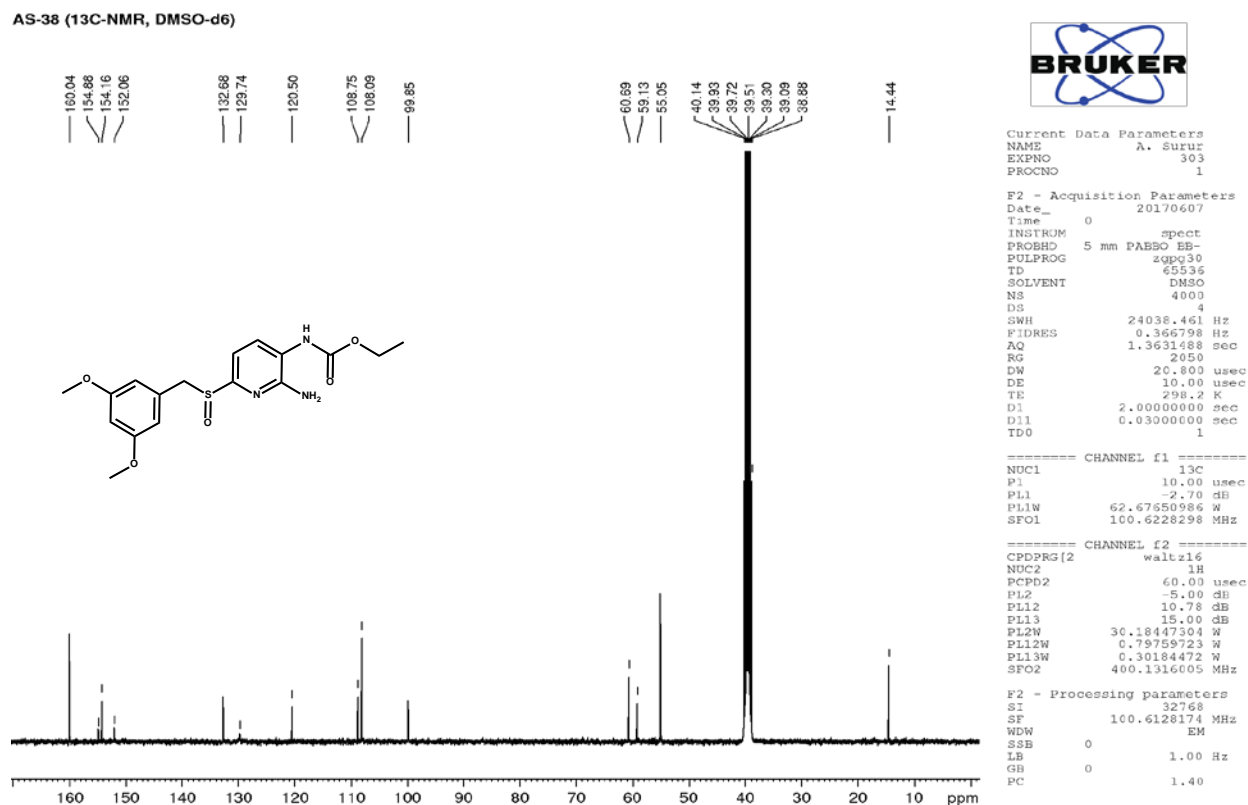

# Ethyl [6-(4-fluorobenzylsulfinyl)-2-methylpyridin-3-yl]carbamate (**10d**)

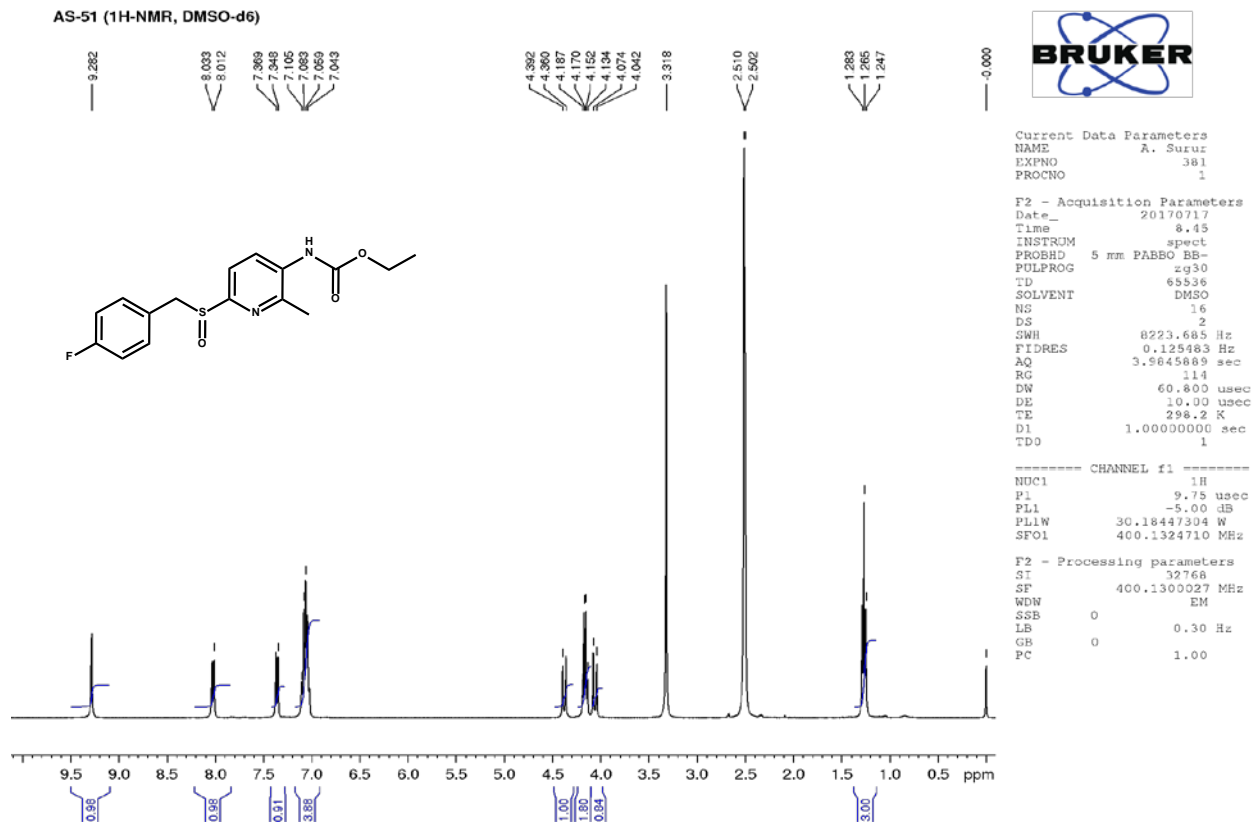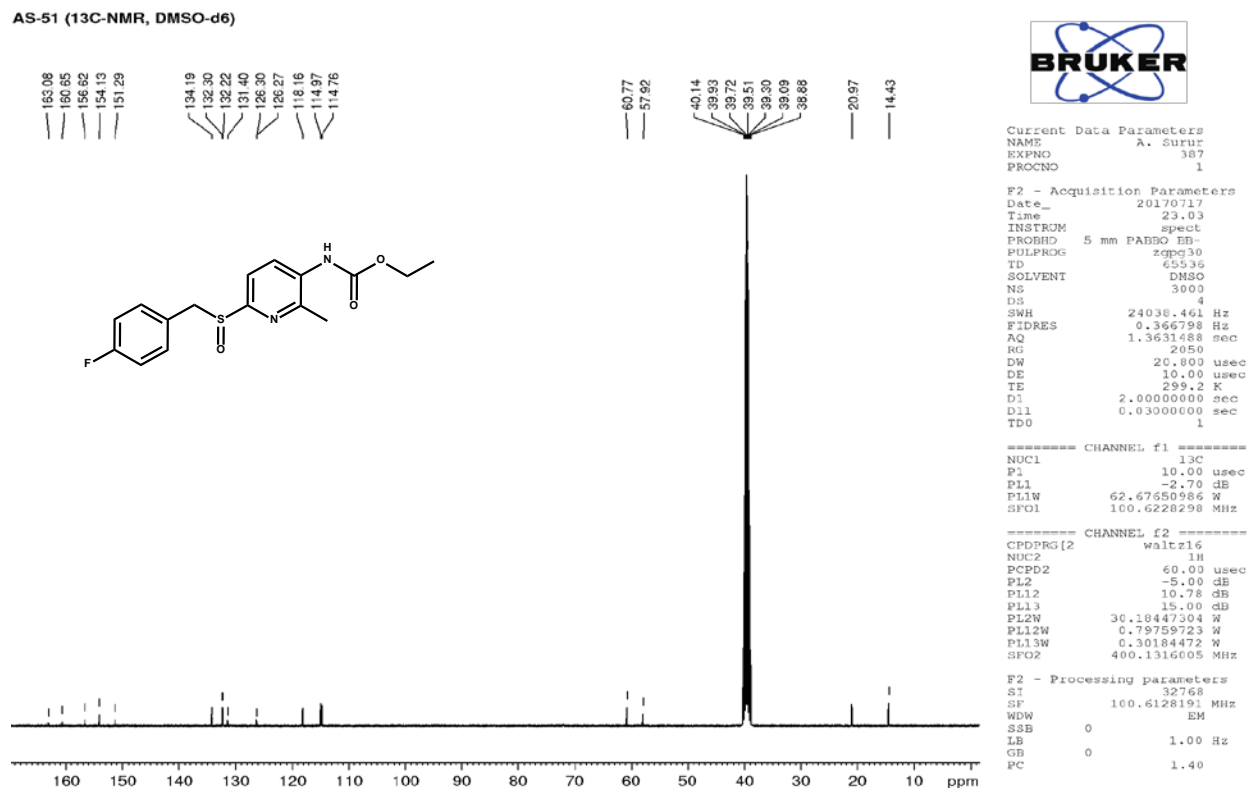

## Calibration curve and retention times for LogD<sub>7.4</sub> determination

Retention time, retention factor and literature LogP values of references

| Reference       | Retention time<br>(mean) | k'    | Logk' | LogP (Lit.) |
|-----------------|--------------------------|-------|-------|-------------|
| Uracil          | 2.72                     |       |       |             |
| Pyridine        | 11.92                    | 3.38  | 0.53  | 0.65        |
| Benzyl alcohol  | 14.95                    | 4.50  | 0.65  | 1.1         |
| Acetanilide     | 16.25                    | 4.98  | 0.70  | 1.16        |
| Picoline        | 19.09                    | 6.02  | 0.78  | 1.2         |
| Acetophenone    | 24.15                    | 7.88  | 0.90  | 1.7         |
| Methyl benzoate | 29.39                    | 9.82  | 0.99  | 2.1         |
| Ethyl benzoate  | 33.65                    | 11.38 | 1.06  | 2.6         |
| Benzophenone    | 37.18                    | 12.68 | 1.10  | 3.2         |
| Phenyl benzoate | 39.18                    | 13.42 | 1.13  | 3.6         |
| Diphenyl ether  | 40.85                    | 14.03 | 1.15  | 4.2         |
| Diphenyl ethane | 43.94                    | 15.17 | 1.18  | 4.8         |
| Triphenylamine  | 47.87                    | 16.62 | 1.22  | 5.7         |

Calibration curve

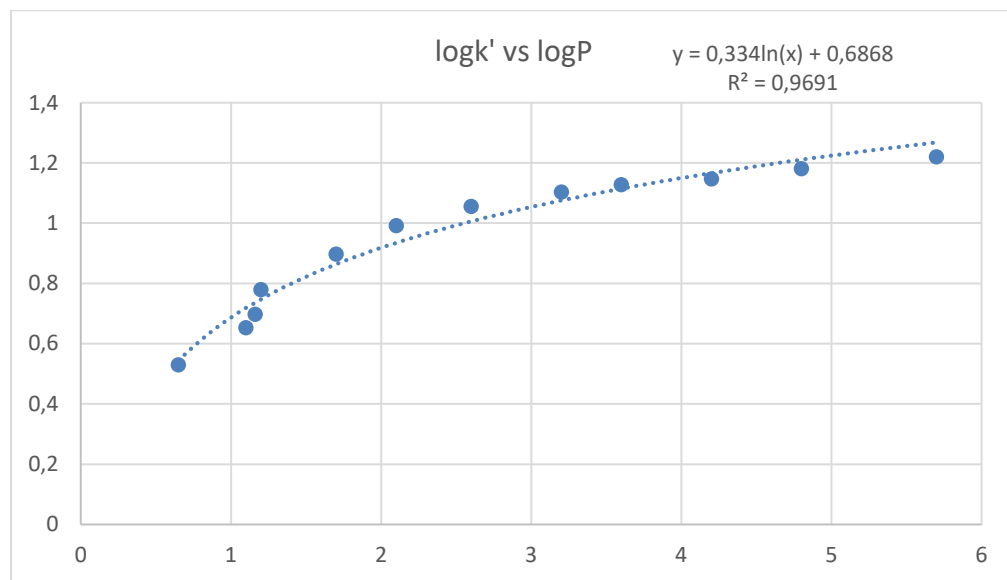



## Retention time, retention factor and LogD<sub>7.4</sub> of synthesized compounds

| Compounds  | Retention time (mean) | k'    | Logk' | LogD <sub>7.4</sub> |
|------------|-----------------------|-------|-------|---------------------|
| <b>9a</b>  | 41.00                 | 13.85 | 1.14  | 3.90                |
| <b>9b</b>  | 44.26                 | 15.03 | 1.18  | 4.34                |
| <b>9c</b>  | 38.76                 | 13.04 | 1.12  | 3.61                |
| <b>9d</b>  | 30.39                 | 10.18 | 1.01  | 2.62                |
| <b>9e</b>  | 34.00                 | 11.31 | 1.05  | 3.00                |
| <b>9f</b>  | 25.99                 | 8.41  | 0.92  | 2.04                |
| <b>9g</b>  | 43.73                 | 14.84 | 1.17  | 4.27                |
| <b>9h</b>  | 40.64                 | 13.72 | 1.14  | 3.85                |
| <b>10a</b> | 35.88                 | 12.00 | 1.08  | 3.24                |
| <b>10b</b> | 39.61                 | 13.34 | 1.12  | 3.72                |
| <b>10c</b> | 32.50                 | 10.77 | 1.03  | 2.81                |
| <b>10d</b> | 34.18                 | 11.38 | 1.06  | 3.02                |

## Biological Evaluations

### MTT cell viability assay

The TAMH and HEP-G2 cell lines were a gift of Dr. Sidney D. Nelson (University of Washington, Seattle, USA) and purchased from the Leibniz-Institute DSMZ-Deutsche Sammlung von Mikroorganismen und Zellkulturen GmbH, Braunschweig, Germany), respectively. Cultivation of TAMH cell line and the determination of the LD<sub>50</sub> values with the MTT cell viability assay have been described elsewhere [1]. The HEP-G2 cell line was cultured in T75 flask (Sarstedt) with RPMI 1640 (PAN Biotech), supplemented with 10% heat-inactivated fetal bovine serum (FBS) (Sigma Aldrich) and 1% penicillin/streptomycin (PAN-Biotech) and were incubated at 37 °C in a humidified incubator with 95% air/5% CO<sub>2</sub>. The HEP-G2 cells were detached from flask by Trypsin-EDTA (Sigma Aldrich) when ~70% confluent and suspended in RPMI 1640. Cells were counted with an EVE™ Automated Cell Counter (NanoEntek) and 15000 cells/well/100 μL RPMI 1640 media were seeded into 96 well plates (Sarstedt). Cells were allowed to attach for 24 h in a humidified incubator at 37 °C. Test compounds and controls were then added to the wells of the plates as previously described for TAMH cells [1]. Both cell lines were exposed for 48 h to the test compounds that had shown activity in K<sub>v</sub>7.2/3 channel opening assay (were a EC<sub>50</sub> value could be generated). The LD<sub>25</sub> is the estimated concentration that reduces the T/C<sub>corr</sub> by 75% and was determined by plotting (log)concentration of test compound versus T/C<sub>corr</sub> and performing linear regression analysis in Microsoft Excel (2013). Determined values are the mean of at least three independent experiments ± standard deviation (SD).

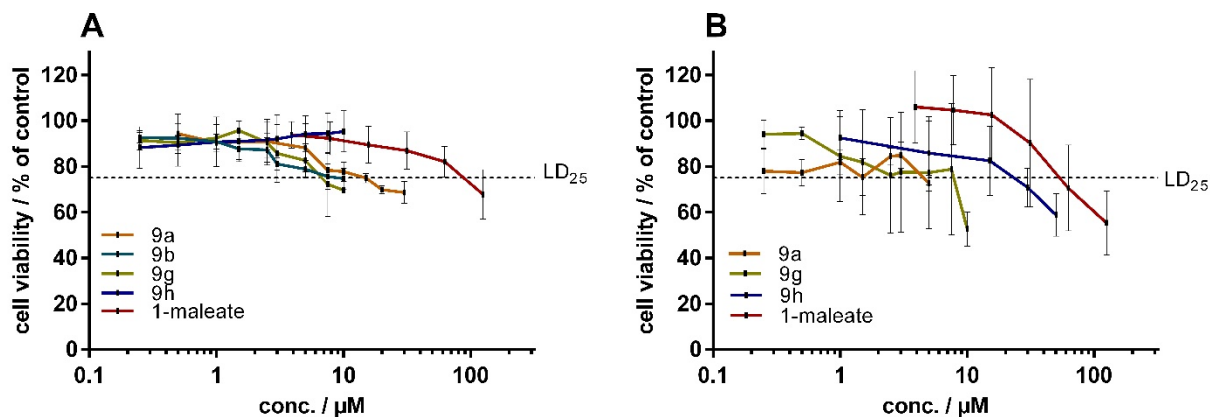

**Figure 1.** Cell viability as a function of compound concentration in TAMH (A) and HEP-G2 cell line (B) after a 48 h exposure, determined by MTT assay; values are the mean  $\pm$  SD from  $\geq 3$  independent experiments.

### K<sub>v</sub>7.2/3 channel opening assay

Cultivation of HEK293 cells expressing K<sub>v</sub>7.2/3 and K<sub>v</sub>7.2/3 channel opening assay were performed as described [1].  $E_{\max}$  value indicates intrinsic activity of a compound relative to flupirtine. It was determined by calculating the difference of lowest and highest corr.  $\Delta F/F$  value of an obtained sigmoidal curve of a compound when corr.  $\Delta F/F$  were plotted versus log(concentration) and related to  $E_{\max}$  of flupirtine maleate that was defined as 100%.  $E_{\max}$  value of a compound is the mean of at least three independent experiments  $\pm$  standard deviation (SD).

### Toxicity/Activity ratio

To estimate the therapeutic ratio between pharmacological activity (i.e., K<sub>v</sub>7.2/3 channel opening activity) and toxicity (i.e., reduced viability in either the TAMH and HEP-G2 cell lines), a toxicity/activity ratio was calculated following the known safety index [2]. Here, the average LD<sub>25</sub> value by the MTT assay after a 48 h exposure of compound in either the TAMH or HEP-G2 cell lines was divided by the average EC<sub>50</sub> value obtained in K<sub>v</sub>7.2/3 channel opening assay with transfected HEK293 cells.

[1] C. Bock, K. Beirow, A. S. Surur, L. Schulig, A. Bodtke, P. J. Bednarski, A. Link, *Org. Biomol. Chem.* **2018**, DOI: 10.1039/c8ob02530d.

[2] Y. Y. Pang, W. K. Yeo, K. Y. Loh, M. L. Go, H. K. Ho. *Food Chem. Toxicol.* **2014**, 71, 207-216.
